# Supplementary material for: Lewis base-catalyzed asymmetric sulfenylation of alkenes: construction of sulfenylated lactones and application to the formal syntheses of (−)-nicotlactone B and (−)-galbacin
Source: Royal Society of Chemistry journal article supplement (doi:10.1039/c9cc04758a), 2019-01-01

*Supporting Information*

**Lewis Base-Catalyzed Asymmetric Sulfenylation of Alkenes: Construction of Sulfenylated Lactones and Application to the Formal Syntheses of (-)-Nicotlactone B and (-)-Galbacin**

Hui-Yun Luo, Yu-Yang Xie, Xu-Feng Song, Jia-Wei Dong, Deng Zhu, and Zhi-Min Chen\*

School of Chemistry and Chemical Engineering & Shanghai Key Laboratory for Molecular Engineering of Chiral Drugs, Shanghai Jiao Tong University, 800 Dongchuan Road, Shanghai 200240, China.

E-mail: chenzhimin221@sjtu.edu.cn.

**Table of Contents**

|                                                                                        |    |
|----------------------------------------------------------------------------------------|----|
| General Considerations: .....                                                          | 2  |
| Catalysts and Substrate Preparation .....                                              | 3  |
| Product Purification/Characterization Data .....                                       | 7  |
| Crystals <b>3e</b> and <b>6a</b> .....                                                 | 25 |
| References .....                                                                       | 29 |
| Copies of HPLC : .....                                                                 | 30 |
| Copies of <sup>1</sup> H NMR, <sup>13</sup> C NMR and <sup>19</sup> F NMR spectra..... | 68 |

## General Considerations:

All reactions were performed using oven-dried or flame-dried glassware equipped with a magnetic stir bar under an atmosphere of argon unless otherwise noted. All reagents were purchased from commercial suppliers and used without further purification. In addition to commercially available extra dry solvents, all solvents were purified by standard operating method. Toluene, tetrahydrofuran (THF), diethyl ether (Et<sub>2</sub>O) and benzene were distilled from sodium; Dichloromethane (DCM) was distilled from calcium hydride. Thin-layer chromatography was performed with EMD silica gel 60 F254 plates eluting with solvents indicated, visualized by a 254 nm UV lamp and stained with phosphomolybdic acid (PMA). <sup>1</sup>H NMR, <sup>13</sup>C NMR and <sup>19</sup>F NMR spectra were obtained on Bruker AM-400 and Bruker AM-500. Chemical shifts (δ) were quoted in ppm relative to tetramethylsilane or residual protio solvent as internal standard (CDCl<sub>3</sub>: 7.26 ppm for <sup>1</sup>H NMR, 77.16 ppm for <sup>13</sup>C NMR), multiplicities are as indicated: s = singlet, d = doublet, t = triplet, q = quartet, m = multiplet, br = broad. Infrared (IR) spectra were recorded on a Fourier transform infrared spectromete. High-resolution mass spectral analysis (HRMS) data were measured on an APEXII 47e FT-ICR spectrometer by means of the ESI technique. Optical rotations were detected on RUDOLPH A21202-J APTV/GW. The enantiomeric excesses (ee) of the products were determined by high performance liquid chromatography (HPLC) analysis employing Daicel Chiralpak OJ-H, Daicel Chiralpak IC, Chiralcel OD-H Columns. Melting points were measured on a melting point apparatus and were uncorrected.

## Catalysts and Substrate Preparation

1.1 Procedures for the synthesis of catalysts according to the literature procedure.<sup>1</sup>

**Figure S1.** catalysts screened

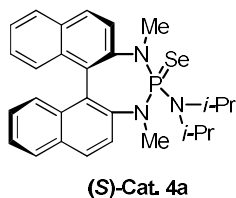

**(S)-Cat. 4a** is known compounds and the analytical data (<sup>1</sup>H-NMR and <sup>13</sup>C-NMR) match with the literature.<sup>1</sup>

1.2 The compound **2b** was purchased from commercial suppliers (TCI) and used without further purification. The analytical data (<sup>1</sup>H-NMR and <sup>13</sup>C-NMR) of compound **2a** match with the literature.<sup>1</sup>

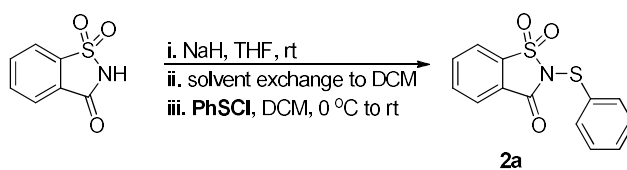

2.1 The substrates **1a**<sup>2</sup>, **1f-1g**<sup>2</sup>, **1m**<sup>2</sup>, **1i**<sup>3</sup>, **1b-1e**<sup>4</sup>, **1n**<sup>4</sup>, **1h**<sup>5</sup>, **1l**<sup>6</sup>, **1p**<sup>7</sup>, **1q**<sup>8</sup>, **5a**<sup>9</sup> and **5b**<sup>10</sup> are known compound. Analytical data (<sup>1</sup>H-NMR and <sup>13</sup>C-NMR) match with the literature.

**Figure S2.** The substrates examined in this manuscript

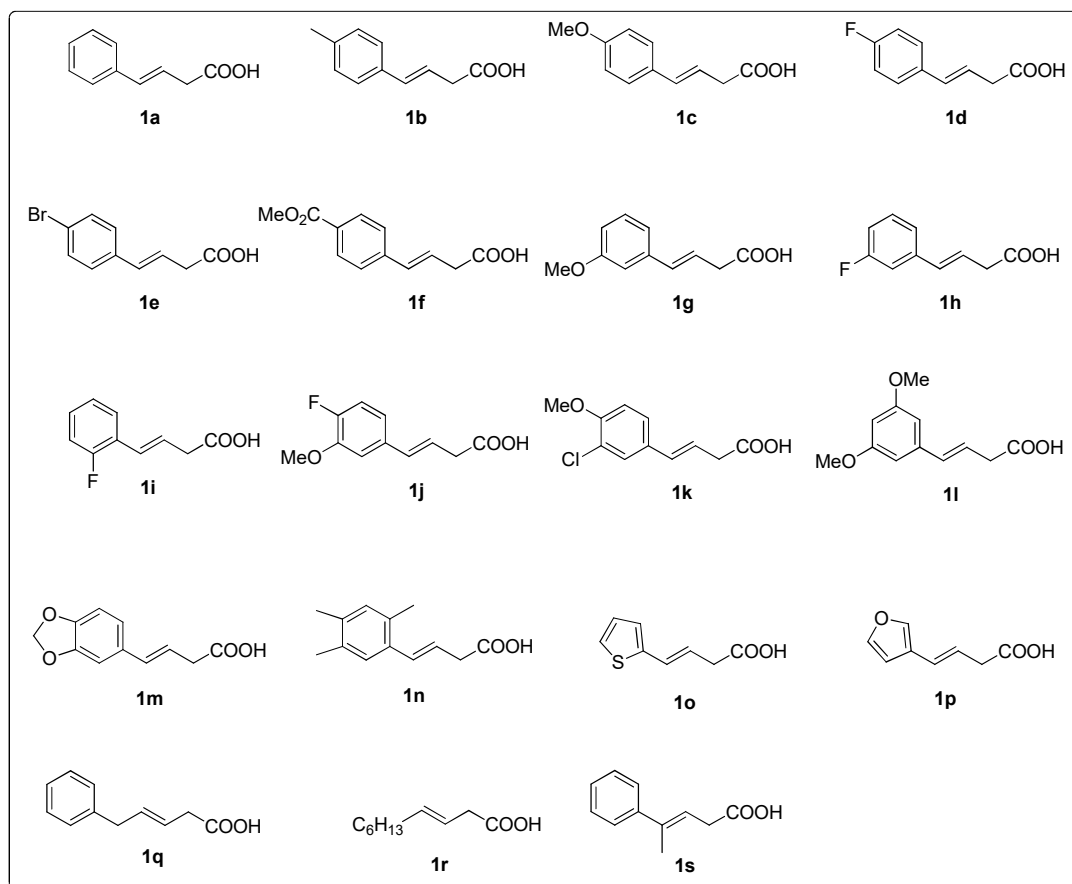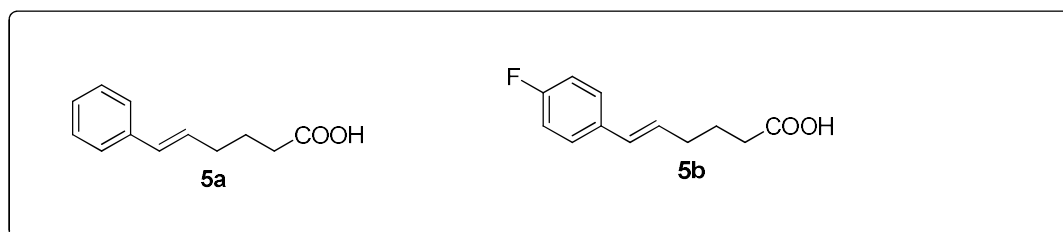

### Synthesis of **1j**, **1k** and **1p**

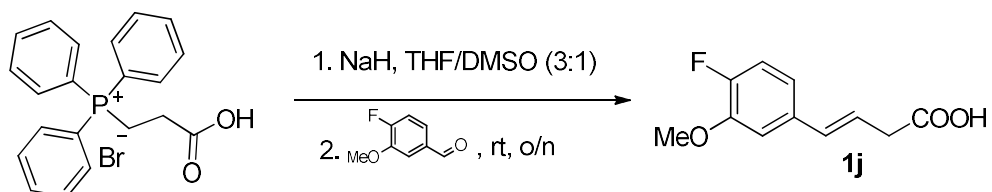

To a suspension of (2-carboxyethyl)triphenylphosphonium bromide (2.28 g, 5.5 mmol, 1.1 equiv) in anhydrous THF/DMSO (15 mL: 5 mL) was added sodium hydride (0.264 g, 11 mmol, 2.2 equiv) at room temperature under argon atmosphere. 5 mins later,

4-fluoro-3-methoxybenzaldehyde (0.770 g, 5.0 mmol, 1.0 equiv) was added. The mixture was stirred at room temperature overnight and monitored by TLC analysis and after completion of the reaction THF was evaporated. H<sub>2</sub>O (90 mL) and DCM (90 mL) was added. Aqueous layer was separated and acidified with HCl (1 M) up to pH = 2. Et<sub>2</sub>O (90 mL) was added. The layers were separated and the aqueous layer was extracted with Et<sub>2</sub>O (3 x 90 mL). The combined organic layers were dried over Na<sub>2</sub>SO<sub>4</sub> and the solvent was removed in vacuum (35 °C). After flash chromatography on silica gel (1:2 EtOAc:petroleum ether) gave the compound **1j** as a white solid (480 mg, 46% yield), R<sub>f</sub> = 0.15 (2:1 EtOAc:petroleum ether).

Data for **1j**: **Mp**: 64.2 ~65.1 °C. **<sup>1</sup>H NMR** (500 MHz, CDCl<sub>3</sub>, ppm): δ 7.11 – 6.93 (m, 2H), 6.88 (ddd, J = 8.1, 4.2, 1.9 Hz, 1H), 6.46 (d, J = 15.8 Hz, 1H), 6.28 – 6.05 (m, 1H), 3.90 (s, 3H), 3.29 (d, J = 7.1 Hz, 2H); **<sup>13</sup>C NMR** (126 MHz, CDCl<sub>3</sub>, ppm): δ 177.51, 152.31 (d, J = 247.0 Hz), 147.80 (d, J = 11.0 Hz), 133.30, 120.81 (d, J = 2.3 Hz), 119.37 (d, J = 6.8 Hz), 116.18 (d, J = 18.7 Hz), 111.11 (d, J = 1.7 Hz), 56.37, 37.98; **<sup>19</sup>F NMR** (376 MHz, CDCl<sub>3</sub>, ppm): δ -136.31; **HRMS** (ESI) m/z calcd. for C<sub>11</sub>H<sub>10</sub>FO<sub>3</sub> (M-H)<sup>-</sup>: 209.0595, found: 209.0591.

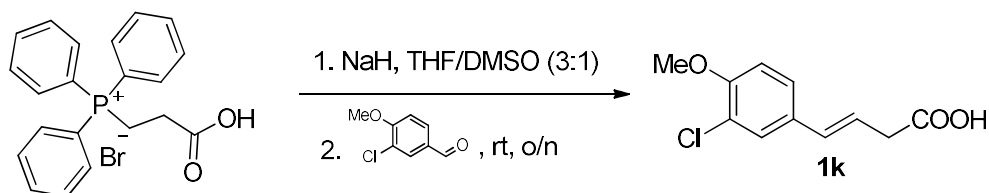

The same procedure as used for the synthesis of **1j** (above) was followed using (2-carboxyethyl)triphenylphosphonium bromide (2.28 g, 5.5 mmol, 1.1 equiv) in anhydrous THF/DMSO (15 mL: 5 mL), sodium hydride (264 mg, 11 mmol, 2.2 equiv), and 4-chloro-3-methoxybenzaldehyde (0.853 g, 5.0 mmol, 1.0 equiv). The alkenoic acid was purified over silica gel (1:2 EtOAc:petroleum ether) gave the compound **1k** as a white solid (450 mg, 40% yield), R<sub>f</sub> = 0.2 (1:2 EtOAc:petroleum ether).

Data for **1k**: **Mp**: 89.7 ~91.6 °C. **<sup>1</sup>H NMR** (500 MHz, CDCl<sub>3</sub>, ppm): δ 7.41 (d, J = 2.1 Hz, 1H), 7.21 (dd, J = 8.5, 2.1 Hz, 1H), 6.86 (d, J = 8.5 Hz, 1H), 6.40 (d, J = 15.9 Hz, 1H), 6.16 (dt, J = 15.8, 7.1 Hz, 1H), 3.90 (s, 3H), 3.28 (dd, J = 7.1, 1.1 Hz, 2H); **<sup>13</sup>C NMR** (126 MHz, CDCl<sub>3</sub>, ppm): δ 177.28, 154.66, 132.38, 130.56, 128.02, 126.00, 122.83, 120.24, 112.12, 56.35, 37.97;

**HRMS** (ESI)  $m/z$  calcd. for  $C_{11}H_{10}ClO_3$  (M-H): 225.0318, found: 225.0327 .

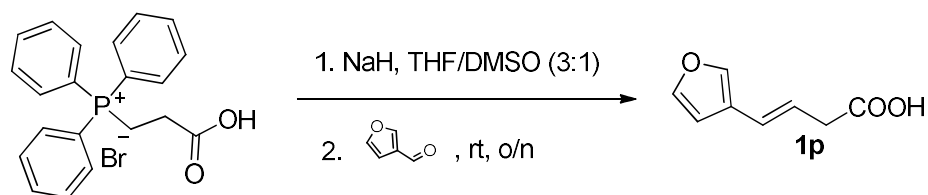

The same procedure as used for the synthesis of **1j** (above) was followed using (2-carboxyethyl)triphenylphosphonium bromide (2.28 g, 5.5 mmol, 1.1 equiv) in anhydrous THF/DMSO (15 mL: 5 mL), sodium hydride (264 mg, 11 mmol, 2.2 equiv), and 3-furaldehyde (0.481 g, 5.0 mmol, 1.0 equiv). The alkenoic acid was purified over silica gel (1:2 EtOAc:petroleum ether) gave the compound **1p** as a light yellow solid (450 mg, 54% yield),  $R_f = 0.2$  (1:2 EtOAc:petroleum ether).

Data for **1p**: **Mp**: 75.8 ~77.1 °C.  **$^1H$  NMR** (500 MHz,  $CDCl_3$ , ppm):  $\delta$  7.46 – 7.30 (m, 2H), 6.54 (dd,  $J = 1.0, 0.5$  Hz, 1H), 6.38 (d,  $J = 15.8$  Hz, 1H), 6.00 (m, 1H), 3.24 (dd,  $J = 7.2, 1.3$  Hz, 2H);  **$^{13}C$  NMR** (101 MHz,  $CDCl_3$ , ppm):  $\delta$  178.03, 143.70, 140.52, 123.92, 123.78, 120.43, 107.62, 38.04; **HRMS** (ESI)  $m/z$  calcd. for  $C_8H_7O_3$  (M-H): 151.0376, found: 151.0375.

## Product Purification/Characterization Data

### 3.1 General procedure for the enantioselective 5-*endo* thiolactonization (procedure A):

In a dry tube, unsaturated carboxylic acids **1a-r** (0.1 mmol, 1.0 equiv) and sulfenylating agent **2a** (0.12 mmol, 1.2 equiv), (*S*)-Cat. **4a** (0.01 mmol, 0.1 equiv) were added in DCM (1.0 mL) under argon atmosphere. After stirred for 5 min at corresponding temperature, methanesulfonic acid (0.1 mmol, 1.0 equiv) were added in one portion. The resulting mixture was stirred for another 15 h to 3 d at corresponding temperature. After the reaction was complete (monitored by TLC), the solvent was concentrated under reduced pressure, and the resulting residue was purified by flash column chromatography on silica gel (petroleum ether/EtOAc) to give the corresponding sulfenylated lactones.

The synthesis of 5-*endo* racemic sample was followed using unsaturated carboxylic acids **1** (0.1 mmol, 1.0 equiv) and sulfenylating agent **2a** (0.12 mmol, 1.2 equiv), methanesulfonic acid (0.1 mmol, 1.0 equiv) were added in DCM (1.0 mL) under argon atmosphere at room temperature for overnight.

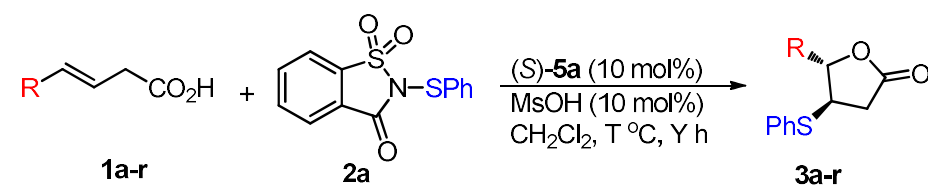

(4*R*, 5*S*)-5-phenyl-4-(phenylthio)dihydrofuran-2(3H)-one (**3a**):

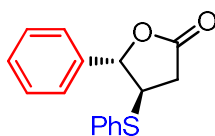

General procedure A was followed using (*E*)-4-phenylbut-3-enoic acid (**1a**, 16.2 mg, 0.1 mmol, 1.0 equiv) and 2-(phenylthio)benzo[*d*]isothiazol-3(2H)-one 1,1-dioxide (**2a**, 35 mg, 0.12

mmol, 1.2 equiv) stirred for 24 h at -5 °C. The crude mixture was purified by silica gel flash chromatography (1:20 EtOAc:petroleum ether) to afford product **3a** as a colorless oil (26.0 mg, 96% yield),  $R_f = 0.6$  (1:5 EtOAc:petroleum ether). **<sup>1</sup>H NMR** (400 MHz, CDCl<sub>3</sub>, ppm): δ 7.39 (m, 8H), 7.31 – 7.25 (m, 2H), 5.37 (d,  $J = 5.8$  Hz, 1H), 3.84 (ddd,  $J = 8.1, 7.0, 5.8$  Hz, 1H), 3.05 (dd,  $J = 18.0, 8.2$  Hz, 1H), 2.68 (dd,  $J = 18.0, 7.0$  Hz, 1H); **<sup>13</sup>C NMR** (101 MHz, CDCl<sub>3</sub>, ppm): δ 174.36, 137.52, 133.57, 131.88, 129.56, 128.98, 128.95, 128.73, 125.57, 85.30, 50.09, 35.57; **IR** (neat): 1787, 1479, 1439, 1261, 1223, 1164, 1141, 1025, 1001, 802, 749, 695 cm<sup>-1</sup>; **HRMS** (ESI)  $m/z$  calcd. for C<sub>16</sub>H<sub>14</sub>O<sub>2</sub>S (M+Na)<sup>+</sup>: 293.0612, found: 293.0611; separation of enantiomers by HPLC, Chiralcel® Column OD-H, 30 °C, n-hexane: *i*-PrOH = 90:10, 1 mL/min, major retention time: 16.04 min, minor retention time: 20.23 min, er = 96:4;  $[\alpha]_D^{20} = -35.2$  ( $c = 1.0$ , CHCl<sub>3</sub>).

(4*R*, 5*S*)-4-(phenylthio)-5-(*p*-tolyl)dihydrofuran-2(3*H*)-one (**3b**):

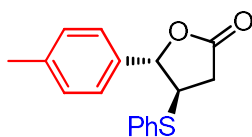

General procedure A was followed using (*E*)-4-(*p*-tolyl)but-3-enoic acid (**1b**, 17.6 mg, 0.1 mmol, 1.0 equiv) and 2-(phenylthio)benzo[*d*]isothiazol-3(2*H*)-one 1,1-dioxide (**2a**, 35 mg, 0.12 mmol, 1.2 equiv) stirred for 16 h at -5 °C. The crude mixture was purified by silica gel flash chromatography (1:25 EtOAc:petroleum ether) to afford product **3b** as a colorless oil (26.0 mg, 92% yield),  $R_f = 0.5$  (1:7 EtOAc:petroleum ether). **<sup>1</sup>H NMR** (500 MHz, CDCl<sub>3</sub>, ppm): δ 7.43 – 7.37 (m, 2H), 7.36 – 7.29 (m, 3H), 7.20 – 7.12 (m, 4H), 5.30 (t,  $J = 4.6$  Hz, 1H), 3.80 (ddd,  $J = 8.0, 7.0, 5.9$  Hz, 1H), 3.02 (dd,  $J = 18.0, 8.2$  Hz, 1H), 2.64 (dd,  $J = 18.0, 7.0$  Hz, 1H), 2.35 (s, 3H); **<sup>13</sup>C NMR** (126 MHz, CDCl<sub>3</sub>, ppm): δ 174.46, 138.94, 134.49, 133.56, 131.94, 129.61, 129.55, 128.68, 125.60, 85.34, 50.06, 35.69, 21.30; **IR** (neat): 2923, 1787, 1439, 1261, 1165, 1141, 1024, 800, 748, 692 cm<sup>-1</sup>; **HRMS** (ESI)  $m/z$  calcd. for C<sub>17</sub>H<sub>16</sub>NaO<sub>2</sub>S (M+Na)<sup>+</sup>: 307.0769, found: 307.0766; separation of enantiomers by HPLC, Chiralcel® Column OD-H, 30 °C, n-hexane: *i*-PrOH = 90:10, 1 mL/min, major retention time: 14.52 min, minor retention time: 17.74 min, er = 95.5:4.5;  $[\alpha]_D^{20} = -44.2$  ( $c = 1.0$ , CHCl<sub>3</sub>).



(4*R*, 5*S*)-5-(4-methoxyphenyl)-4-(phenylthio)dihydrofuran-2(3*H*)-one (**3c**):

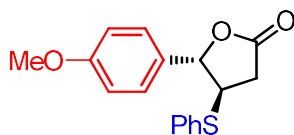

General procedure A was followed using (*E*)-4-(4-methoxyphenyl)but-3-enoic acid (**1c**, 19.2 mg, 0.1 mmol, 1.0 equiv) and 2-(phenylthio)benzo[*d*]isothiazol-3(2*H*)-one 1,1-dioxide (**2a**, 35 mg, 0.12 mmol, 1.2 equiv) stirred for 25 h at -10 °C. The crude mixture was purified by silica gel flash chromatography (1:10 EtOAc:petroleum ether) to afford product **3c** as a white solid (23.0 mg, 77% yield),  $R_f = 0.4$  (1:5 EtOAc:petroleum ether). **Mp**: 80.8 ~ 82.5 °C. **<sup>1</sup>H NMR** (500 MHz, CDCl<sub>3</sub>, ppm): 7.52 – 7.40 (m, 2H), 7.40 – 7.32 (m, 3H), 7.29 (dd, *J* = 10.6, 5.3 Hz, 1H), 6.94 – 6.82 (m, 2H), 6.77 (d, *J* = 1.8 Hz, 1H), 5.34 (d, *J* = 5.5 Hz, 1H), 3.84 (ddd, *J* = 8.2, 6.6, 5.7 Hz, 1H), 3.80 (s, 3H), 3.04 (dd, *J* = 18.0, 8.2 Hz, 1H), 2.66 (dd, *J* = 18.0, 6.6 Hz, 1H); **<sup>13</sup>C NMR** (126 MHz, CDCl<sub>3</sub>, ppm): δ 174.41, 160.04, 139.18, 133.62, 131.94, 130.10, 129.59, 128.77, 117.64, 114.46, 111.00, 85.13, 55.44, 50.05, 35.42; **IR** (neat): 2961, 2925, 1787, 1603, 1439, 1291, 1263, 1142, 800, 748, 692 cm<sup>-1</sup>; **HRMS** (ESI) *m/z* calcd. for C<sub>17</sub>H<sub>16</sub>NaO<sub>3</sub>S (M+Na)<sup>+</sup>: 323.0718, found:323.0716; separation of enantiomers by HPLC, Chiralcel® Column OD-H, 30 °C, n-hexane: *i*-PrOH = 90:10, 1 mL/min, major retention time: 16.82 min, minor retention time: 30.81 min, er = 95.5:4.5;  $[\alpha]_D^{20} = -40.2$  (*c* = 1.0, CHCl<sub>3</sub>).

(4*R*, 5*S*)-5-(4-fluorophenyl)-4-(phenylthio)dihydrofuran-2(3*H*)-one (**3d**):

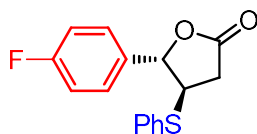

General procedure A was followed using (*E*)-4-(4-fluorophenyl)but-3-enoic acid (**1d**, 18.0 mg, 0.1 mmol, 1.0 equiv) and 2-(phenylthio)benzo[*d*]isothiazol-3(2*H*)-one 1,1-dioxide (**2a**, 35 mg, 0.12 mmol, 1.2 equiv) stirred for 33 h at -5 °C. The crude mixture was purified by silica gel flash chromatography (1:12 EtOAc:petroleum ether) to afford product **3d** as a colorless oil (24.0 mg, 83% yield),  $R_f = 0.5$  (1:5 EtOAc:petroleum ether). **<sup>1</sup>H NMR** (500 MHz, CDCl<sub>3</sub>, ppm): δ 7.47 – 7.37 (m, 2H), 7.34 (dd, *J* = 5.0, 1.8 Hz, 3H), 7.30 – 7.22 (m, 2H), 7.07 (t, *J* = 8.6 Hz, 2H),

5.32 (d,  $J = 6.5$  Hz, 1H), 3.78 (td,  $J = 8.0, 6.6$  Hz, 1H), 3.04 (dd,  $J = 18.0, 8.2$  Hz, 1H), 2.69 (dd,  $J = 18.0, 7.9$  Hz, 1H);  $^{13}\text{C}$  NMR (126MHz,  $\text{CDCl}_3$ , ppm):  $\delta$  173.99, 163.01 (d,  $J = 248.1$  Hz), 133.64, 133.21 (d,  $J = 3.2$  Hz), 131.61, 129.60, 128.85, 127.63 (d,  $J = 8.4$  Hz), 115.94 (d,  $J = 21.8$  Hz), 84.85, 50.19, 35.76;  $^{19}\text{F}$  NMR (471 MHz,  $\text{CDCl}_3$ , ppm):  $\delta$  -112.50; IR (neat): 1789, 1607, 1512, 1228, 1158, 1142, 1025, 1001, 853, 837, 748, 692  $\text{cm}^{-1}$ ; HRMS (ESI)  $m/z$  calcd. for  $\text{C}_{16}\text{H}_{13}\text{FNaO}_2\text{S}$  ( $\text{M}+\text{Na}$ ) $^+$ : 311.0518, found 311.0511; separation of enantiomers by HPLC, Chiralcel® Column OD-H, 30 °C, n-hexane: *i*-PrOH = 90:10, 1 mL/min, major retention time: 21.81 min, minor retention time: 27.29 min, er = 95:5;  $[\alpha]_{\text{D}}^{20} = -18.6$  ( $c = 1.0, \text{CHCl}_3$ ).

(4*R*, 5*S*)-5-(4-bromophenyl)-4-(phenylthio)dihydrofuran-2(3*H*)-one (**3e**):

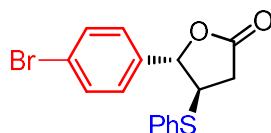

General procedure A was followed using (*E*)-4-(4-bromophenyl)but-3-enoic acid (**1e**, 24.1 mg, 0.1 mmol, 1.0 equiv) and 2-(phenylthio)benzo[*d*]isothiazol-3(2*H*)-one 1,1-dioxide (**2a**, 35 mg, 0.12 mmol, 1.2 equiv) stirred for 28 h at -5 °C. The crude mixture was purified by silica gel flash chromatography (1:20 EtOAc:petroleum ether) to afford product **3e** as a white solid (21.0 mg, 61% yield),  $R_f = 0.2$  (1:20 EtOAc:petroleum ether). **Mp**: 63.8 ~65.7 °C.  $^1\text{H}$  NMR (400 MHz,  $\text{CDCl}_3$ , ppm):  $\delta$  7.52 – 7.44 (m, 2H), 7.43 – 7.36 (m, 2H), 7.37 – 7.29 (m, 3H), 7.20 – 7.09 (m, 2H), 5.26 (d,  $J = 6.3$  Hz, 1H), 3.74 (td,  $J = 7.9, 6.4$  Hz, 1H), 3.00 (dd,  $J = 18.0, 8.2$  Hz, 1H), 2.66 (dd,  $J = 18.0, 7.7$  Hz, 1H);  $^{13}\text{C}$  NMR (101 MHz,  $\text{CDCl}_3$ , ppm):  $\delta$  173.89, 136.47, 133.64, 132.03, 131.49, 129.59, 128.85, 127.31, 123.00, 84.58, 50.01, 35.59; IR (neat): 2962, 2925, 2854, 1789, 1261, 1094, 1022, 800  $\text{cm}^{-1}$ ; HRMS (ESI)  $m/z$  calcd. for  $\text{C}_{16}\text{H}_{13}\text{BrNaO}_2\text{S}$  ( $\text{M}+\text{Na}$ ) $^+$ : 370.9717, found: 370.9712; separation of enantiomers by HPLC, Chiralcel® Column OD-H, 30 °C, n-hexane: *i*-PrOH = 90:10, 1 mL/min, major retention time: 27.20 min, minor retention time: 31.40 min, er = 94.5:5.5;  $[\alpha]_{\text{D}}^{20} = -47.0$  ( $c = 1.0, \text{CHCl}_3$ ).

Methyl 4-((2*S*, 3*R*)-5-oxo-3-(phenylthio)tetrahydrofuran-2-yl)benzoate (**3f**):

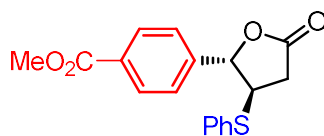

General procedure A was followed using (*E*)-4-(4-(methoxycarbonyl)phenyl)but-3-enoic acid (**1f**, 22.0 mg, 0.1 mmol, 1.0 equiv) and 2-(phenylthio)benzo[*d*]isothiazol-3(2H)-one 1,1-dioxide (**2a**, 35 mg, 0.12 mmol, 1.2 equiv) stirred for 3 d at 0 °C. The crude mixture was purified by silica gel flash chromatography (1:25 EtOAc:petroleum ether) to afford product **3f** as a white solid (15.0 mg, 46% yield),  $R_f = 0.6$  (1:5 EtOAc:petroleum ether). **Mp**: 73.6 ~75.1 °C. **<sup>1</sup>H NMR** (400 MHz, CDCl<sub>3</sub>, ppm): δ 8.21 – 7.82 (m, 2H), 7.40 (d, *J* = 3.6 Hz, 2H), 7.37 – 7.29 (m, 5H), 5.37 (d, *J* = 6.0 Hz, 1H), 3.92 (s, 3H), 3.77 (ddd, *J* = 8.2, 7.3, 6.0 Hz, 1H), 3.01 (dd, *J* = 18.0, 8.3 Hz, 1H), 2.67 (dd, *J* = 18.0, 7.2 Hz, 1H); **<sup>13</sup>C NMR** (101 MHz, CDCl<sub>3</sub>, ppm): δ 173.97, 166.53, 142.43, 133.77, 131.54, 130.74, 130.20, 129.67, 128.99, 125.53, 84.66, 52.39, 50.14, 35.50; **IR** (neat): 2923, 1789, 1722, 1613, 1437, 1281, 1183, 1111, 1002, 750, 693 cm<sup>-1</sup>; **HRMS** (ESI) *m/z* calcd. for C<sub>18</sub>H<sub>16</sub>NaO<sub>4</sub>S (M+Na)<sup>+</sup>: 351.0667, found: 351.0679; separation of enantiomers by HPLC, Chiralcel® Column OD-H, 30 °C, *n*-hexane: *i*-PrOH = 88:12, 1 mL/min, major retention time: 32.00 min, minor retention time: 38.99 min, er = 94.5:5.5; [ $\alpha$ ]<sub>D</sub><sup>20</sup> = -30.6 (*c* = 1.0, CHCl<sub>3</sub>).

(4*R*, 5*S*)-5-(3-methoxyphenyl)-4-(phenylthio)dihydrofuran-2(3H)-one (**3g**):

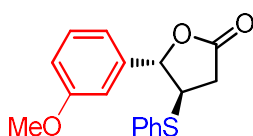

General procedure A was followed using (*E*)-4-(3-methoxyphenyl)but-3-enoic acid (**1g**, 19.2 mg, 0.1 mmol, 1.0 equiv) and 2-(phenylthio)benzo[*d*]isothiazol-3(2H)-one 1,1-dioxide (**2a**, 35 mg, 0.12 mmol, 1.2 equiv) stirred for 24 h at -40 °C. The crude mixture was purified by silica gel flash chromatography (1:15 EtOAc:petroleum ether) to afford product **3g** as a white solid (28.5 mg, 95% yield),  $R_f = 0.5$  (1:5 EtOAc:petroleum ether). **Mp**: 91.1 ~93.5 °C. **<sup>1</sup>H NMR** (500 MHz, CDCl<sub>3</sub>) δ 7.41 – 7.35 (m, 2H), 7.32 (dd, *J* = 6.7, 3.5 Hz, 3H), 7.23 – 7.13 (m, 2H), 6.97 – 6.78 (m, 2H), 5.28 (d, *J* = 6.3 Hz, 1H), 3.98 – 3.39 (m, 4H), 3.02 (dd, *J* = 17.9, 8.1 Hz,

1H), 2.65 (dd,  $J = 17.9, 7.6$  Hz, 1H);  $^{13}\text{C}$  NMR (126 MHz,  $\text{CDCl}_3$ , ppm):  $\delta$  174.33, 160.16, 133.53, 131.90, 129.53, 129.29, 128.66, 127.22, 114.32, 85.37, 55.48, 50.04, 35.89; **IR** (neat): 1786, 1613, 1516, 1252, 1226, 1176, 1141, 1028, 803  $\text{cm}^{-1}$ ; **HRMS** (ESI)  $m/z$  calcd. for  $\text{C}_{17}\text{H}_{16}\text{NaO}_3\text{S}$  ( $\text{M}+\text{Na}$ ) $^+$ : 323.0718, found: 323.0715; separation of enantiomers by HPLC, Chiralcel® Column OD-H, 30 °C, n-hexane: *i*-PrOH = 88:12, 1 mL/min, major retention time: 24.18 min, minor retention time: 27.29 min, er = 96:4;  $[\alpha]_{\text{D}}^{20} = -46.8$  ( $c = 1.0, \text{CHCl}_3$ ).

(4*R*, 5*S*)-5-(3-fluorophenyl)-4-(phenylthio)dihydrofuran-2(3*H*)-one (**3h**):

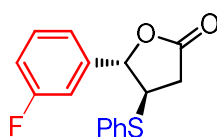

General procedure A was followed using (*E*)-4-(3-fluorophenyl)but-3-enoic acid (**1h**, 18.0 mg, 0.1 mmol, 1.0 equiv) and 2-(phenylthio)benzo[*d*]isothiazol-3(2*H*)-one 1,1-dioxide (**2a**, 35 mg, 0.12 mmol, 1.2 equiv) stirred for 41 h at 5 °C. The crude mixture was purified by silica gel flash chromatography (1:10 EtOAc:petroleum ether) to afford product **3h** as a white solid (23.0 mg, 80% yield),  $R_f = 0.4$  (1:5 EtOAc:petroleum ether). **Mp**: 86.8 ~88.9 °C.  $^1\text{H}$  NMR (500 MHz,  $\text{CDCl}_3$ , ppm):  $\delta$  7.48 – 7.44 (m, 2H), 7.35 (m, 4H), 7.29 – 7.24 (m, 1H), 7.16 (t,  $J = 7.6$  Hz, 1H), 7.12 – 7.05 (m, 1H), 5.58 (d,  $J = 5.3$  Hz, 1H), 3.97 (dt,  $J = 8.0, 5.9$  Hz, 1H), 3.06 (dd,  $J = 18.0, 8.2$  Hz, 1H), 2.66 (dd,  $J = 18.0, 6.4$  Hz, 1H);  $^{13}\text{C}$  NMR (126 MHz,  $\text{CDCl}_3$ , ppm):  $\delta$  174.36, 160.22 (d,  $J = 248.5$  Hz), 133.97, 131.37, 130.95 (d,  $J = 8.3$  Hz), 129.47, 128.86, 127.67 (d,  $J = 3.5$  Hz), 124.81 (d,  $J = 12.5$  Hz), 124.64 (d,  $J = 3.6$  Hz), 116.14 (d,  $J = 21.0$  Hz), 81.10 (d,  $J = 2.0$  Hz), 48.68, 35.27;  $^{19}\text{F}$  NMR (471 MHz,  $\text{CDCl}_3$ , ppm):  $\delta$  -116.47; **IR** (neat): 1789, 1586, 1492, 1459, 1440, 1238, 1222, 1183, 1143, 1025, 1001, 758, 692  $\text{cm}^{-1}$ ; **HRMS** (ESI)  $m/z$  calcd. for  $\text{C}_{16}\text{H}_{13}\text{FNaO}_2\text{S}$  ( $\text{M}+\text{Na}$ ) $^+$ : 311.0518, found: 311.0526; separation of enantiomers by HPLC, Chiralcel® Column OD-H, 30 °C, n-hexane: *i*-PrOH = 90:10, 1 mL/min, major retention time: 15.67 min, minor retention time: 18.43 min, er = 95.5:4.5;  $[\alpha]_{\text{D}}^{20} = -34.4$  ( $c = 1.0, \text{CHCl}_3$ ).

(4*R*, 5*S*)-5-(2-fluorophenyl)-4-(phenylthio)dihydrofuran-2(3*H*)-one (**3i**):

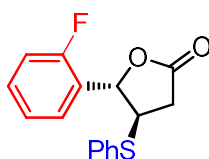

General procedure A was followed using (*E*)-4-(2-fluorophenyl)but-3-enoic acid (**1i**, 18.0 mg, 0.1 mmol, 1.0 equiv) and 2-(phenylthio)benzo[*d*]isothiazol-3(2H)-one 1,1-dioxide (**2a**, 35 mg, 0.12 mmol, 1.2 equiv) stirred for 41 h at 5 °C. The crude mixture was purified by silica gel flash chromatography (1:12 EtOAc:petroleum ether) to afford product **3i** as a colorless oil (27.0 mg, 94% yield),  $R_f = 0.5$  (1:5 EtOAc:petroleum ether).  $^1\text{H NMR}$  (500 MHz,  $\text{CDCl}_3$ , ppm):  $\delta$  7.42 (dd,  $J = 6.5, 3.0$  Hz, 2H), 7.39 – 7.29 (m, 4H), 7.11 – 7.00 (m, 2H), 6.96 (dd,  $J = 9.5, 1.8$  Hz, 1H), 5.31 (d,  $J = 5.9$  Hz, 1H), 3.77 (td,  $J = 7.3, 6.1$  Hz, 1H), 3.01 (dd,  $J = 18.0, 8.2$  Hz, 1H), 2.66 (dd,  $J = 18.0, 7.2$  Hz, 1H);  $^{13}\text{C NMR}$  (126 MHz,  $\text{CDCl}_3$ , ppm):  $\delta$  173.98, 163.00 (d,  $J = 247.6$  Hz), 140.10 (d,  $J = 7.1$  Hz), 133.77, 131.55, 130.66 (d,  $J = 8.3$  Hz), 129.66 (s), 128.97, 121.19 (d,  $J = 3.0$  Hz), 115.94 (d,  $J = 21.0$  Hz), 112.73 (d,  $J = 22.9$  Hz), 84.46 (d,  $J = 1.9$  Hz), 50.08, 35.45;  $^{19}\text{F NMR}$  (471 MHz,  $\text{CDCl}_3$ , ppm):  $\delta$  -111.54; **IR** (neat): 2924, 1789, 1592, 1453, 1261, 1139, 1025, 800, 748, 691  $\text{cm}^{-1}$ ; **HRMS** (ESI)  $m/z$  calcd. for  $\text{C}_{16}\text{H}_{13}\text{FNaO}_2\text{S}$  ( $\text{M}+\text{Na}$ ) $^+$ : 311.0518, found : 311.0524; separation of enantiomers by HPLC, Chiralcel® Column OD-H, 30 °C, n-hexane: *i*-PrOH = 90:10, 1 mL/min, major retention time: 19.11 min, minor retention time: 22.53 min, er = 94.5:5.5;  $[\alpha]_{\text{D}}^{20} = -36.8$  ( $c = 1.0, \text{CHCl}_3$ ).

(4*R*, 5*S*)-5-(4-fluoro-3-methoxyphenyl)-4-(phenylthio)dihydrofuran-2(3H)-one (**3j**):

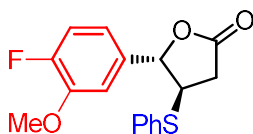

General procedure A was followed using (*E*)-4-(4-fluoro-3-methoxyphenyl)but-3-enoic acid (**1j**, 21.0 mg, 0.1 mmol, 1.0 equiv) and 2-(phenylthio)benzo[*d*]isothiazol-3(2H)-one 1,1-dioxide (**2a**, 35 mg, 0.12 mmol, 1.2 equiv) stirred for 24 h at -5 °C. The crude mixture was purified by silica gel flash chromatography (1:10 EtOAc:petroleum ether) to afford product **3j** as a colorless oil (24.0 mg, 76% yield),  $R_f = 0.4$  (1:5 EtOAc:petroleum ether).  $^1\text{H NMR}$  (500 MHz,  $\text{CDCl}_3$ , ppm):  $\delta$  7.44 – 7.36 (m, 2H), 7.37 – 7.28 (m, 3H), 7.04 (dd,  $J = 10.9, 8.3$  Hz, 1H),

6.80 (ddd,  $J = 12.5, 6.9, 2.0$  Hz, 2H), 5.29 (d,  $J = 6.3$  Hz, 1H), 3.84 (s, 3H), 3.77 (td,  $J = 7.9, 6.4$  Hz, 1H), 3.03 (dd,  $J = 18.0, 8.3$  Hz, 1H), 2.67 (dd,  $J = 18.0, 7.7$  Hz, 1H);  $^{13}\text{C}$  NMR (126 MHz,  $\text{CDCl}_3$ , ppm):  $\delta$  173.98, 163.00 (d,  $J = 247.6$  Hz), 140.10 (d,  $J = 7.1$  Hz), 133.77, 131.55, 130.66 (d,  $J = 8.3$  Hz), 129.66, 128.97, 121.19 (d,  $J = 3.0$  Hz), 115.94 (d,  $J = 21.0$  Hz), 112.73 (d,  $J = 22.9$  Hz), 84.46 (d,  $J = 1.9$  Hz), 50.08, 35.45;  $^{19}\text{F}$  NMR (471 MHz,  $\text{CDCl}_3$ , ppm):  $\delta$  -134.48; IR (neat): 1789, 1520, 1466, 1283, 1263, 1215, 1164, 1142, 1121, 1091, 1028, 808, 746,  $693\text{cm}^{-1}$ ; HRMS (ESI)  $m/z$  calcd. for  $\text{C}_{17}\text{H}_{15}\text{FNaO}_3\text{S}$  ( $\text{M}+\text{Na}$ ) $^+$ : 341.0624, found: 341.0627; separation of enantiomers by HPLC, Chiralcel® Column OJ-H, 30 °C, n-hexane: *i*-PrOH = 90:10, 1 mL/min, minor retention time: 66.86 min, major retention time: 70.33 min, er = 3.5:96.5;  $[\alpha]_{\text{D}}^{20} = -29.8$  ( $c = 1.0, \text{CHCl}_3$ ).

(4*R*, 5*S*)-5-(3-chloro-4-methoxyphenyl)-4-(phenylthio)dihydrofuran-2(3*H*)-one (**3k**):

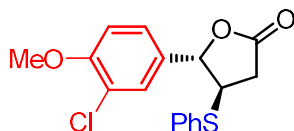

General procedure A was followed using (*E*)-4-(3-chloro-4-methoxyphenyl)but-3-enoic acid (**1k**, 22.7 mg, 0.1 mmol, 1.0 equiv) and 2-(phenylthio)benzo[*d*]isothiazol-3(2*H*)-one 1,1-dioxide (**2a**, 35 mg, 0.12 mmol, 1.2 equiv) stirred for 24 h at -20 °C. The crude mixture was purified by silica gel flash chromatography (1:5 EtOAc:petroleum ether) to afford product **3k** as a white solid (30.0 mg, 90% yield),  $R_f = 0.3$  (1:5 EtOAc:petroleum ether). **Mp**: 62.9 ~64.7 °C.  $^1\text{H}$  NMR (500 MHz,  $\text{CDCl}_3$ , ppm):  $\delta$  7.44 – 7.36 (m, 2H), 7.33 (dd,  $J = 4.2, 2.4$  Hz, 3H), 7.28 – 7.22 (m, 1H), 7.17 – 7.06 (m, 1H), 6.89 (d,  $J = 8.5$  Hz, 1H), 5.23 (d,  $J = 6.5$  Hz, 1H), 3.90 (s, 3H), 3.76 (dd,  $J = 8.0, 1.5$  Hz, 1H), 3.02 (dd,  $J = 18.0, 8.2$  Hz, 1H), 2.66 (dd,  $J = 18.0, 7.9$  Hz, 1H);  $^{13}\text{C}$  NMR (126 MHz,  $\text{CDCl}_3$ , ppm):  $\delta$  173.95, 155.53, 133.73, 131.56, 130.38, 129.61, 128.90, 127.81, 125.41, 123.09, 112.18, 84.64, 56.39, 50.03, 35.78. IR (neat): 1787, 1607, 1505, 1440, 1297, 1221, 1182, 1137, 1065, 1023, 806, 748,  $692\text{cm}^{-1}$ ; HRMS (ESI)  $m/z$  calcd. for  $\text{C}_{17}\text{H}_{15}\text{ClNaO}_3\text{S}$  ( $\text{M}+\text{Na}$ ) $^+$ : 357.0328, found: 357.0331; separation of enantiomers by HPLC, Chiralcel® Column IC, 30 °C, n-hexane: *i*-PrOH = 88:12, 1 mL/min, minor retention time: 29.36 min, major retention time: 38.76 min, er = 5:95;  $[\alpha]_{\text{D}}^{20} = -43.2$  ( $c = 1.0, \text{CHCl}_3$ ).

(4*R*, 5*S*)-5-(3, 5-dimethoxyphenyl)-4-(phenylthio)dihydrofuran-2(3*H*)-one (**3I**):

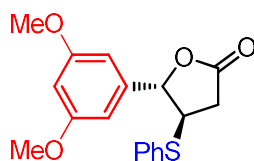

General procedure A was followed using (*E*)-4-(3,5-dimethoxyphenyl)but-3-enoic acid (**1I**, 22.2 mg, 0.1 mmol, 1.0 equiv) and 2-(phenylthio)benzo[*d*]isothiazol-3(2*H*)-one 1,1-dioxide (**2a**, 35 mg, 0.12 mmol, 1.2 equiv) stirred for 45 h at -5 °C. The crude mixture was purified by silica gel flash chromatography (1:5 EtOAc:petroleum ether) to afford product **3I** as a white solid (18.0 mg, 55% yield),  $R_f = 0.3$  (1:5 EtOAc:petroleum ether). **Mp**: 80.8 ~81.6 °C. **<sup>1</sup>H NMR** (500 MHz, CDCl<sub>3</sub>, ppm):  $\delta$  7.48 – 7.41 (m, 2H), 7.34 (dd,  $J = 5.0, 1.8$  Hz, 3H), 6.40 (t,  $J = 2.2$  Hz, 1H), 6.35 (d,  $J = 2.0$  Hz, 2H), 5.29 (d,  $J = 5.2$  Hz, 1H), 3.86 – 3.78 (m, 1H), 3.75 (s, 6H), 3.01 (dd,  $J = 18.1, 8.3$  Hz, 1H), 2.62 (dd,  $J = 18.1, 6.3$  Hz, 1H); **<sup>13</sup>C NMR** (125 MHz, CDCl<sub>3</sub>, ppm):  $\delta$  174.45, 161.30, 140.07, 133.68, 132.03, 129.61, 128.80, 103.29, 100.69, 85.16, 55.57, 50.02, 35.29; **IR** (neat): 2962, 1788, 1599, 1465, 1431, 1261, 1206, 1157, 1092, 1064, 1024, 802, 693 cm<sup>-1</sup>; **HRMS** (ESI)  $m/z$  calcd. for C<sub>18</sub>H<sub>18</sub>NaO<sub>4</sub>S (M+Na)<sup>+</sup>: 353.0823, found: 353.0821; separation of enantiomers by HPLC, Chiralcel® Column OD-H, 30 °C, n-hexane: *i*-PrOH = 70:30, 1 mL/min, major retention time: 11.51 min, minor retention time: 22.71 min, er = 95.5:4.5;  $[\alpha]_D^{20} = -39.0$  ( $c = 1.0$ , CHCl<sub>3</sub>).

(4*R*, 5*S*)-5-(benzo[*d*][1,3]dioxol-5-yl)-4-(phenylthio)dihydrofuran-2(3*H*)-one (**3m**):

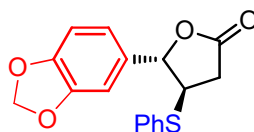

General procedure A was followed using (*E*)-4-(benzo[*d*][1,3]dioxol-5-yl)but-3-enoic acid (**1m**, 20.6 mg, 0.1 mmol, 1.0 equiv) and 2-(phenylthio)benzo[*d*]isothiazol-3(2*H*)-one 1,1-dioxide (**2a**, 35 mg, 0.12 mmol, 1.2 equiv) stirred for 15 h at -45 °C. The crude mixture was purified by silica gel flash chromatography (1:5 EtOAc:petroleum ether) to afford product **3m** as a white solid (31.0 mg, 99% yield),  $R_f = 0.3$  (1:5 EtOAc:petroleum ether). **Mp**: 70.9 ~72.5 °C. **<sup>1</sup>H NMR** (500 MHz, CDCl<sub>3</sub>, ppm):  $\delta$  7.39 (m, 2H), 7.35 – 7.28 (m, 3H), 6.83 – 6.55 (m, 3H),

5.97 (s, 2H), 5.22 (d,  $J = 6.3$  Hz, 1H), 3.76 (td,  $J = 7.9, 6.3$  Hz, 1H), 3.01 (dd,  $J = 17.9, 8.2$  Hz, 1H), 2.64 (dd,  $J = 17.9, 7.6$  Hz, 1H);  $^{13}\text{C}$  NMR (126 MHz,  $\text{CDCl}_3$ , ppm):  $\delta$  174.14, 148.26, 148.23, 131.77, 131.08, 129.56, 128.75, 119.73, 108.52, 106.13, 101.51, 85.40, 50.09, 35.79; IR (neat): 2918, 1787, 1504, 1448, 1253, 1142, 1038, 934, 804, 748,  $692\text{cm}^{-1}$ ; HRMS (ESI)  $m/z$  calcd. for  $\text{C}_{17}\text{H}_{14}\text{NaO}_4\text{S}$  ( $\text{M}+\text{Na}$ ) $^+$ : 337.0510, found: 337.0509; separation of enantiomers by HPLC, Chiralcel® Column OD-H,  $30^\circ\text{C}$ , n-hexane: *i*-PrOH = 90:10, 1 mL/min, major retention time: 29.18 min, minor retention time: 34.48 min, er = 93.5:6.5;  $[\alpha]_{\text{D}}^{20} = -51.2$  ( $c = 1.0$ ,  $\text{CHCl}_3$ ). (4*R*, 5*S*)-4-(phenylthio)-5-(2,4,5-trimethylphenyl)dihydrofuran-2(3H)-one (**3n**):

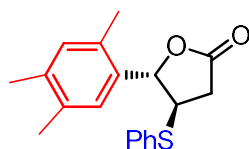

General procedure A was followed using (*E*)-4-(2,4,5-trimethylphenyl)but-3-enoic acid (**1n**, 20.4 mg, 0.1 mmol, 1.0 equiv) and 2-(phenylthio)benzo[*d*]isothiazol-3(2H)-one 1,1-dioxide (**2a**, 35 mg, 0.12 mmol, 1.2 equiv) stirred for 24 h at  $-20^\circ\text{C}$ . The crude mixture was purified by silica gel flash chromatography (1:35 EtOAc:petroleum ether) to afford product **3n** as a yellow solid (29.0 mg, 93% yield),  $R_f = 0.6$  (1:5 EtOAc:petroleum ether). **Mp**:  $84.7 \sim 86.4^\circ\text{C}$ .  $^1\text{H}$  NMR (400 MHz,  $\text{CDCl}_3$ , ppm):  $\delta$  7.40 (m,  $J = 6.6, 3.0$  Hz, 2H), 7.35 – 7.27 (m, 3H), 6.95 (d,  $J = 8.5$  Hz, 2H), 5.57 (d,  $J = 4.4$  Hz, 1H), 3.83 (dt,  $J = 7.9, 4.8$  Hz, 1H), 3.03 (dd,  $J = 18.0, 7.9$  Hz, 1H), 2.63 (dd,  $J = 18.0, 5.1$  Hz, 1H), 2.21 (d,  $J = 2.2$  Hz, 6H), 2.17 (s, 3H);  $^{13}\text{C}$  NMR (101 MHz,  $\text{CDCl}_3$ , ppm):  $\delta$  175.10, 137.27, 134.68, 133.48, 132.84, 132.51, 132.45, 132.23, 129.47, 128.62, 125.91, 82.94, 49.23, 35.65, 19.49, 19.42, 18.60; IR (neat): 3445, 2921, 1786, 1773, 1632, 1166, 1046, 748,  $693\text{cm}^{-1}$ ; HRMS (ESI)  $m/z$  calcd. for  $\text{C}_{19}\text{H}_{20}\text{NaO}_2\text{S}$  ( $\text{M}+\text{Na}$ ) $^+$ : 335.1082, found: 335.1077; separation of enantiomers by HPLC, Chiralcel® Column OD-H,  $30^\circ\text{C}$ , n-hexane: *i*-PrOH = 95:5, 1 mL/min, minor retention time: 17.43 min, major retention time: 21.66 min, er = 6.5:93.5;  $[\alpha]_{\text{D}}^{20} = -51.0$  ( $c = 1.0$ ,  $\text{CHCl}_3$ ).

(4*R*, 5*R*)-4-(phenylthio)-5-(thiophen-2-yl)dihydrofuran-2(3H)-one (**3o**):



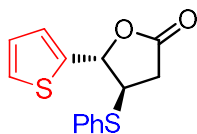

General procedure A was followed using (*E*)-4-(thiophen-2-yl)but-3-enoic acid (**1o**, 16.8 mg, 0.1 mmol, 1.0 equiv) and 2-(phenylthio)benzo[*d*]isothiazol-3(2H)-one 1,1-dioxide (**2a**, 35 mg, 0.12 mmol, 1.2 equiv) stirred for 11 h at -5 °C. The crude mixture was purified by silica gel flash chromatography (1:5 EtOAc:petroleum ether) to afford product **3o** as a colorless oil (27.0 mg, 98% yield),  $R_f = 0.3$  (1:5 EtOAc:petroleum ether). **<sup>1</sup>H NMR** (500 MHz, CDCl<sub>3</sub>, ppm): δ 7.46 – 7.37 (m, 2H), 7.38 – 7.30 (m, 4H), 7.05 (d, *J* = 3.5 Hz, 1H), 6.99 (dd, *J* = 5.0, 3.6 Hz, 1H), 5.54 (d, *J* = 6.2 Hz, 1H), 3.94 (td, *J* = 7.8, 6.2 Hz, 1H), 3.08 (dd, *J* = 18.0, 8.1 Hz, 1H), 2.66 (dd, *J* = 18.0, 7.5 Hz, 1H); **<sup>13</sup>C NMR** (126 MHz, CDCl<sub>3</sub>, ppm): δ 173.51, 139.84, 133.74, 131.38, 129.61, 128.88, 127.24, 126.62, 126.54, 81.82, 49.94, 35.68; **IR** (neat): 2922, 1788, 1476, 1439, 1213, 1135, 983, 748, 705, 692 cm<sup>-1</sup>; **HRMS** (ESI) *m/z* calcd. for C<sub>14</sub>H<sub>12</sub>NaO<sub>2</sub>S<sub>2</sub> (M+Na)<sup>+</sup>: 299.0176, found: 299.0173; separation of enantiomers by HPLC, Chiralcel® Column OD-H, 30 °C, *n*-hexane: *i*-PrOH = 93:7, 1 mL/min, major retention time: 27.21 min, minor retention time: 34.88 min, er = 95:5;  $[\alpha]_D^{20} = -35.5$  (*c* = 0.4, CHCl<sub>3</sub>).

(4*R*, 5*S*)-5-(furan-3-yl)-4-(phenylthio)dihydrofuran-2(3H)-one (**3p**):

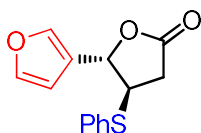

General procedure A was followed using (*E*)-4-(furan-3-yl)but-3-enoic acid (**1p**, 15.2 mg, 0.1 mmol, 1.0 equiv) and 2-(phenylthio)benzo[*d*]isothiazol-3(2H)-one 1,1-dioxide (**2a**, 35 mg, 0.12 mmol, 1.2 equiv) stirred for 24 h at -5 °C. The crude mixture was purified by silica gel flash chromatography (1:5 EtOAc:petroleum ether) to afford product **3p** as a white solid (20.0 mg, 77% yield),  $R_f = 0.5$  (1:5 EtOAc:petroleum ether). **Mp**: 85.8 ~87.2 °C. **<sup>1</sup>H NMR** (400 MHz, CDCl<sub>3</sub>, ppm): δ 7.50 – 7.38 (m, 4H), 7.39 – 7.29 (m, 3H), 6.34 (d, *J* = 0.8 Hz, 1H), 5.29 (d, *J* = 6.3 Hz, 1H), 3.81 (td, *J* = 7.9, 6.4 Hz, 1H), 3.02 (dd, *J* = 17.9, 8.2 Hz, 1H), 2.64 (dd, *J* = 17.9, 7.6 Hz, 1H); **<sup>13</sup>C NMR** (101 MHz, CDCl<sub>3</sub>, ppm): δ 173.95, 144.30, 140.28, 133.70, 131.55,

129.61, 128.88, 122.74, 108.08, 79.33, 48.58, 35.69; **IR** (neat): 2963, 1786, 1261, 1162, 1092, 1024, 956, 875, 801, 747, 692, 601  $\text{cm}^{-1}$ ; **HRMS** (ESI)  $m/z$  calcd. for  $\text{C}_{14}\text{H}_{12}\text{NaO}_3\text{S}$  ( $\text{M}+\text{Na}$ )<sup>+</sup>: 283.0405, found: 283.0405; separation of enantiomers by HPLC, Chiralcel® Column OD-H, 30 °C, n-hexane: *i*-PrOH = 85:15, 1 mL/min, major retention time: 13.54 min, minor retention time: 18.69 min, er = 93.5:6.5;  $[\alpha]_{\text{D}}^{20} = -19.4$  ( $c = 1.0$ ,  $\text{CHCl}_3$ ).

(4*R*, 5*S*)-5-benzyl-4-(phenylthio)dihydrofuran-2(3*H*)-one (**3q**):

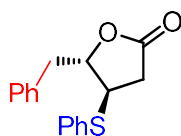

General procedure A was followed using (*E*)-5-phenylpent-3-enoic acid (**1q**, 17.6 mg, 0.1 mmol, 1.0 equiv) and 2-(phenylthio)benzo[*d*]isothiazol-3(2*H*)-one 1,1-dioxide (**2a**, 35 mg, 0.12 mmol, 1.2 equiv) stirred for 24 h at room temperature. The crude mixture was purified by silica gel flash chromatography (1:5 EtOAc:petroleum ether) to afford product **3q** as a white solid (28.0 mg, 99% yield),  $R_f = 0.5$  (1:5 EtOAc:petroleum ether). **Mp**: 82.0 ~83.1 °C. **<sup>1</sup>H NMR** (500 MHz,  $\text{CDCl}_3$ , ppm):  $\delta$  7.43 – 7.22 (m, 8H), 7.19 – 7.05 (m, 2H), 4.59 (dd,  $J = 11.0, 6.0$  Hz, 1H), 3.60 (ddd,  $J = 8.3, 7.1, 6.0$  Hz, 1H), 3.06 (dd,  $J = 14.5, 4.9$  Hz, 1H), 2.93 (dd,  $J = 14.5, 6.2$  Hz, 1H), 2.71 (dd,  $J = 18.0, 8.4$  Hz, 1H), 2.48 (dd,  $J = 18.0, 7.1$  Hz, 1H); **<sup>13</sup>C NMR** (126 MHz,  $\text{CDCl}_3$ , ppm):  $\delta$  174.28, 135.32, 133.52, 131.82, 129.76, 129.61, 128.86, 128.70, 127.31, 84.93, 45.31, 39.52, 35.7; **IR** (neat): 2960, 2924, 1800, 1482, 1261, 1174, 1033, 1003, 802, 734, 700, 691  $\text{cm}^{-1}$ ; **HRMS** (ESI)  $m/z$  calcd. for  $\text{C}_{17}\text{H}_{16}\text{NaO}_2\text{S}$  ( $\text{M}+\text{Na}$ )<sup>+</sup>: 307.0769, found: 307.0766; separation of enantiomers by HPLC, Chiralcel® Column OJ-H, 30 °C, n-hexane: *i*-PrOH = 88:12, 1 mL/min, minor retention time: 32.95 min, major retention time: 39.47 min, er = 5:95;  $[\alpha]_{\text{D}}^{20} = -29.4$  ( $c = 1.0$ ,  $\text{CHCl}_3$ ).

(4*R*, 5*S*)-5-hexyl-4-(phenylthio)dihydrofuran-2(3*H*)-one (**3r**):

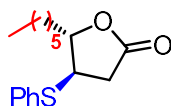

General procedure A was followed using (*E*)-dec-3-enoic acid (**1r**, 17.0 mg, 0.1 mmol, 1.0 equiv) and 2-(phenylthio)benzo[*d*]isothiazol-3(2*H*)-one 1,1-dioxide (**2a**, 35 mg, 0.12 mmol, 1.2

equiv) stirred for 24 h at 0 °C. The crude mixture was purified by silica gel flash chromatography (1:1 EtOAc:petroleum ether) to afford product **3r** as a yellow oil (23.0 mg, 83% yield),  $R_f = 0.5$  (1:1 EtOAc:petroleum ether). **<sup>1</sup>H NMR** (500 MHz, CDCl<sub>3</sub>, ppm): δ 7.46 (dd, J = 5.6, 2.0 Hz, 2H), 7.42 – 7.31 (m, 3H), 4.35 (ddd, J = 7.9, 6.2, 3.0 Hz, 1H), 3.57 (td, J = 8.1, 1.7 Hz, 1H), 2.95 (ddd, J = 18.0, 8.3, 1.7 Hz, 1H), 2.58 (ddd, J = 18.0, 7.6, 1.8 Hz, 1H), 1.83 – 1.68 (m, 1H), 1.69 – 1.56 (m, 1H), 1.52 – 1.35 (m, 2H), 1.34 – 1.19 (m, 5H), 0.90 (dd, J = 6.9, 5.2 Hz, 4H); **<sup>13</sup>C NMR** (126 MHz, CDCl<sub>3</sub>, ppm): δ 174.50, 133.53, 132.10, 129.56, 128.68, 85.17, 46.82, 36.16, 34.17, 31.44, 25.13, 22.54, 14.07; **IR** (neat): 2959, 2929, 2858, 1783, 1439, 1261, 1773, 1094, 1024, 802, 748, 692 cm<sup>-1</sup>; **HRMS** (ESI)  $m/z$  calcd. for C<sub>16</sub>H<sub>23</sub>O<sub>2</sub>S (M+H)<sup>+</sup>: 279.1438, found: 279.1423; separation of enantiomers by HPLC, Chiralcel® Column OD-H, 30 °C, n-hexane: *i*-PrOH = 88:12, 1 mL/min, major retention time: 10.25 min, minor retention time: 11.87 min, er = 97:3;  $[\alpha]_D^{20} = -49.8$  (c = 1.0, CHCl<sub>3</sub>).

(4*R*, 5*S*)-4-(argiothio)-5-phenyldihydrofuran-2(3H)-one (**3s**):

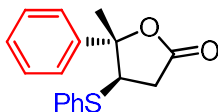

General procedure A was followed using (*E*)-4-phenylpent-3-enoic acid (**1s**, 17.6 mg, 0.1 mmol, 1.0 equiv) and 2-(phenylthio)benzo[*d*]isothiazol-3(2H)-one 1,1-dioxide (**2a**, 35 mg, 0.12 mmol, 1.2 equiv) using (R)-CPA (Cas: 39648-67-4) as the acid under CDCl<sub>3</sub> stirred for 20 h at -20 °C. The crude mixture was purified by silica gel flash chromatography (1:20 EtOAc:petroleum ether) to afford product **3s** as a white solid (26.5 mg, 93% yield),  $R_f = 0.4$  (8:1 EtOAc:petroleum ether). **Mp**: 145.7 ~147.8 °C. **<sup>1</sup>H NMR** (400 MHz, CDCl<sub>3</sub>, ppm): δ 7.54 – 7.41 (m, 2H), 7.42 – 7.17 (m, 8H), 4.04 (t, J = 7.5 Hz, 1H), 2.90 (dd, J = 17.8, 7.8 Hz, 1H), 2.73 (dd, J = 17.9, 7.2 Hz, 1H), 1.83 (s, 3H); **<sup>13</sup>C NMR** (101 MHz, CDCl<sub>3</sub>, ppm): δ 173.86, 143.44, 133.31, 132.25, 129.51, 128.81, 128.22, 128.10, 124.33, 88.76, 54.13, 37.43, 24.48; **IR** (neat): 3445, 2925, 1782, 1441, 1230, 1135, 934, 766, 748, 699 cm<sup>-1</sup>; **HRMS** (ESI)  $m/z$  calcd. for C<sub>17</sub>H<sub>17</sub>O<sub>2</sub>S (M+H)<sup>+</sup>: 285.0950, found: 285.0945; separation of enantiomers by HPLC, Chiralcel® Column OD-H, 30 °C, n-hexane: *i*-PrOH = 90:10, 1 mL/min, major retention time:

12.60 min, minor retention time: 14.77 min, er = 88.5:11.5;  $[\alpha]_D^{20} = -14.0$  (c = 1.0, CHCl<sub>3</sub>).

(4*R*, 5*R*)-4-(2-ethylbenzyl)-5-phenyldihydrofuran-2(3*H*)-one (**3t**):

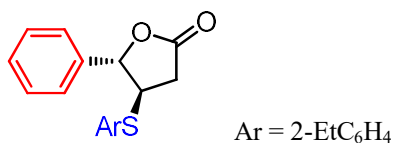

General procedure A was followed using (*E*)-4-phenylbut-3-enoic acid (**1t**, 16.2 mg, 0.1 mmol, 1.0 equiv) and 2-(phenylthio)benzo[*d*]isothiazol-3(2*H*)-one 1,1-dioxide (**2a**, 35 mg, 0.12 mmol, 1.2 equiv) stirred for 24 h at -5 °C. The crude mixture was purified by silica gel flash chromatography (1:8 EtOAc:petroleum ether) to afford product **3t** as a colorless oil (23.0 mg, 77% yield),  $R_f = 0.7$  (5:1 EtOAc:petroleum ether). **<sup>1</sup>H NMR** (400 MHz, CDCl<sub>3</sub>, ppm): δ 7.44 – 7.32 (m, 4H), 7.31 – 7.22 (m, 4H), 7.21 – 7.12 (m, 1H), 5.37 (d, J = 5.2 Hz, 1H), 3.84 (dt, J = 8.0, 6.0 Hz, 1H), 3.06 (dd, J = 18.0, 8.0 Hz, 1H), 2.86 – 2.73 (m, 2H), 2.66 (dd, J = 18.0, 6.2 Hz, 1H), 1.21 (t, J = 7.5 Hz, 3H); **<sup>13</sup>C NMR** (126 MHz, CDCl<sub>3</sub>, ppm): δ 174.68, 146.77, 137.65, 133.52, 131.15, 129.47, 128.96, 128.87, 126.92, 125.44, 85.13, 49.97, 35.63, 27.40, 15.41; **IR** (neat): 2965, 1788, 1469, 1164, 1026, 1002, 755, 699 cm<sup>-1</sup>; **HRMS** (ESI) *m/z* calcd. for C<sub>18</sub>H<sub>18</sub>NaO<sub>2</sub>S (M+Na)<sup>+</sup>: 321.0925, found: 321.0923; separation of enantiomers by HPLC, Chiralcel® Column OD-H, 30 °C, n-hexane: *i*-PrOH = 85:15, 1 mL/min, major retention time: 10.23 min, minor retention time: 16.73 min, er = 97:3;  $[\alpha]_D^{20} = -32.5$  (c = 0.4, CHCl<sub>3</sub>).

5-*endo* cyclization of **1a** for the formation of **3a** on a gram-scale:

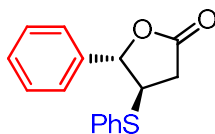

A dried round bottom flask was charged with (*E*)-4-phenylbut-3-enoic acid (**1a**, 1.00 g, 6.17 mmol, 1.0 equiv) and 2-(phenylthio)benzo[*d*]isothiazol-3(2*H*)-one 1,1-dioxide (**2a**, 2.16 g, 7.40 mmol, 1.2 equiv) stirred for 24 h at -5 °C. The crude mixture was purified by silica gel flash chromatography (1:20 EtOAc:petroleum ether) to afford product **3a** as a colorless oil (1.53 g, 92% yield),  $R_f = 0.6$  (1:5 EtOAc:petroleum ether). Separation of enantiomers by HPLC, Chiralcel® Column OD-H, 30 °C, n-hexane: *i*-PrOH = 90:10, 1 mL/min, major retention time:

16.37 min, minor retention time: 20.38 min, er = 94.5:5.5.

(4*S*, 5*S*)-5-(benzo[d][1,3]dioxol-5-yl)-4-methyldihydrofuran-2(3*H*)-one (**8**):

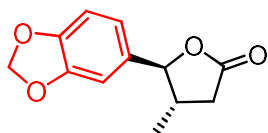

Procedures for the synthesis of **7** according to the literature procedure.<sup>11</sup> A solution of (4*S*,5*R*)-5-(benzo[d][1,3]dioxol-5-yl)-4-(phenylthio)dihydrofuran-2(3*H*)-one (*ent*-**3m**, 104.0 mg, 0.33 mmol, 1.0 equiv) and MeOH (6.9 mL), H<sub>2</sub>O (2.7 mL) stirred at room temperature. Sodium periodate (77.8 mg, 0.36 mmol, 1.1 equiv) was added as a solid, resulting in a heterogeneous solution. The mixture was stirred at room temperature for 24 h. The reaction was quenched by water (10 mL). The aqueous layer was extracted with DCM (2 × 30 mL). The organic layers were combined, washed with brine (15 mL), dried over Na<sub>2</sub>SO<sub>4</sub>, filtered, concentration and carry out the next step without purification.

In a dry tube, the solution of sulfoxide intermediate and toluene (2 mL) was refluxed at 115 °C for 3 h. After the reaction was complete (TLC), the flask was removed from the oil bath and allowed to cool to rt. The solution was concentrated by rotary evaporation. Purification by silica gel flash column chromatography (5:1 EtOAc:petroleum ether) afforded 49.5 mg (73%) of **7** as a light brown solid. *R*<sub>f</sub> = 0.3 (5:1 EtOAc:petroleum ether).

Under anhydrous anaerobic conditions, cuprous iodide (140 mg, 0.74 mmol, 10.0 equiv) was dissolved in anhydrous ether, methyllithium (1.6 M solution in diethyl ether, 0.92 mL, 1.47 mmol, 20.0 equiv) was added in the mixture at -38 °C, then stirred at 0 °C for 45 min. After this, the mixture was cooled to -78 °C stirred for 15 min, **7** (15 mg, 0.074 mmol, 1.0 equiv) was dissolved in ether (4 mL) and added dropwise to the reaction system at -78 °C. The reaction system stirred for 4 h at -78 °C. The reaction was quenched by saturated ammonium chloride solution (15 mL). The aqueous layer was extracted with DCM (2 × 20 mL). The organic layers were combined, washed with brine (15 mL), dried over Na<sub>2</sub>SO<sub>4</sub>, filtered, concentration and purification by silica gel flash column chromatography (8:1 EtOAc:petroleum ether) afforded 12.6 mg (78%) of **8** as a fuchsia liquid. *R*<sub>f</sub> = 0.6 (2:1 EtOAc:petroleum ether). <sup>1</sup>H NMR (400

MHz, CDCl<sub>3</sub>, ppm):  $\delta$  6.81 (m, 3H), 5.98 (s, 2H), 4.84 (d, J = 8.6 Hz, 1H), 2.78 (dd, J = 16.8, 7.5 Hz, 1H), 2.55 – 2.40 (m, 1H), 2.32 (dd, J = 16.8, 10.8 Hz, 1H), 1.16 (d, J = 6.5 Hz, 3H); <sup>13</sup>C NMR (101 MHz, CDCl<sub>3</sub>, ppm):  $\delta$  176.06, 148.28, 148.18, 131.64, 120.18, 108.38, 106.52, 101.48, 88.37, 39.96, 37.48, 16.45; IR (neat): 3445, 2962, 2925, 1778, 1636, 1260, 1097, 1038, 803 cm<sup>-1</sup>; HRMS (ESI) m/z calcd. for C<sub>12</sub>H<sub>12</sub>NaO<sub>4</sub> (M+Na)<sup>+</sup>: 243.0633, found: 243.0630 ; separation of enantiomers by HPLC, Chiralcel® Column OD-H, 30 °C, n-hexane: *i*-PrOH = 70:30, 1 mL/min, minor retention time: 8.17 min, major retention time: 8.58 min, er = 1.5:98.5;  $[\alpha]_D^{20} = +6.0$  (c = 0.2, CHCl<sub>3</sub>).

### 3.2 General procedure for the enantioselective 6-*exo* thiolactonization

#### (procedure B):

In a dry tube, unsaturated carboxylic acids **5** (0.1 mmol, 1.0 equiv) and sulfenylating agent **2b** (0.12 mmol, 1.2 equiv), (*S*)-Cat. **4a** (0.1 mmol, 1.0 equiv) were added in DCM (1.0 mL) under argon atmosphere. After stirred for 5 min at corresponding temperature, ethanesulfonic acid (0.1 mmol, 1.0 equiv) were added in one portion. The resulting mixture was stirred for another 36 h to 72 h at corresponding temperature. After the reaction was complete (monitored by TLC), the solvent was concentrated under reduced pressure, and the resulting residue was purified by flash column chromatography on silica gel (petroleum ether/EtOAc) to give the corresponding sulfenylated lactones.

The synthesis of 6-*exo* racemic sample was followed using unsaturated carboxylic acids **5** (0.1 mmol, 1.0 equiv) and sulfenylating agent **2b** (0.12 mmol, 1.2 equiv), racemic-Cat. **4a** (0.01 mmol, 0.1 equiv) and ethanesulfonic acid (0.1 mmol, 1.0 equiv) were added in DCM (1.0 mL) under argon atmosphere at room temperature for overnight.

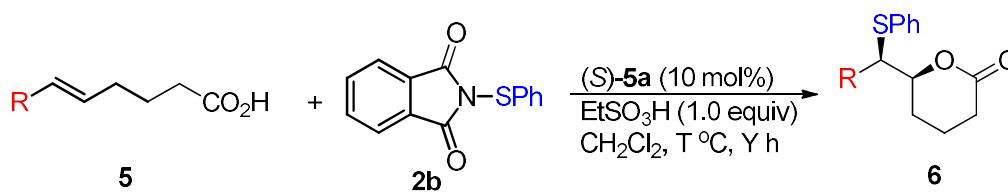

(*S*)-6-((*R*)-phenyl(phenylthio)methyl)tetrahydro-2H-pyran-2-one (**6a**)

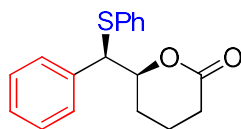

General procedure B was followed using (*E*)-6-phenylhex-5-enoic acid (**5a**, 19.0 mg (*E*:*Z* = 9:1), 0.1 mmol, 1.0 equiv) and 2-(phenylthio)isoindoline-1,3-dione (**2b**, 30.6 mg, 0.12 mmol, 1.2 equiv) stirred for 36 h at -10 °C. The crude mixture was purified by silica gel flash chromatography (1:5 EtOAc:petroleum ether) to afford product **6a** as a white solid (25.0 mg, 84% yield),  $R_f = 0.2$  (5:1 EtOAc:petroleum ether). **Mp**: 125.5 ~127.6 °C. **<sup>1</sup>H NMR** (500 MHz, CDCl<sub>3</sub>, ppm): δ 7.39 – 7.35 (m, 2H), 7.34 – 7.29 (m, 4H), 7.27 – 7.24 (m, 1H), 7.23 – 7.16 (m, 3H), 4.75 – 4.65 (m, 1H), 4.33 (d, *J* = 4.8 Hz, 1H), 2.56 (m, 1H), 2.44 – 2.25 (m, 1H), 2.10 – 1.96 (m, 1H), 1.93 – 1.83 (m, 1H), 1.77 (m, 1H), 1.60 – 1.51 (m, 1H); **<sup>13</sup>C NMR** (126 MHz, CDCl<sub>3</sub>, ppm): δ 170.86, 137.87, 134.53, 132.51, 129.18, 129.04, 128.61, 127.92, 127.59, 82.11, 58.54, 29.69, 25.68, 18.60; **IR** (neat): 2917, 1726, 1580, 1480, 1438, 1368, 1232, 1166, 1057, 938, 744, 703, 692, 513 cm<sup>-1</sup>; **HRMS** (ESI) *m/z* calcd. for C<sub>18</sub>H<sub>18</sub>NaO<sub>2</sub>S (M+Na)<sup>+</sup>: 321.0925, found: 321.0927; separation of enantiomers by HPLC, Chiralcel® Column AD-H, 30 °C, n-hexane: *i*-PrOH = 90:10, 1 mL/min, major retention time: 12.51 min, minor retention time: 13.94 min, er = 97.5:2.5;  $[\alpha]_D^{20} = -113.2$  (*c* = 1.0, CHCl<sub>3</sub>).

(*R*)-6-((*S*)-phenyl(phenylthio)methyl)tetrahydro-2H-pyran-2-one (*ent*-**6a**)

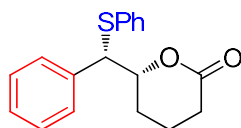

General procedure B was followed using (*E*)-6-phenylhex-5-enoic acid (**5a**, 19.0 mg (*E*:*Z* = 9:1), 0.1 mmol, 1.0 equiv) and 2-(phenylthio)isoindoline-1,3-dione (**2b**, 30.6 mg, 0.12 mmol, 1.2 equiv) stirred for 66 h at -10 °C. The crude mixture was purified by silica gel flash chromatography (1:5 EtOAc:petroleum ether) to afford product *ent*-**6a** as a white solid (24.0 mg, 80% yield),  $R_f = 0.2$  (5:1 EtOAc:petroleum ether). **Mp**: 93.8~95.4 °C. Separation of enantiomers by HPLC, Chiralcel® Column AD-H, 30 °C, n-hexane: *i*-PrOH = 90:10, 1 mL/min,

minor retention time: 12.04 min, major retention time: 13.38 min, er = 2.5:97.5;  $[\alpha]_D^{20} = +101.8$  (c = 1.0, CHCl<sub>3</sub>).

(S)-6-((R)-(4-fluorophenyl)(phenylthio)methyl)tetrahydro-2H-pyran-2-one (**6b**)

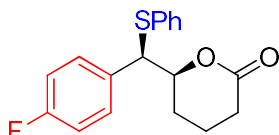

General procedure B was followed using (*E*)-6-(4-fluorophenyl)hex-5-enoic acid (**5b**, 20.8 mg, 0.1 mmol, 1.0 equiv) and 2-(phenylthio)isoindoline-1,3-dione (**2b**, 30.6 mg, 0.12 mmol, 1.2 equiv) stirred for 72 h at -10 °C. The crude mixture was purified by silica gel flash chromatography (1:4 EtOAc:petroleum ether) to afford product **6b** as a colorless oil (34.0 mg, 95% yield),  $R_f = 0.2$  (5:1 EtOAc:petroleum ether). <sup>1</sup>H NMR (400 MHz, CDCl<sub>3</sub>, ppm): δ 7.30 (m, 4H), 7.21 (dd, J = 6.5, 2.7 Hz, 3H), 7.05 – 6.85 (m, 2H), 4.66 (ddd, J = 11.3, 4.9, 3.3 Hz, 1H), 4.28 (d, J = 5.0 Hz, 1H), 2.57 (m, 1H), 2.43 – 2.26 (m, 1H), 2.03 (ddd, J = 12.4, 7.3, 3.5 Hz, 1H), 1.95 – 1.69 (m, 2H), 1.52 (dtd, J = 13.8, 11.3, 5.4 Hz, 1H); <sup>13</sup>C NMR (101 MHz, CDCl<sub>3</sub>, ppm): δ 170.75, 162.32 (d, J = 246.7 Hz), 133.97, 133.59 (d, J = 3.3 Hz), 132.77, 130.80 (d, J = 8.1 Hz), 129.10, 127.82, 115.47 (d, J = 21.5 Hz), 81.82, 57.67, 29.61, 25.91, 18.52; <sup>19</sup>F NMR (376 MHz, CDCl<sub>3</sub>): δ -114.35; IR (neat): 2956, 1737, 1604, 1508, 1439, 1233, 1159, 1053, 839, 743, 692, 529 cm<sup>-1</sup>; HRMS (ESI) m/z calcd. for C<sub>18</sub>H<sub>17</sub>FN<sub>2</sub>O<sub>2</sub>S (M+Na)<sup>+</sup>: 339.0831, found: 339.0833; separation of enantiomers by HPLC, Chiralcel® Column OD-H, 30 °C, n-hexane: *i*-PrOH = 70:30, 1 mL/min, major retention time: 7.27 min, minor retention time: 11.84 min, er = 92:8;  $[\alpha]_D^{20} = -68.42$  (c = 1.0, CHCl<sub>3</sub>).

6-exo cyclization of **5a** for the formation of *ent*-**6a** on a gram-scale:

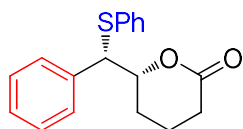

A dried round bottom flask was charged with (*E*)-6-phenylhex-5-enoic acid (**5a**, 1.141 g (*E*:*Z* = 4:1), 6.0 mmol, 1.0 equiv) and 2-(phenylthio)isoindoline-1,3-dione (**2b**, 1.838 g, 7.2 mmol, 1.2 equiv) stirred for 66 h at -10 °C. The crude mixture was purified by silica gel flash



chromatography (1:8 EtOAc:petroleum ether) to afford product *ent*-**6a** as a white solid (1.350 g, 75% yield),  $R_f = 0.2$  (5:1 EtOAc:petroleum ether), and recycling raw materials *Z*-**5a** (180 mg, 10%). Separation of enantiomers by HPLC, Chiralcel® Column AD-H, 30 °C, n-hexane: *i*-PrOH = 90:10, 1 mL/min, minor retention time: 12.28 min, major retention time: 13.58 min, er =4:96.

### Crystals **3e** and **6a**

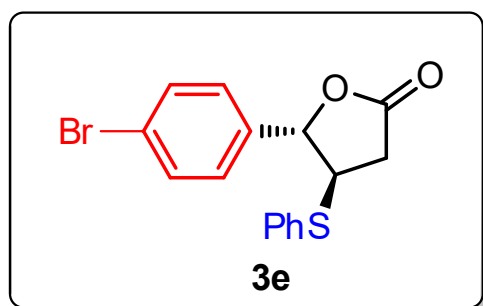

CCDC 1899806

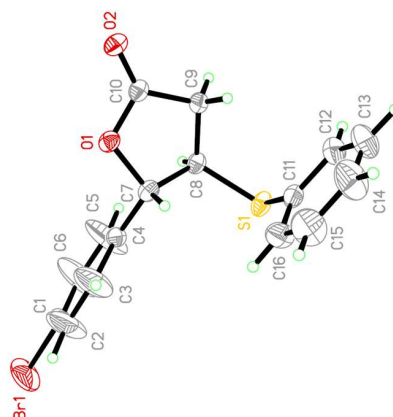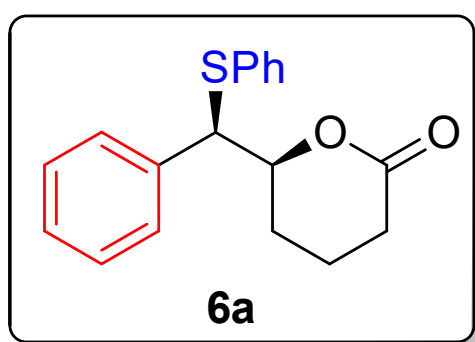

CCDC 1938651

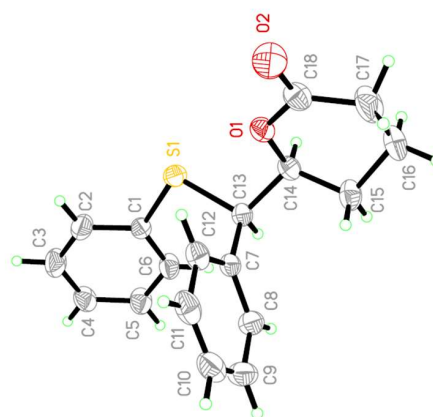

### HPLC list of products 5-endo

| Compounds                                                                                                 | Chiral column  | Eluent ratio, flow rate, retention time                                                                                | ee  |
|-----------------------------------------------------------------------------------------------------------|----------------|------------------------------------------------------------------------------------------------------------------------|-----|
| 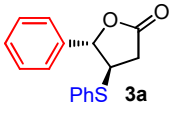<br>PhS 3a               | Chiralpak OD-H | Hexane/Isopropanol 90/10, flow rate = 1.0 mL/min, 254 nm<br>minor isomer: tr = 20.23 min; major isomer: tr = 16.04 min | 92% |
| <br>PhS<br>3a-gram-scale | Chiralpak OD-H | Hexane/Isopropanol 90/10, flow rate = 1.0 mL/min, 254 nm<br>minor isomer: tr = 20.38 min; major isomer: tr = 16.37 min | 89% |
| <br>PhS 3b               | Chiralpak OD-H | Hexane/Isopropanol 90/10, flow rate = 1.0 mL/min, 254 nm<br>minor isomer: tr = 17.74 min; major isomer: tr = 14.52 min | 91% |
| <br>PhS 3c               | Chiralpak OD-H | Hexane/Isopropanol 90/10, flow rate = 1.0 mL/min, 254 nm<br>minor isomer: tr = 30.81 min; major isomer: tr = 16.82 min | 91% |
| <br>PhS 3d             | Chiralpak OD-H | Hexane/Isopropanol 90/10, flow rate = 1.0 mL/min, 254 nm<br>minor isomer: tr = 27.29 min; major isomer: tr = 21.81 min | 90% |
| <br>PhS 3e             | Chiralpak OD-H | Hexane/Isopropanol 90/10, flow rate = 1.0 mL/min, 254 nm<br>minor isomer: tr = 31.40 min; major isomer: tr = 27.20 min | 89% |
| <br>PhS 3f             | Chiralpak OD-H | Hexane/Isopropanol 88/12, flow rate = 1.0 mL/min, 254 nm<br>minor isomer: tr = 38.99 min; major isomer: tr = 32.00 min | 89% |
| <br>PhS 3g             | Chiralpak OD-H | Hexane/Isopropanol 88/12, flow rate = 1.0 mL/min, 254 nm<br>minor isomer: tr = 27.29 min; major isomer: tr = 24.18 min | 92% |
| <br>PhS 3h             | Chiralpak OD-H | Hexane/Isopropanol 90/10, flow rate = 1.0 mL/min, 254 nm<br>minor isomer: tr = 18.43 min; major isomer: tr = 15.67 min | 90% |
| <br>PhS 3i             | Chiralpak OD-H | Hexane/Isopropanol 90/10, flow rate = 1.0 mL/min, 254 nm<br>minor isomer: tr = 22.53 min; major isomer: tr = 19.11 min | 89% |

|                                                                                     |                |                                                                                                                        |     |
|-------------------------------------------------------------------------------------|----------------|------------------------------------------------------------------------------------------------------------------------|-----|
| 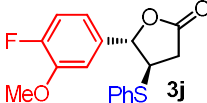   | Chiralpak OJ-H | Hexane/Isopropanol 90/10, flow rate = 1.0 mL/min, 254 nm<br>minor isomer: tr = 66.86 min; major isomer: tr = 70.33 min | 93% |
|    | Chiralpak IC   | Hexane/Isopropanol 88/12, flow rate = 1.0 mL/min, 254 nm<br>minor isomer: tr = 29.36 min; major isomer: tr = 38.76 min | 90% |
|    | Chiralpak OD-H | Hexane/Isopropanol 70/30, flow rate = 1.0 mL/min, 254 nm<br>minor isomer: tr = 22.71 min; major isomer: tr = 11.51 min | 91% |
|    | Chiralpak OD-H | Hexane/Isopropanol 90/10, flow rate = 1.0 mL/min, 254 nm<br>minor isomer: tr = 34.48 min; major isomer: tr = 29.18 min | 87% |
|   | Chiralpak OD-H | Hexane/Isopropanol 93/7, flow rate = 1.0 mL/min, 254 nm<br>minor isomer: tr = 17.43 min; major isomer: tr = 21.66 min  | 87% |
|  | Chiralpak OD-H | Hexane/Isopropanol 93/7, flow rate = 1.0 mL/min, 254 nm<br>minor isomer: tr = 34.88 min; major isomer: tr = 27.21 min  | 90% |
|  | Chiralpak OD-H | Hexane/Isopropanol 85/15, flow rate = 1.0 mL/min, 254 nm<br>minor isomer: tr = 18.69 min; major isomer: tr = 13.54 min | 87% |
|  | Chiralpak OJ-H | Hexane/Isopropanol 88/12, flow rate = 1.0 mL/min, 254 nm<br>minor isomer: tr = 32.95 min; major isomer: tr = 39.47 min | 90% |
|  | Chiralpak OD-H | Hexane/Isopropanol 88/12, flow rate = 1.0 mL/min, 254 nm<br>minor isomer: tr = 11.87 min; major isomer: tr = 10.25 min | 94% |

|                                                                                   |                |                                                                                                                        |     |
|-----------------------------------------------------------------------------------|----------------|------------------------------------------------------------------------------------------------------------------------|-----|
| 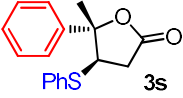 | Chiralpak OD-H | Hexane/Isopropanol 90/10, flow rate = 1.0 mL/min, 254 nm<br>minor isomer: tr = 14.77 min; major isomer: tr = 12.60 min | 77% |
|  | Chiralpak OD-H | Hexane/Isopropanol 85/15, flow rate = 1.0 mL/min, 254 nm<br>minor isomer: tr = 16.73 min; major isomer: tr = 10.23 min | 94% |
|  | Chiralpak OD-H | Hexane/Isopropanol 90/10, flow rate = 1.0 mL/min, 254 nm<br>minor isomer: tr = 17.95 min; major isomer: tr = 21.56 min | 91% |
|  | Chiralpak OD-H | Hexane/Isopropanol 70/30, flow rate = 1.0 mL/min, 254 nm<br>minor isomer: tr = 8.17 min; major isomer: tr = 8.58 min   | 97% |

### HPLC list of products 6-exo

| Compounds                                                                           | Chiral column  | Eluent ratio, flow rate, retention time                                                                                | ee  |
|-------------------------------------------------------------------------------------|----------------|------------------------------------------------------------------------------------------------------------------------|-----|
| 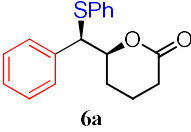 | Chiralpak AD-H | Hexane/Isopropanol 90/10, flow rate = 1.0 mL/min, 254 nm<br>minor isomer: tr = 13.94 min; major isomer: tr = 12.51 min | 95% |
|  | Chiralpak AD-H | Hexane/Isopropanol 90/10, flow rate = 1.0 mL/min, 254 nm<br>minor isomer: tr = 12.04 min; major isomer: tr = 13.38 min | 95% |
|  | Chiralpak AD-H | Hexane/Isopropanol 90/10, flow rate = 1.0 mL/min, 254 nm<br>minor isomer: tr = 12.28 min; major isomer: tr = 13.58 min | 92% |
|  | Chiralpak OD-H | Hexane/Isopropanol 70/30, flow rate = 1.0 mL/min, 254 nm<br>minor isomer: tr = 11.84 min; major isomer: tr = 7.27 min  | 84% |

## References

1. S. E. Denmark, S. Rossi, M. P. Webster and H. Wang, *J. Am. Chem. Soc.*, 2014, **136**, 13016.
2. Y. Sato, T. Mita and K. Michigami, *J. Am. Chem. Soc.*, 2017, **139**, 6094.
3. F. Kouser, V. K. Sharma, M. Rizvi, S. Sultan, N. Chalotra, V. K. Gupta, U. Utpal Nandi and B. AliShah, *Tetrahedron Letters.*, 2018, **59**, 2261.
4. X. F. Wu, J. B. Peng, F. P. Wu, L. Y. Fu and X.-X. Qi, *Org. Lett.*, 2017, **19**, 5474.
5. Y. Fu, R. Shang, M. C. Fu and W. M. Cheng, *Chem. Eur. J.*, 2017, **23**, 8818.
6. R. Beugelmans, J. Chastanet, H. Ginsburg, L. Q. Cortes and G. Roussi, *J. Org. Chem.*, 1985, **50**, 4933.
7. C. H. Tan, J. M. Wang, J. Chen and C. W. Kee, *Angew. Chem. Int. Ed.*, 2012, **51**, 2382.
8. W. B. Motherwell, S. Desrat, P. J. Gray and M. R. Penny, *Chem. Eur. J.*, 2014, **20**, 8918.
9. Y. Yamamoto, K. Tomioka, Y. Nakanishi and K. Yamada, *Tetrahedron.*, 2018, **74**, 5309.
10. G. D. Abigail, R. Tomislav, E. S. Erin and B. E. Alyssa, *ACS Catal.*, 2018, **8**, 11134.
11. S. E. Denmark and D. J. P. Kornfilt, *J. Org. Chem.*, 2017, **82**, 3192.

## Copies of HPLC :

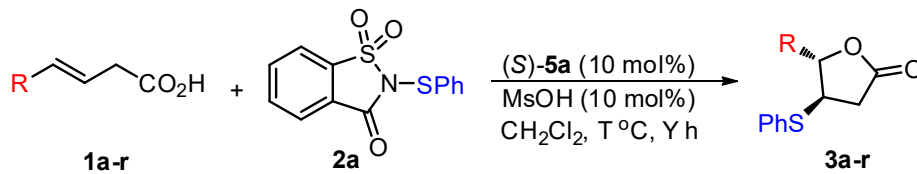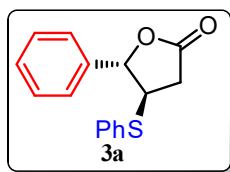

Separation of enantiomers by HPLC, Chiralcel® Column OD-H, 30 °C, n-hexane: *i*-PrOH = 90:10, 1 mL/min.

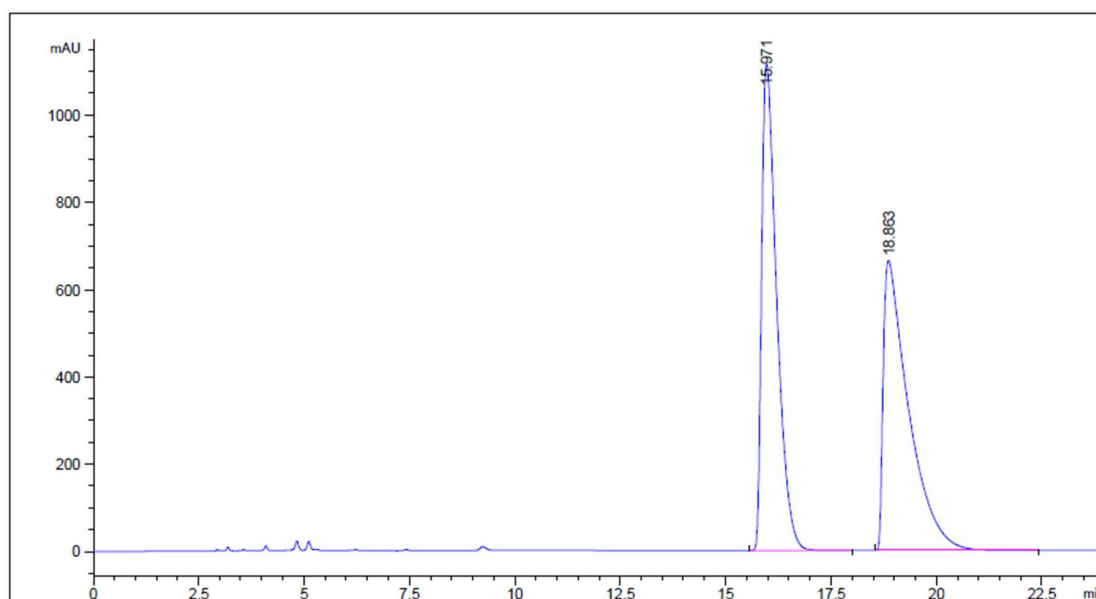

Signal 1: DAD1 B, Sig=254,4 Ref=off

| Peak # | RetTime [min] | Type | Width [min] | Area [mAU*s] | Height [mAU] | Area %  |
|--------|---------------|------|-------------|--------------|--------------|---------|
| 1      | 15.971        | BB   | 0.3740      | 2.77293e4    | 1115.50098   | 49.9959 |
| 2      | 18.863        | BB   | 0.5885      | 2.77338e4    | 665.02350    | 50.0041 |

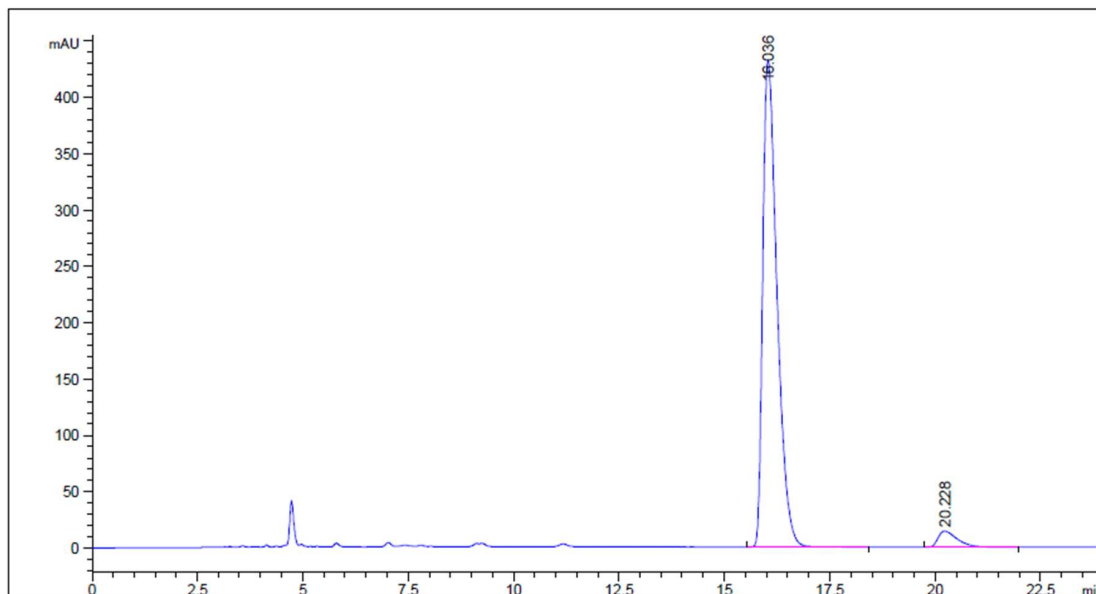

Signal 1: DAD1 B, Sig=254,4 Ref=off

| Peak # | RetTime [min] | Type | Width [min] | Area [mAU*s] | Height [mAU] | Area %  |
|--------|---------------|------|-------------|--------------|--------------|---------|
| 1      | 16.036        | BB   | 0.3597      | 1.01376e4    | 432.13904    | 95.8079 |
| 2      | 20.228        | BB   | 0.4735      | 443.57434    | 14.16008     | 4.1921  |

1 gram-scale 6-endo lactoniaton of **3a**

Separation of enantiomers by HPLC, Chiralcel® Column OD-H, 30 °C, n-hexane: *i*-PrOH = 90:10, 1 mL/min.

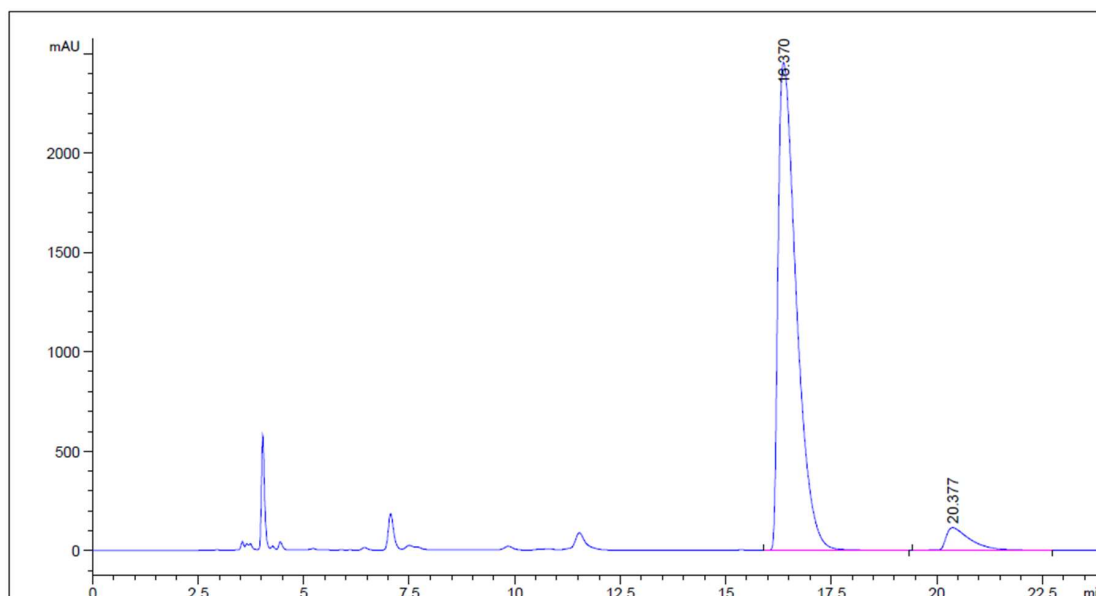

Signal 1: DAD1 B, Sig=254,4 Ref=off

| Peak # | RetTime [min] | Type | Width [min] | Area [mAU*s] | Height [mAU] | Area %  |
|--------|---------------|------|-------------|--------------|--------------|---------|
| 1      | 16.370        | BB   | 0.4582      | 7.36245e4    | 2452.57861   | 94.4120 |
| 2      | 20.377        | BB   | 0.5689      | 4357.65527   | 112.74175    | 5.5880  |

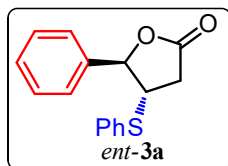

Separation of enantiomers by HPLC, Chiralcel® Column OD-H, 30 °C, n-hexane: *i*-PrOH = 90:10, 1 mL/min.

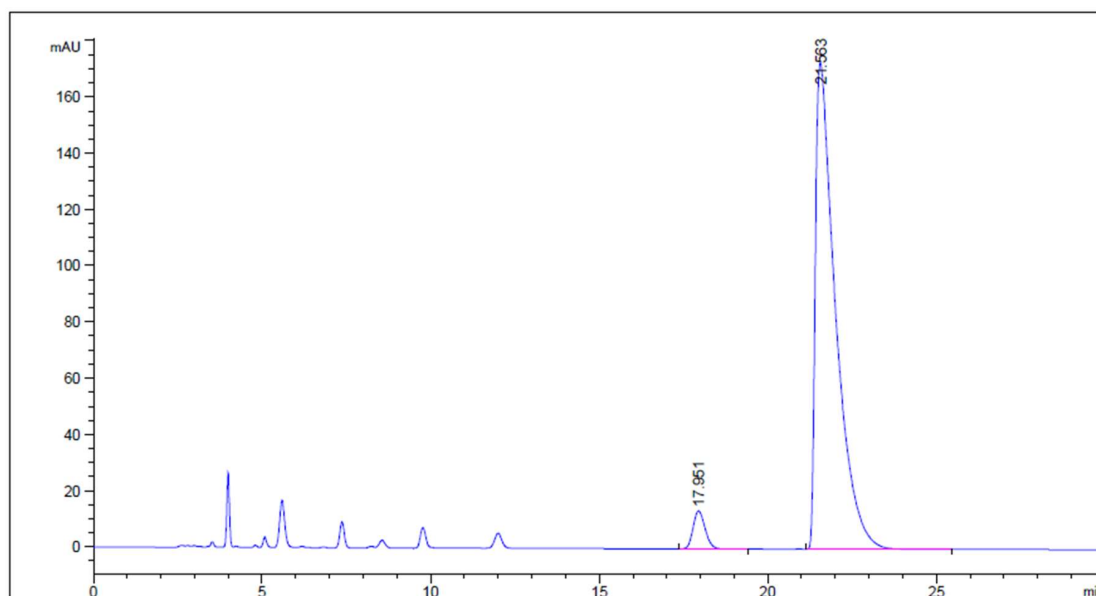

Signal 1: VWD1 A, Wavelength=254 nm

| Peak # | RetTime [min] | Type | Width [min] | Area [mAU*s] | Height [mAU] | Area %  |
|--------|---------------|------|-------------|--------------|--------------|---------|
| 1      | 17.951        | BB   | 0.3821      | 332.87674    | 13.57563     | 4.4315  |
| 2      | 21.563        | BB   | 0.6023      | 7178.75195   | 172.93964    | 95.5685 |



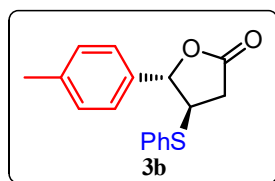

Separation of enantiomers by HPLC, Chiralcel® Column OD-H, 30 °C, n-hexane: *i*-PrOH = 90:10, 1 mL/min.

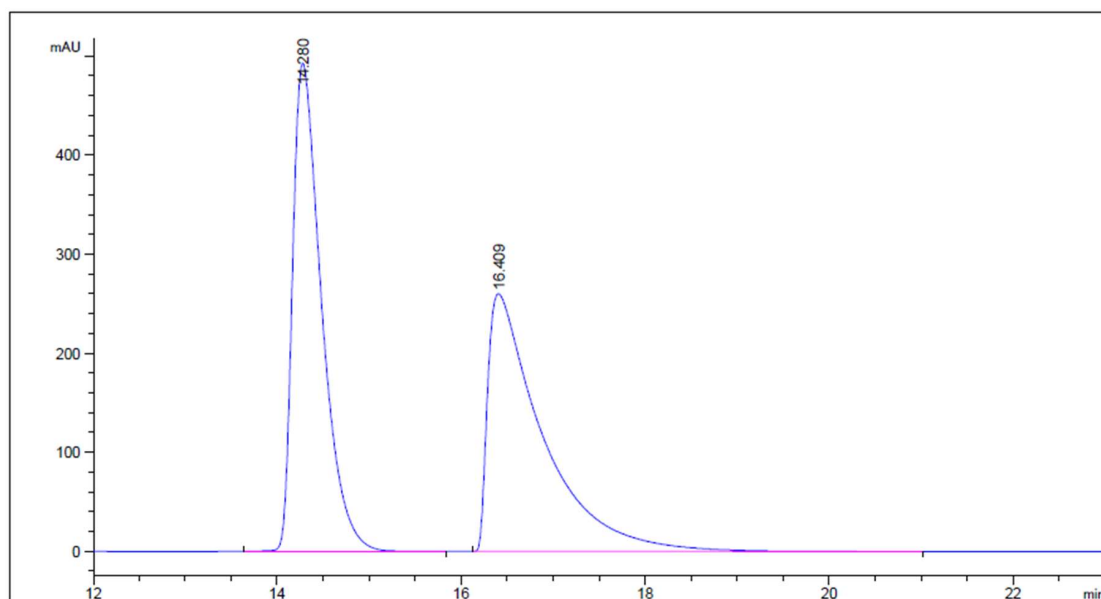

Signal 1: DAD1 B, Sig=254,4 Ref=off

| Peak # | RetTime [min] | Type | Width [min] | Area [mAU*s] | Height [mAU] | Area %  |
|--------|---------------|------|-------------|--------------|--------------|---------|
| 1      | 14.280        | BB   | 0.3307      | 1.07522e4    | 492.56180    | 49.9477 |
| 2      | 16.409        | BB   | 0.5817      | 1.07747e4    | 259.88947    | 50.0523 |

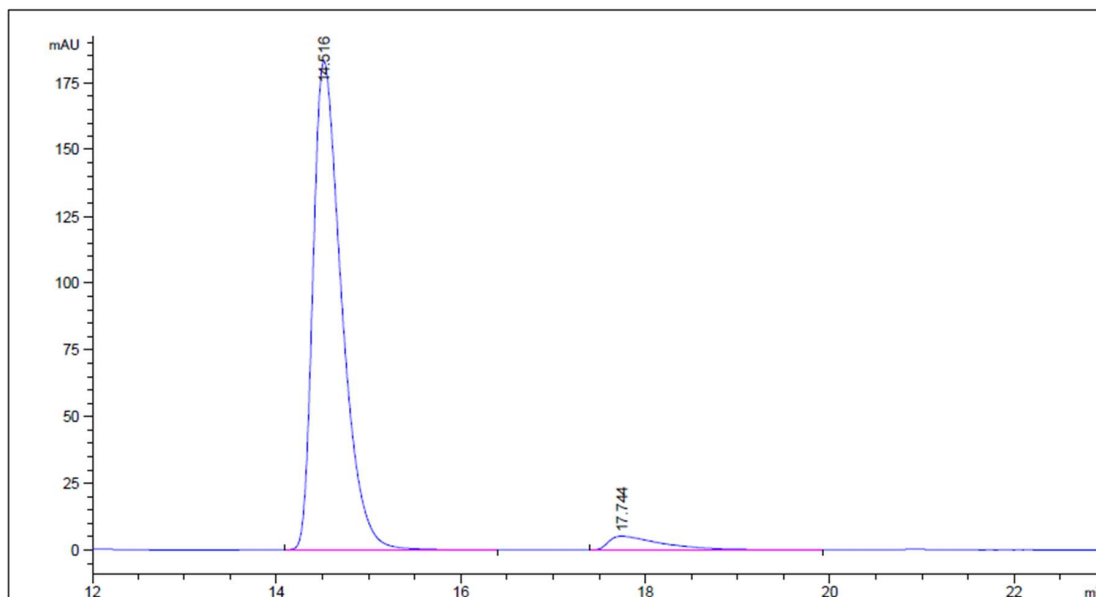

Signal 1: DAD1 B, Sig=254,4 Ref=off

| Peak # | RetTime [min] | Type | Width [min] | Area [mAU*s] | Height [mAU] | Area %  |
|--------|---------------|------|-------------|--------------|--------------|---------|
| 1      | 14.516        | BB   | 0.3289      | 3933.89844   | 182.92715    | 95.3111 |
| 2      | 17.744        | BB   | 0.5235      | 193.53072    | 5.00104      | 4.6889  |

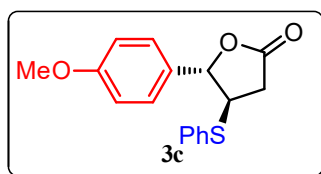

Separation of enantiomers by HPLC, Chiralcel® Column OD-H, 30 °C, n-hexane: *i*-PrOH = 90:10, 1 mL/min.

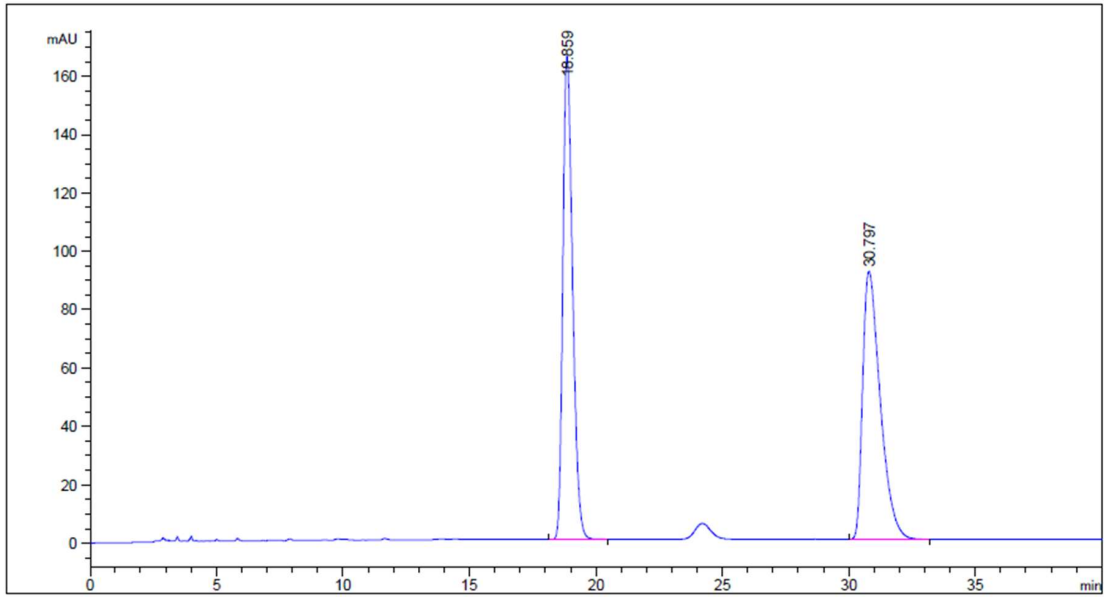

Signal 1: DAD1 B, Sig=254,4 Ref=off

| Peak # | RetTime [min] | Type | Width [min] | Area [mAU*s] | Height [mAU] | Area %  |
|--------|---------------|------|-------------|--------------|--------------|---------|
| 1      | 18.859        | BB   | 0.4128      | 4447.25830   | 165.88283    | 50.0988 |
| 2      | 30.797        | BB   | 0.7230      | 4429.71826   | 91.78625     | 49.9012 |

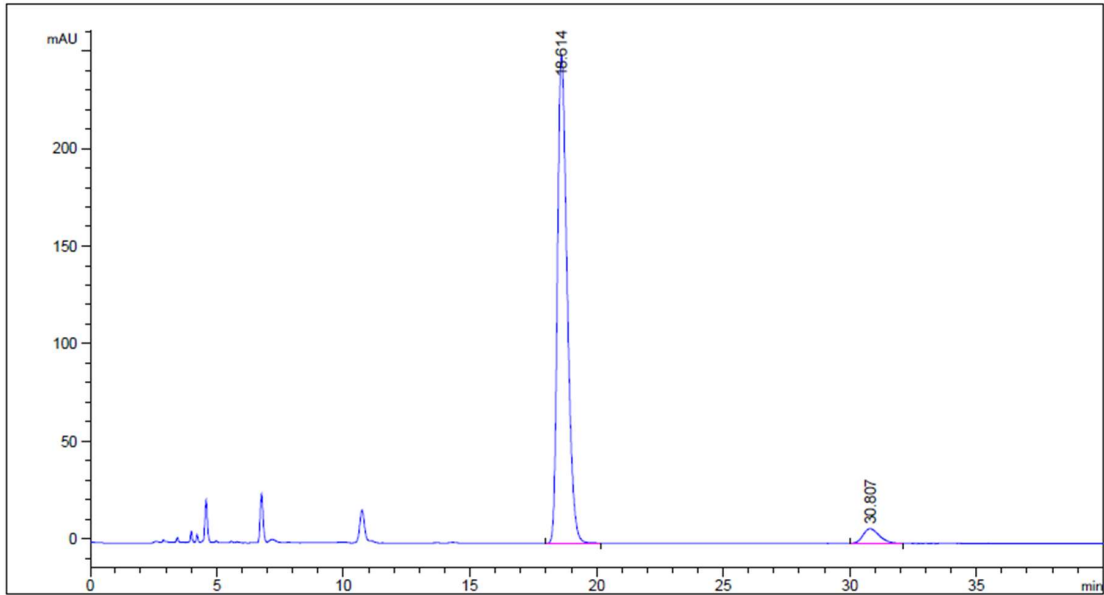

Signal 1: DAD1 B, Sig=254,4 Ref=off

| Peak # | RetTime [min] | Type | Width [min] | Area [mAU*s] | Height [mAU] | Area %  |
|--------|---------------|------|-------------|--------------|--------------|---------|
| 1      | 18.614        | BB   | 0.4104      | 6655.21191   | 250.10754    | 95.3000 |
| 2      | 30.807        | BB   | 0.5808      | 328.22467    | 7.43790      | 4.7000  |

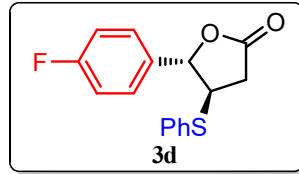

Separation of enantiomers by HPLC, Chiralcel® Column OD-H, 30 °C, n-hexane: *i*-PrOH = 90:10, 1 mL/min.

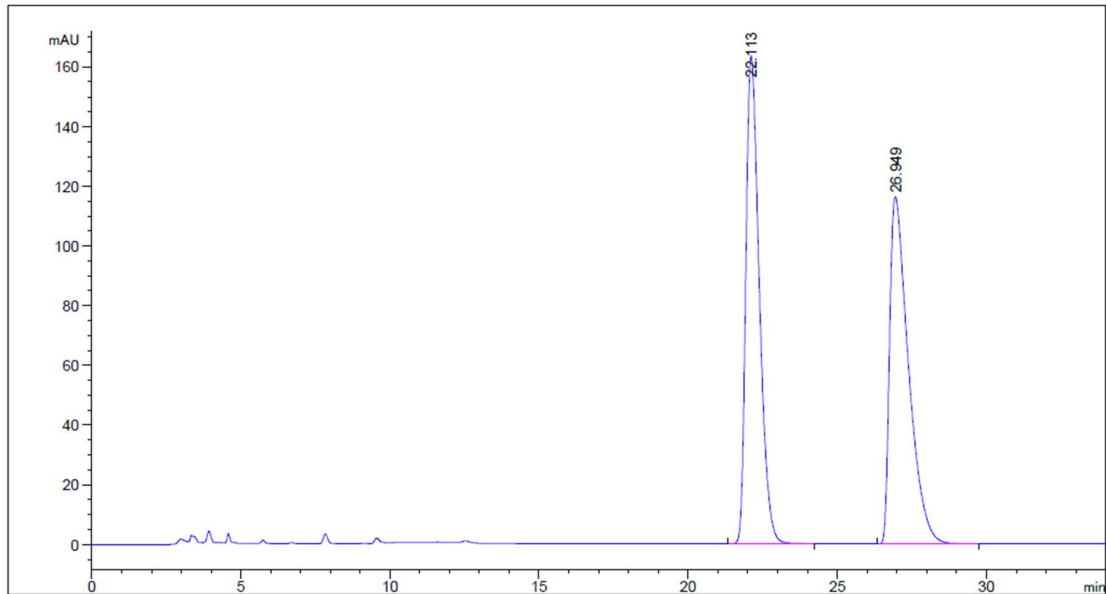

Signal 1: DAD1 B, Sig=254,4 Ref=off

| Peak # | RetTime [min] | Type | Width [min] | Area [mAU*s] | Height [mAU] | Area %  |
|--------|---------------|------|-------------|--------------|--------------|---------|
| 1      | 22.113        | BB   | 0.4784      | 5106.16113   | 163.47510    | 50.0370 |
| 2      | 26.949        | BB   | 0.6557      | 5098.60107   | 116.23823    | 49.9630 |

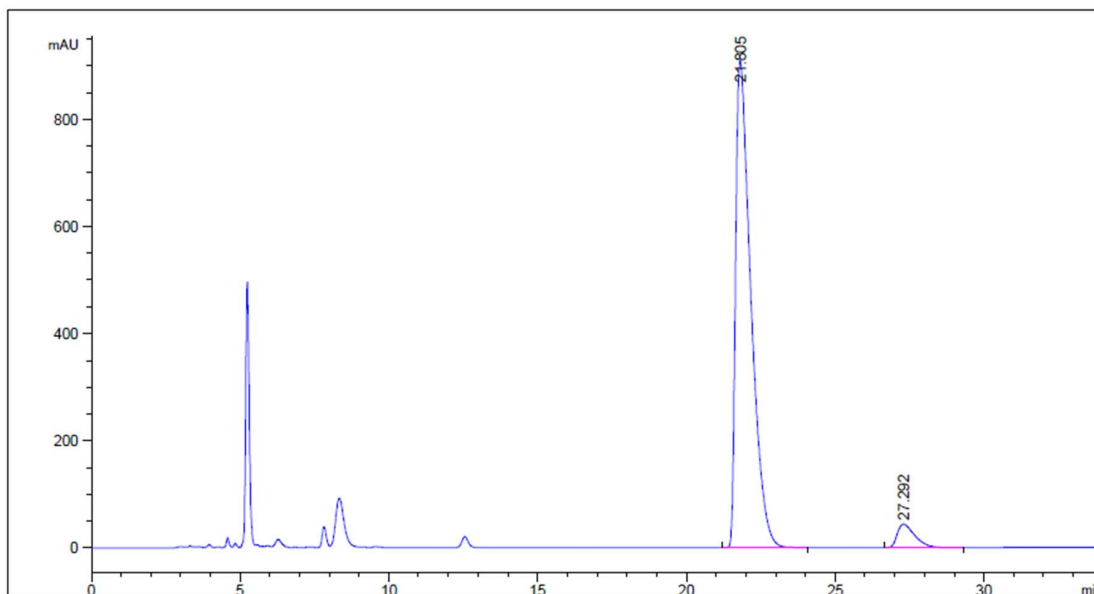

Signal 1: DAD1 B, Sig=254,4 Ref=off

| Peak # | RetTime [min] | Type | Width [min] | Area [mAU*s] | Height [mAU] | Area %  |
|--------|---------------|------|-------------|--------------|--------------|---------|
| 1      | 21.805        | BB   | 0.5333      | 3.24043e4    | 910.21326    | 94.7526 |
| 2      | 27.292        | BB   | 0.6185      | 1794.56860   | 43.75899     | 5.2474  |

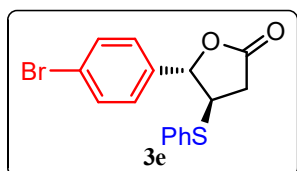

Separation of enantiomers by HPLC, Chiralcel® Column OD-H, 30 °C, n-hexane: *i*-PrOH = 90:10, 1 mL/min.

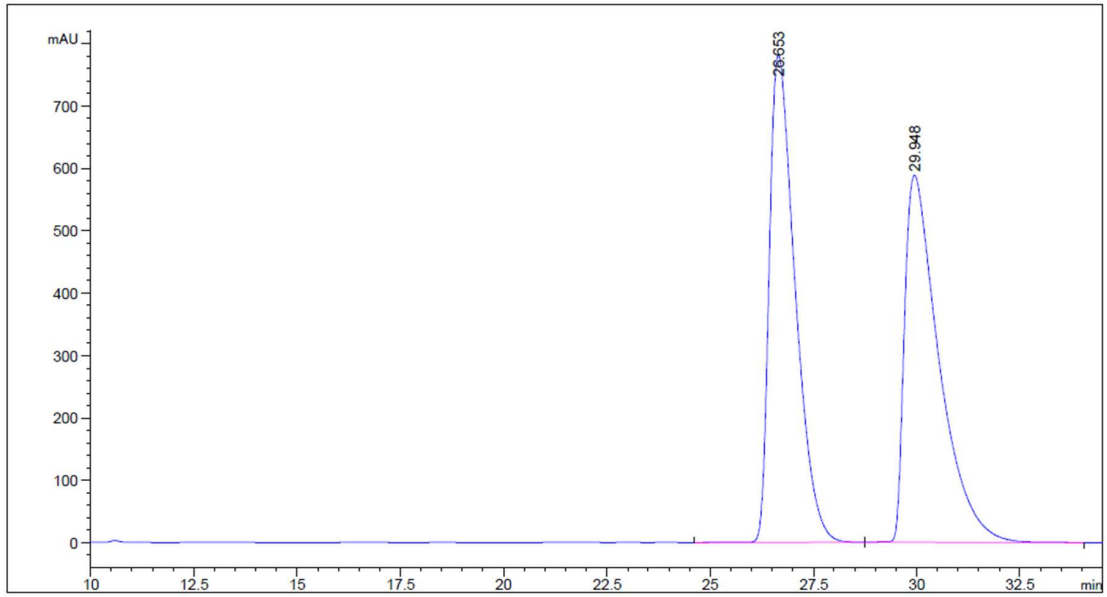

Signal 1: VWD1 B, Wavelength=230 nm

| Peak # | RetTime [min] | Type | Width [min] | Area [mAU*s] | Height [mAU] | Area %  |
|--------|---------------|------|-------------|--------------|--------------|---------|
| 1      | 26.653        | VB R | 0.6582      | 3.39251e4    | 781.93158    | 49.8886 |
| 2      | 29.948        | BB   | 0.8631      | 3.40766e4    | 588.91351    | 50.1114 |

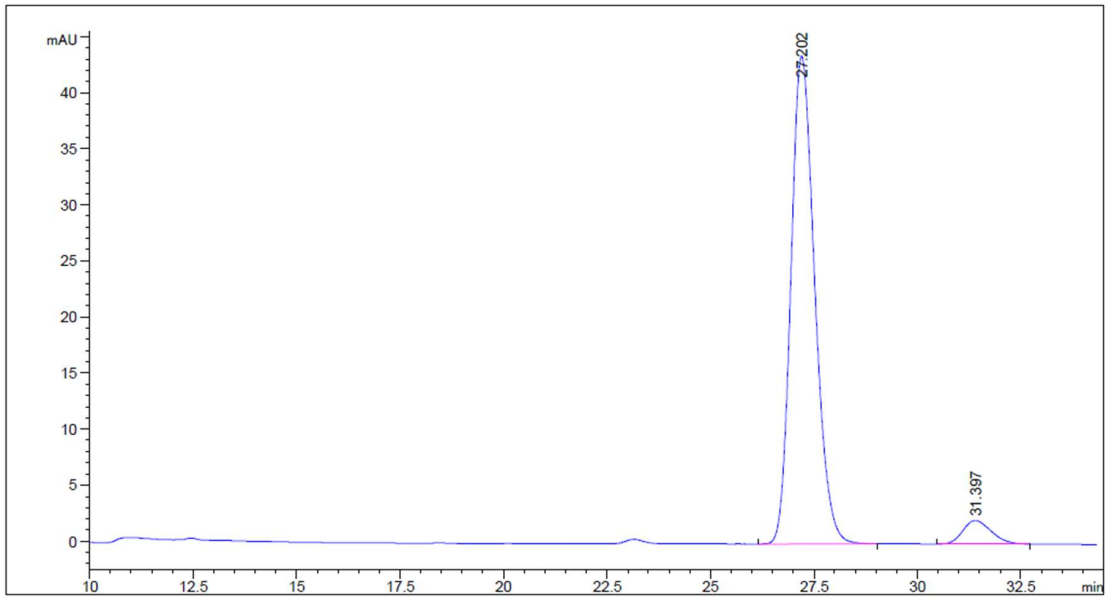

Signal 1: VWD1 B, Wavelength=230 nm

| Peak # | RetTime [min] | Type | Width [min] | Area [mAU*s] | Height [mAU] | Area %  |
|--------|---------------|------|-------------|--------------|--------------|---------|
| 1      | 27.202        | BB   | 0.6172      | 1734.94409   | 43.51159     | 94.5100 |
| 2      | 31.397        | BB   | 0.7287      | 100.78227    | 2.11197      | 5.4900  |

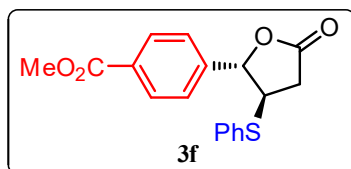

Separation of enantiomers by HPLC, Chiralcel® Column OD-H, 30 °C, n-hexane: *i*-PrOH = 88:12, 1 mL/min.

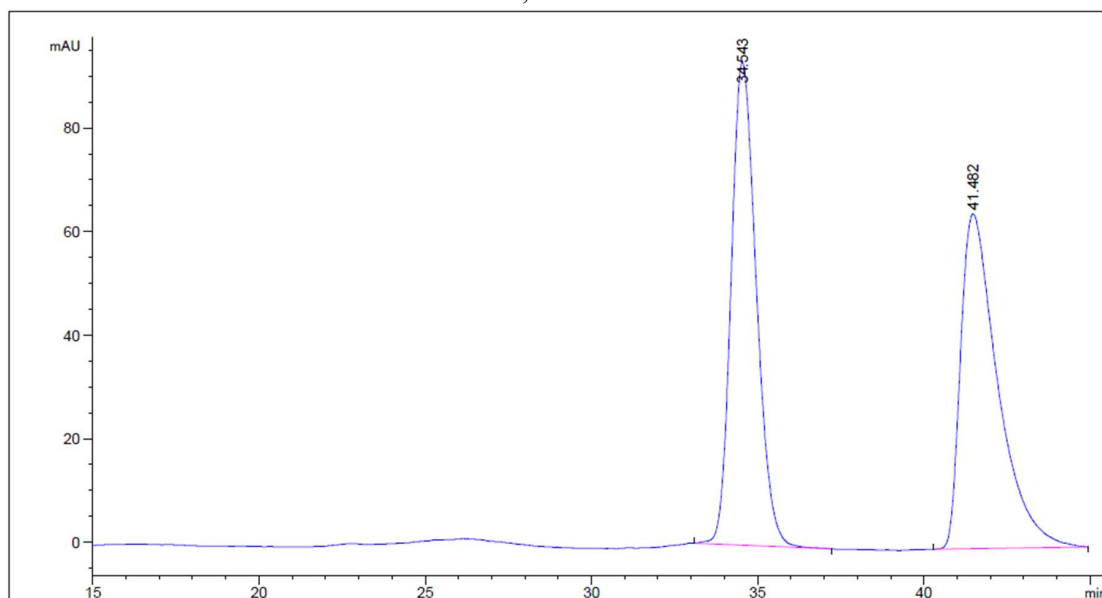

Signal 1: DAD1 C, Sig=210,4 Ref=off

| Peak # | RetTime [min] | Type | Width [min] | Area [mAU*s] | Height [mAU] | Area %  |
|--------|---------------|------|-------------|--------------|--------------|---------|
| 1      | 34.543        | BB   | 0.8110      | 4906.02002   | 93.36728     | 49.4981 |
| 2      | 41.482        | BBA  | 1.1028      | 5005.51709   | 64.68230     | 50.5019 |

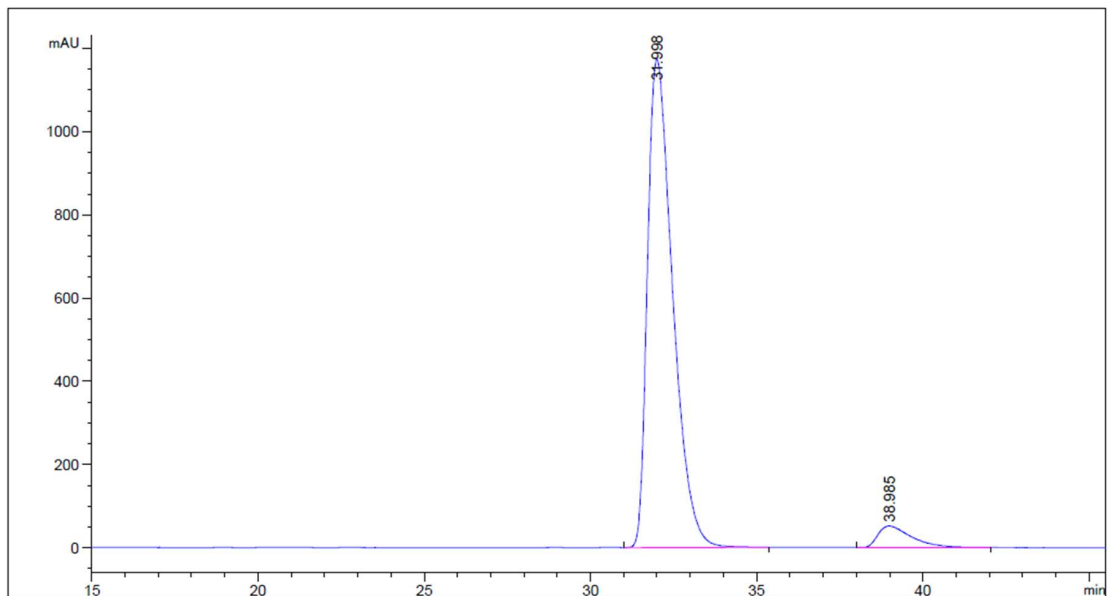

Signal 1: DAD1 C, Sig=210,4 Ref=off

| Peak # | RetTime [min] | Type | Width [min] | Area [mAU*s] | Height [mAU] | Area %  |
|--------|---------------|------|-------------|--------------|--------------|---------|
| 1      | 31.998        | BB   | 0.8011      | 6.16932e4    | 1173.95630   | 94.5029 |
| 2      | 38.985        | BB   | 1.0014      | 3588.60474   | 51.47446     | 5.4971  |

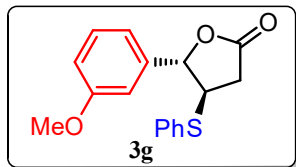

Separation of enantiomers by HPLC, Chiralcel® Column OD-H, 30 °C, n-hexane: *i*-PrOH = 88:12, 1 mL/min.



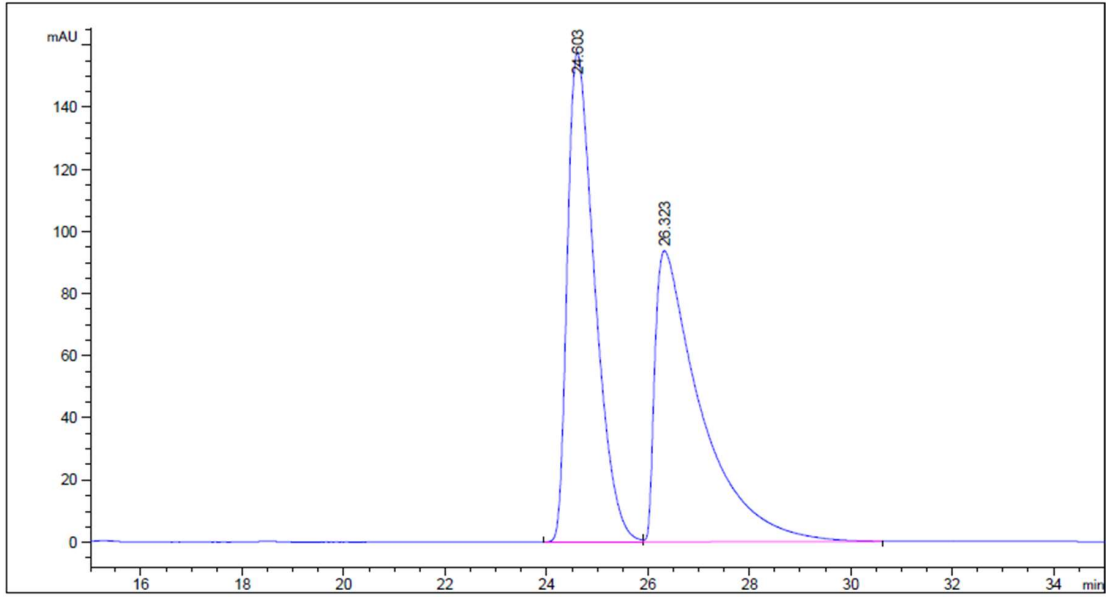

Signal 1: DAD1 B, Sig=254,4 Ref=off

| Peak # | RetTime [min] | Type | Width [min] | Area [mAU*s] | Height [mAU] | Area %  |
|--------|---------------|------|-------------|--------------|--------------|---------|
| 1      | 24.603        | BV   | 0.5760      | 5906.83496   | 157.32224    | 50.1124 |
| 2      | 26.323        | VB   | 0.8747      | 5880.33008   | 93.63766     | 49.8876 |

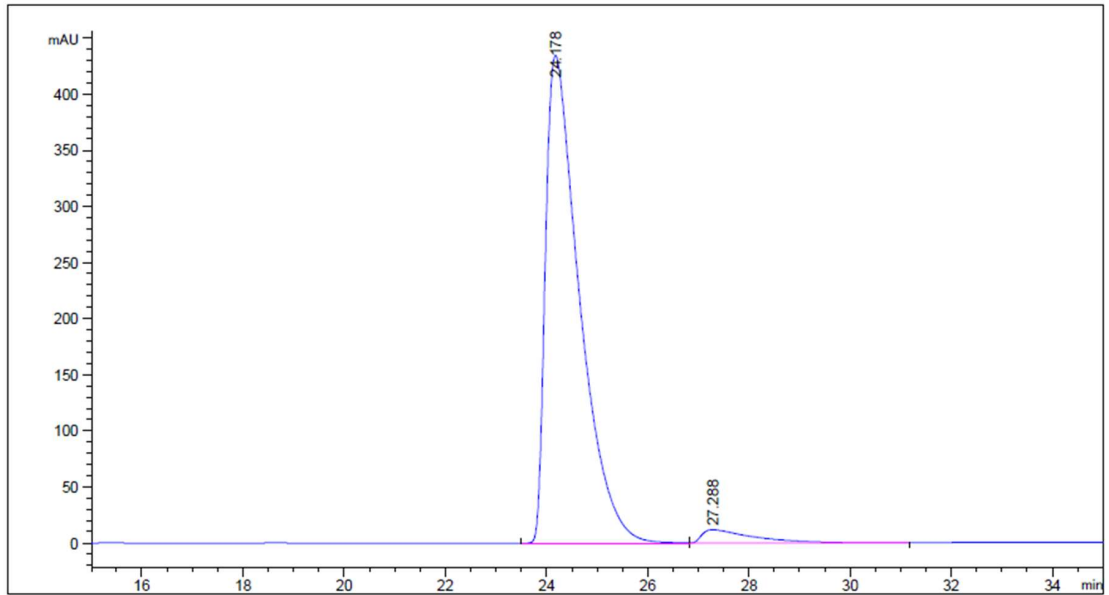

Signal 1: VWD1 A, Wavelength=254 nm

| Peak # | RetTime [min] | Type | Width [min] | Area [mAU*s] | Height [mAU] | Area %  |
|--------|---------------|------|-------------|--------------|--------------|---------|
| 1      | 24.178        | BV   | 0.6978      | 2.01802e4    | 434.50961    | 96.0997 |
| 2      | 27.288        | VB   | 0.9837      | 819.02258    | 11.71386     | 3.9003  |

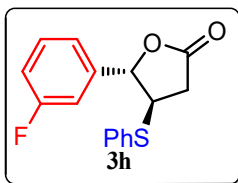

Separation of enantiomers by HPLC, Chiralcel® Column OD-H, 30 °C, n-hexane: *i*-PrOH = 90:10, 1 mL/min.

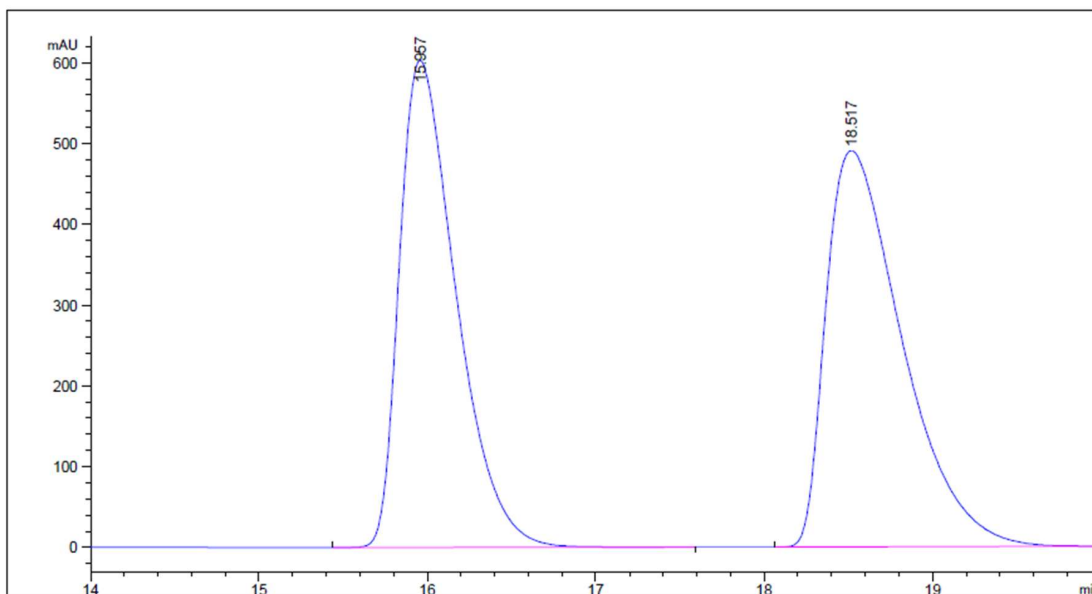

Signal 1: DAD1 B, Sig=254,4 Ref=off

| Peak # | RetTime [min] | Type | Width [min] | Area [mAU*s] | Height [mAU] | Area %  |
|--------|---------------|------|-------------|--------------|--------------|---------|
| 1      | 15.957        | BB   | 0.3590      | 1.40995e4    | 602.54376    | 47.7291 |
| 2      | 18.517        | BB   | 0.4852      | 1.54412e4    | 490.65820    | 52.2709 |

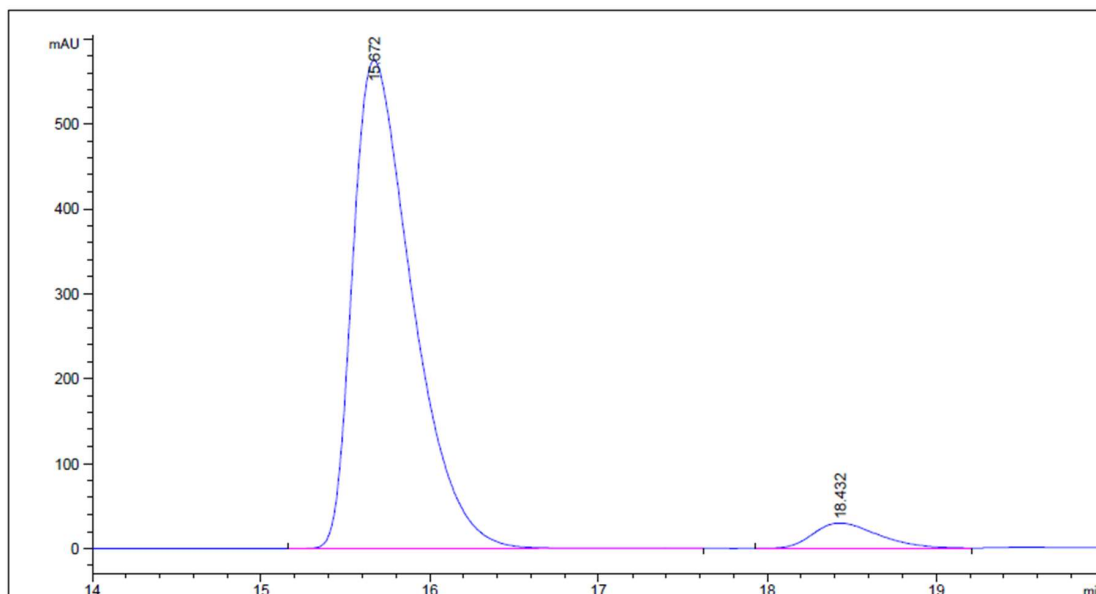

Signal 1: DAD1 B, Sig=254,4 Ref=off

| Peak # | RetTime [min] | Type | Width [min] | Area [mAU*s] | Height [mAU] | Area %  |
|--------|---------------|------|-------------|--------------|--------------|---------|
| 1      | 15.672        | BB   | 0.3736      | 1.40755e4    | 574.90918    | 94.6450 |
| 2      | 18.432        | BB   | 0.4128      | 796.39716    | 29.70049     | 5.3550  |

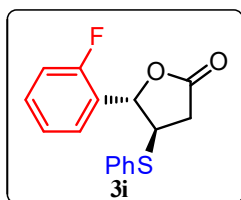

Separation of enantiomers by HPLC, Chiralcel® Column OD-H, 30 °C, n-hexane: *i*-PrOH = 90:10, 1 mL/min.

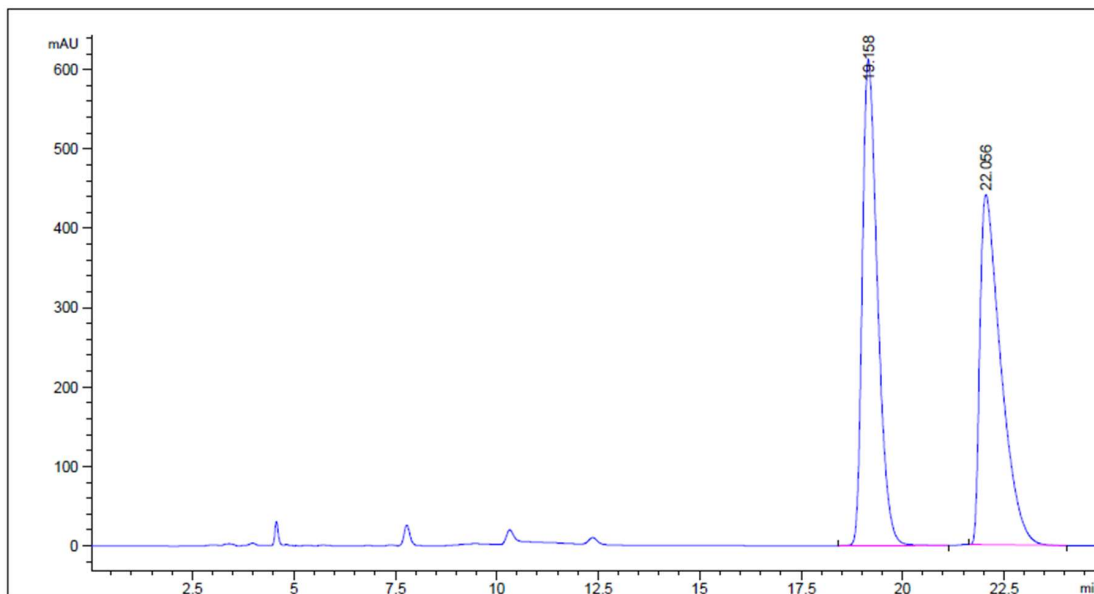

Signal 1: DAD1 B, Sig=254,4 Ref=off

| Peak # | RetTime [min] | Type | Width [min] | Area [mAU*s] | Height [mAU] | Area %  |
|--------|---------------|------|-------------|--------------|--------------|---------|
| 1      | 19.158        | BB   | 0.3997      | 1.59506e4    | 612.67273    | 50.2153 |
| 2      | 22.056        | BBA  | 0.5322      | 1.58138e4    | 441.18546    | 49.7847 |

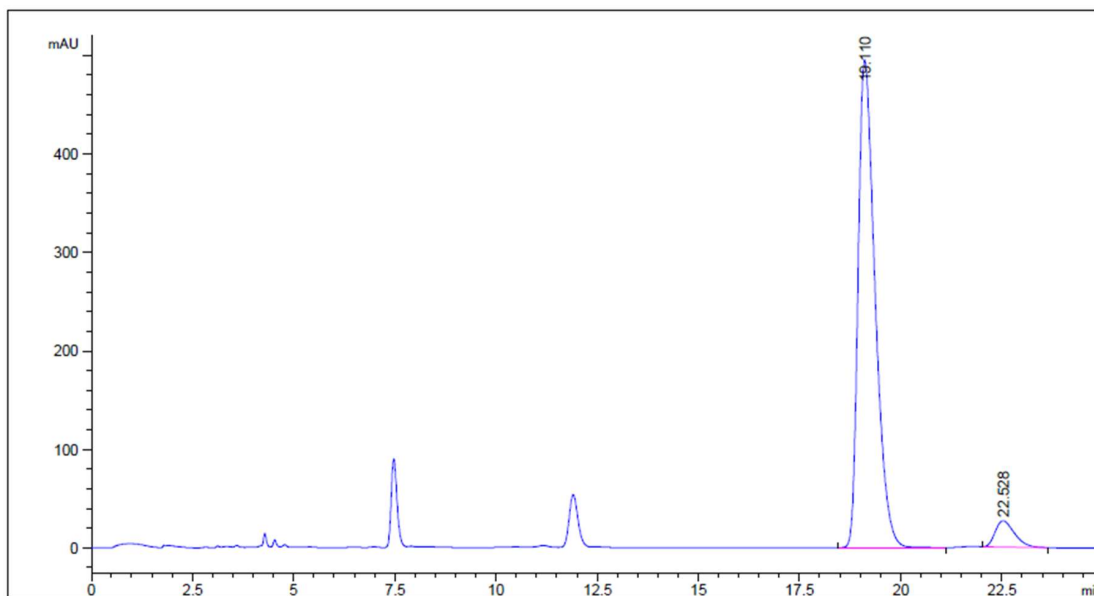

Signal 1: DAD1 B, Sig=254,4 Ref=off

| Peak # | RetTime [min] | Type | Width [min] | Area [mAU*s] | Height [mAU] | Area %  |
|--------|---------------|------|-------------|--------------|--------------|---------|
| 1      | 19.110        | BB   | 0.4450      | 1.43845e4    | 495.04242    | 94.2553 |
| 2      | 22.528        | BB   | 0.5085      | 876.71429    | 26.59950     | 5.7447  |

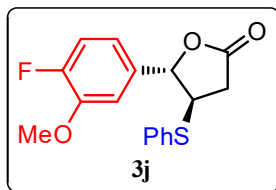

Separation of enantiomers by HPLC, Chiralcel® Column OJ-H, 30 °C, n-hexane: *i*-PrOH = 90:10, 1 mL/min.

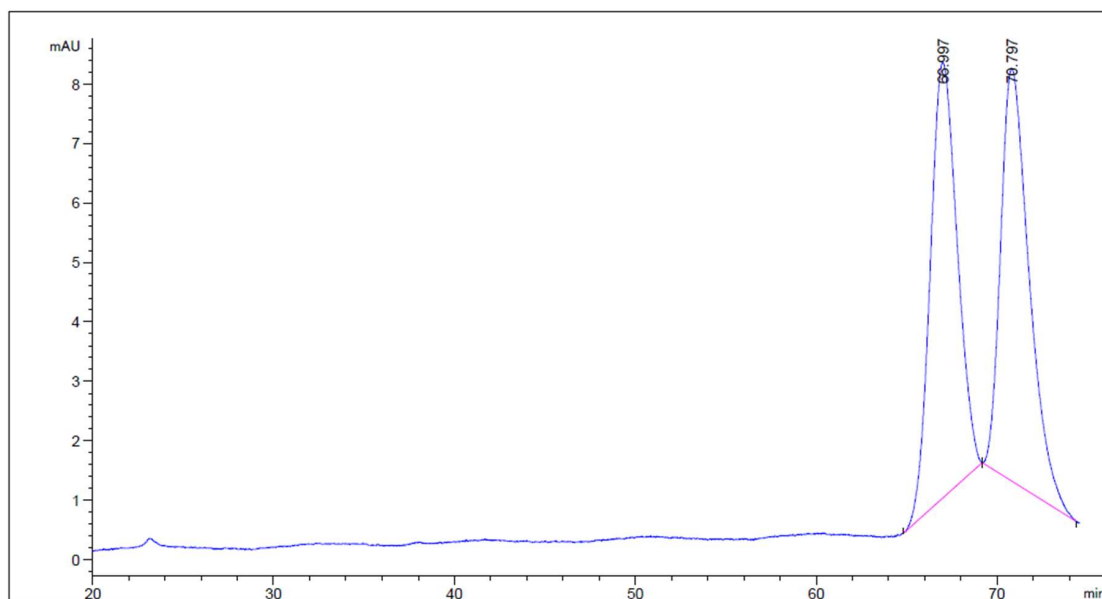

Signal 1: DAD1 B, Sig=254,4 Ref=off

| Peak # | RetTime [min] | Type | Width [min] | Area [mAU*s] | Height [mAU] | Area %  |
|--------|---------------|------|-------------|--------------|--------------|---------|
| 1      | 66.997        | BB   | 1.2220      | 758.53436    | 7.32588      | 49.9175 |
| 2      | 70.797        | BB   | 1.2858      | 761.04199    | 6.93786      | 50.0825 |

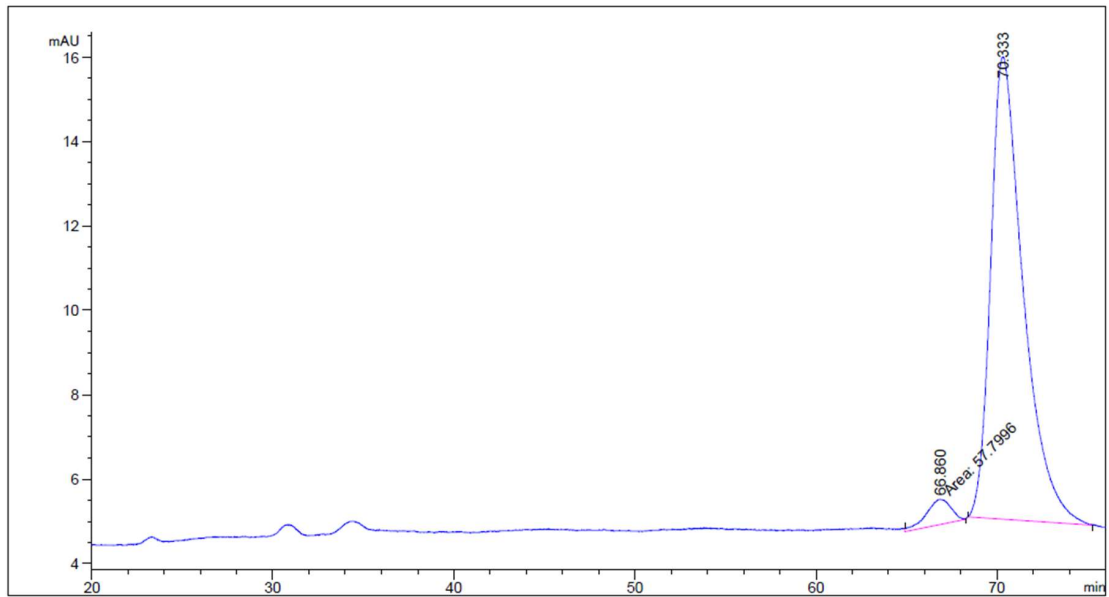

Signal 1: DAD1 B, Sig=254,4 Ref=off

| Peak # | RetTime [min] | Type | Width [min] | Area [mAU*s] | Height [mAU] | Area %  |
|--------|---------------|------|-------------|--------------|--------------|---------|
| 1      | 66.860        | MM   | 1.4970      | 52.20176     | 5.81198e-1   | 3.6597  |
| 2      | 70.333        | BB   | 1.5235      | 1374.19189   | 10.95499     | 96.3403 |

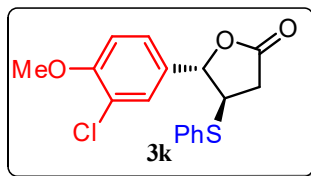

Separation of enantiomers by HPLC, Chiralcel® Column IC, 30 °C, n-hexane: *i*-PrOH = 88:12, 1 mL/min.

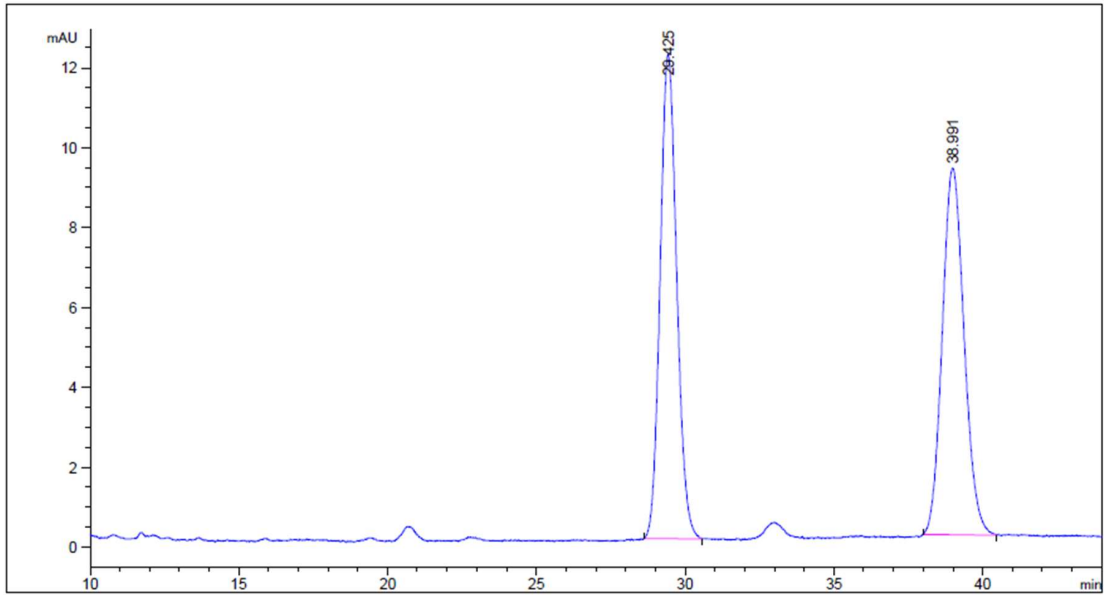

Signal 1: DAD1 B, Sig=254,4 Ref=off

| Peak # | RetTime [min] | Type | Width [min] | Area [mAU*s] | Height [mAU] | Area %  |
|--------|---------------|------|-------------|--------------|--------------|---------|
| 1      | 29.425        | BB   | 0.5835      | 469.42480    | 12.13025     | 50.0686 |
| 2      | 38.991        | BB   | 0.6672      | 468.13934    | 9.17569      | 49.9314 |

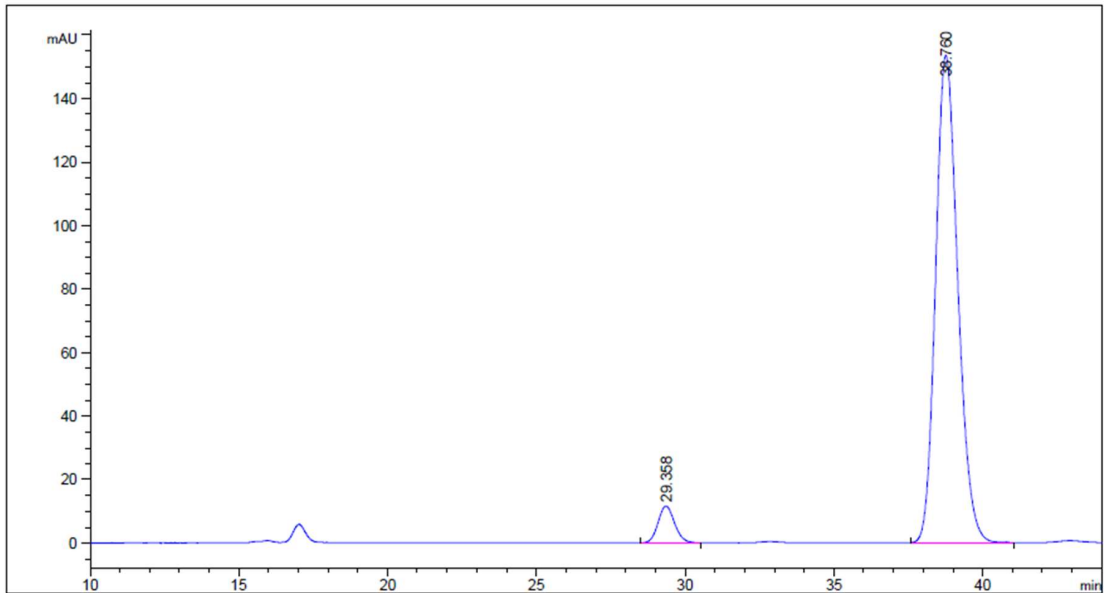

Signal 1: DAD1 B, Sig=254,4 Ref=off

| Peak # | RetTime [min] | Type | Width [min] | Area [mAU*s] | Height [mAU] | Area %  |
|--------|---------------|------|-------------|--------------|--------------|---------|
| 1      | 29.358        | BB   | 0.5679      | 445.59506    | 11.55458     | 5.3099  |
| 2      | 38.760        | BB   | 0.8002      | 7946.19775   | 153.44635    | 94.6901 |

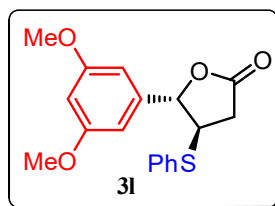

Separation of enantiomers by HPLC, Chiralcel® Column OD-H, 30 °C, n-hexane: *i*-PrOH = 70:30, 1 mL/min.

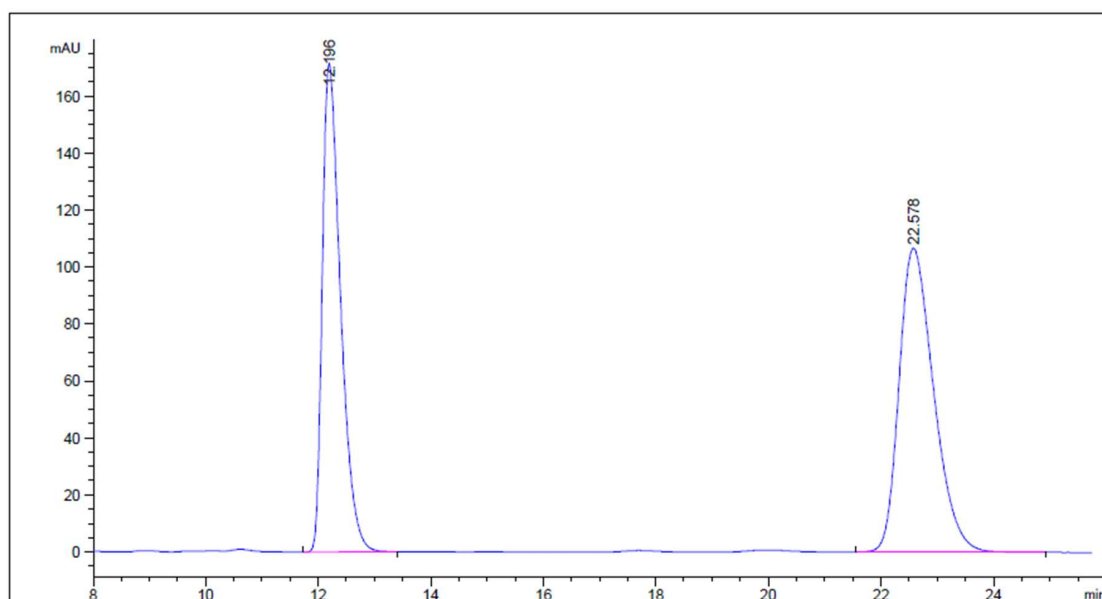

Signal 1: DAD1 B, Sig=254,4 Ref=off

| Peak # | RetTime [min] | Type | Width [min] | Area [mAU*s] | Height [mAU] | Area %  |
|--------|---------------|------|-------------|--------------|--------------|---------|
| 1      | 12.196        | BB   | 0.3445      | 3855.86377   | 171.35959    | 45.8891 |
| 2      | 22.578        | BB   | 0.6551      | 4546.70801   | 106.69806    | 54.1109 |



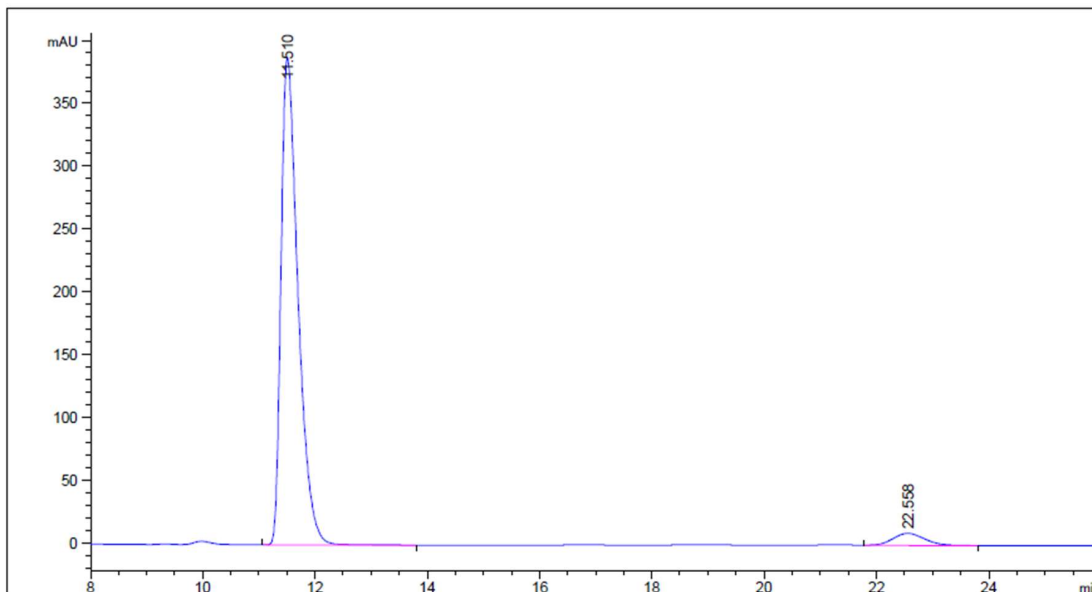

Signal 1: VWD1 A, Wavelength=254 nm

| Peak # | RetTime [min] | Type | Width [min] | Area [mAU*s] | Height [mAU] | Area %  |
|--------|---------------|------|-------------|--------------|--------------|---------|
| 1      | 11.510        | BB   | 0.3196      | 8158.76367   | 387.51880    | 95.6536 |
| 2      | 22.558        | BB   | 0.6049      | 370.72568    | 9.54942      | 4.3464  |

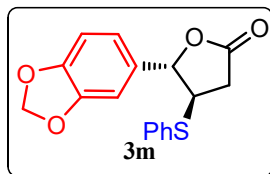

Separation of enantiomers by HPLC, Chiralcel® Column OD-H, 30 °C, n-hexane: *i*-PrOH = 90:10, 1 mL/min.

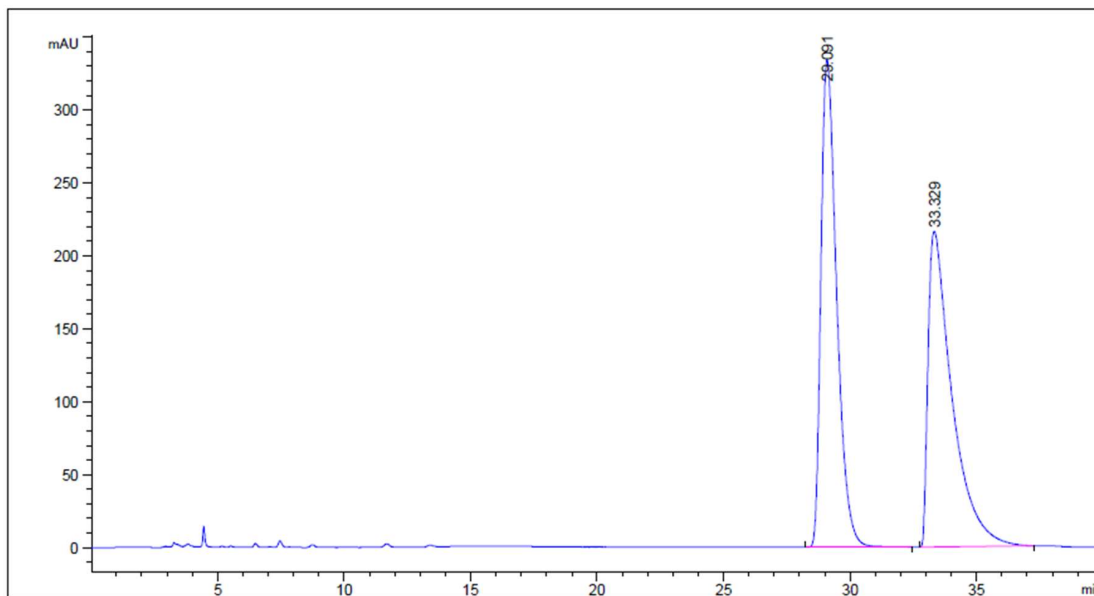

Signal 1: DAD1 B, Sig=254,4 Ref=off

| Peak # | RetTime [min] | Type | Width [min] | Area [mAU*s] | Height [mAU] | Area %  |
|--------|---------------|------|-------------|--------------|--------------|---------|
| 1      | 29.091        | BB   | 0.6611      | 1.44138e4    | 334.25522    | 50.3234 |
| 2      | 33.329        | BB   | 0.9558      | 1.42285e4    | 216.20981    | 49.6766 |

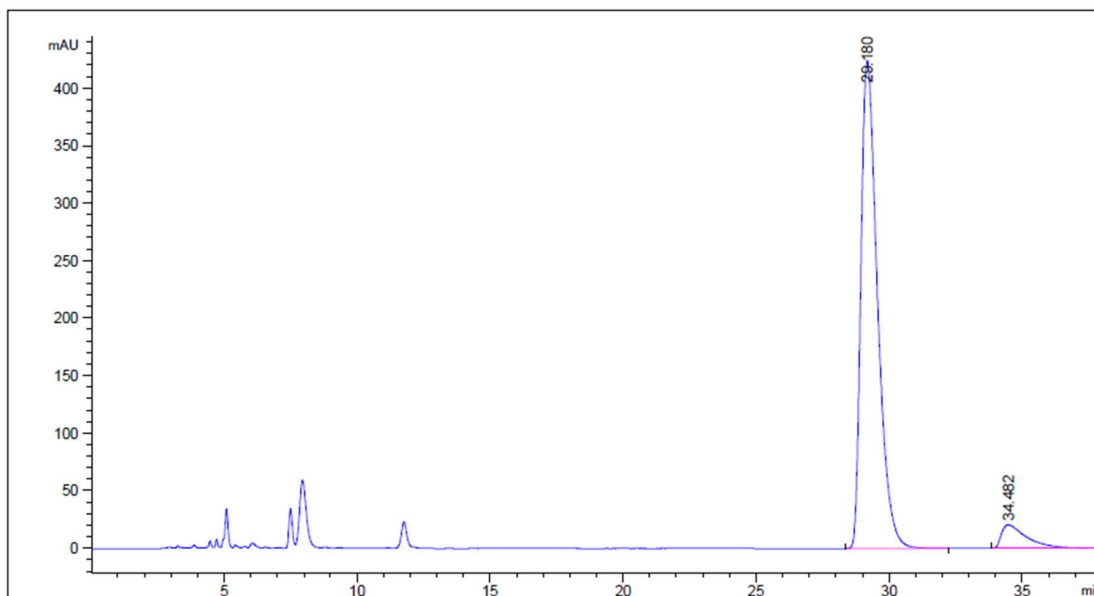

Signal 1: DAD1 B, Sig=254,4 Ref=off

| Peak # | RetTime [min] | Type | Width [min] | Area [mAU*s] | Height [mAU] | Area %  |
|--------|---------------|------|-------------|--------------|--------------|---------|
| 1      | 29.180        | BB   | 0.6628      | 1.83387e4    | 423.87427    | 93.2330 |
| 2      | 34.482        | BB   | 0.9296      | 1331.05591   | 20.28225     | 6.7670  |

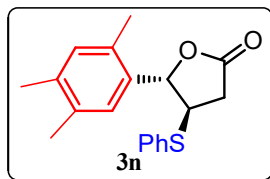

Separation of enantiomers by HPLC, Chiralcel® Column OD-H, 30 °C, n-hexane: *i*-PrOH = 93:7, 1 mL/min.

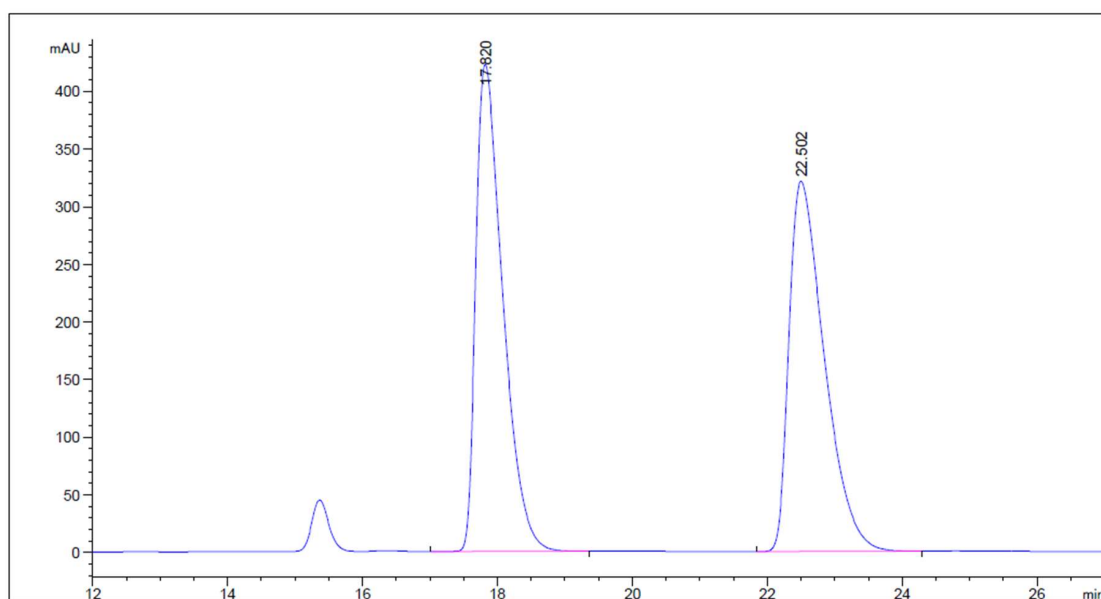

Signal 1: DAD1 B, Sig=254,4 Ref=off

| Peak # | RetTime [min] | Type | Width [min] | Area [mAU*s] | Height [mAU] | Area %  |
|--------|---------------|------|-------------|--------------|--------------|---------|
| 1      | 17.820        | BB   | 0.4222      | 1.17413e4    | 422.51422    | 50.1121 |
| 2      | 22.502        | BB   | 0.5566      | 1.16888e4    | 321.16843    | 49.8879 |

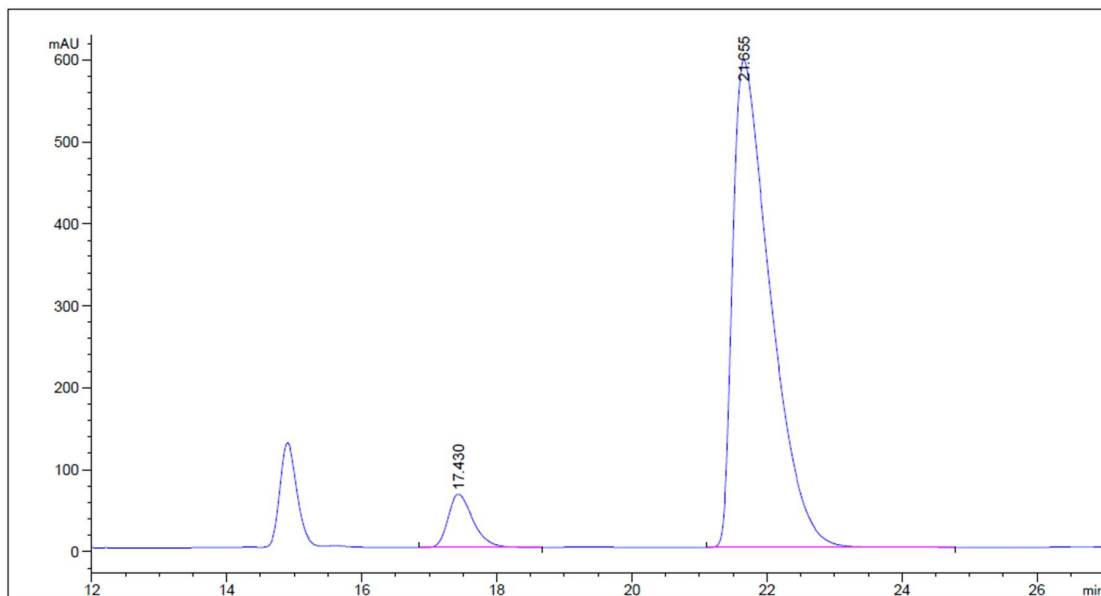

Signal 1: DAD1 B, Sig=254,4 Ref=off

| Peak # | RetTime [min] | Type | Width [min] | Area [mAU*s] | Height [mAU] | Area %  |
|--------|---------------|------|-------------|--------------|--------------|---------|
| 1      | 17.430        | BB   | 0.3931      | 1669.38037   | 65.11443     | 6.7542  |
| 2      | 21.655        | BB   | 0.5819      | 2.30470e4    | 595.02740    | 93.2458 |

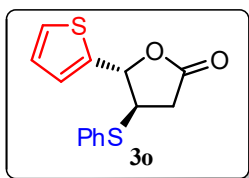

Separation of enantiomers by HPLC, Chiralcel® Column OD-H, 30 °C, n-hexane: *i*-PrOH = 93:7, 1 mL/min.

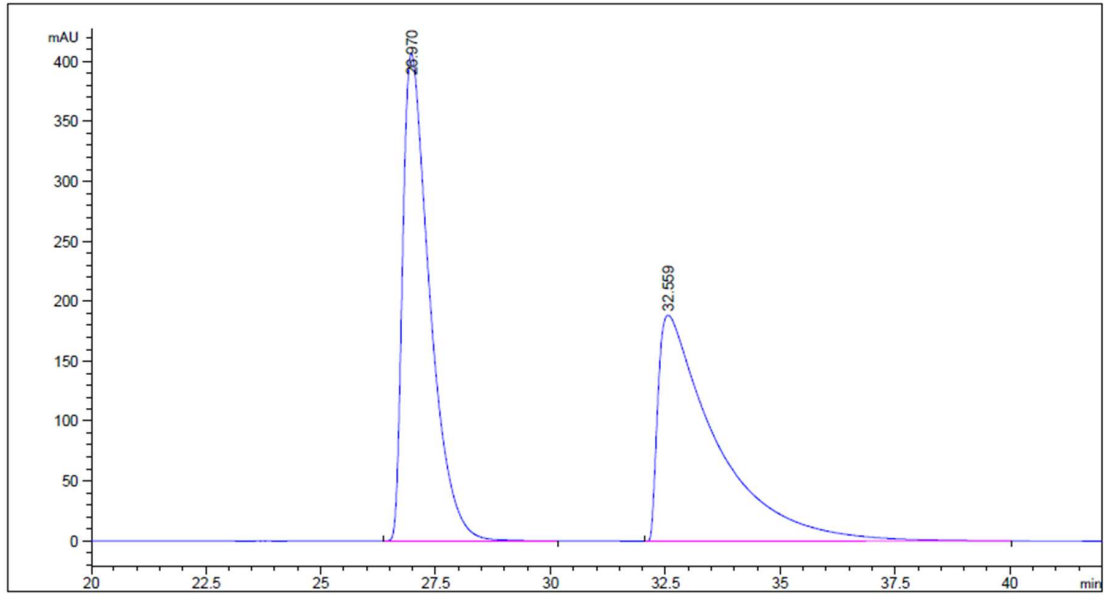

Signal 1: DAD1 D, Sig=230,4 Ref=off

| Peak # | RetTime [min] | Type | Width [min] | Area [mAU*s] | Height [mAU] | Area %  |
|--------|---------------|------|-------------|--------------|--------------|---------|
| 1      | 26.970        | BB   | 0.6144      | 1.66014e4    | 406.52188    | 50.0735 |
| 2      | 32.559        | BB   | 1.2008      | 1.65526e4    | 188.44669    | 49.9265 |

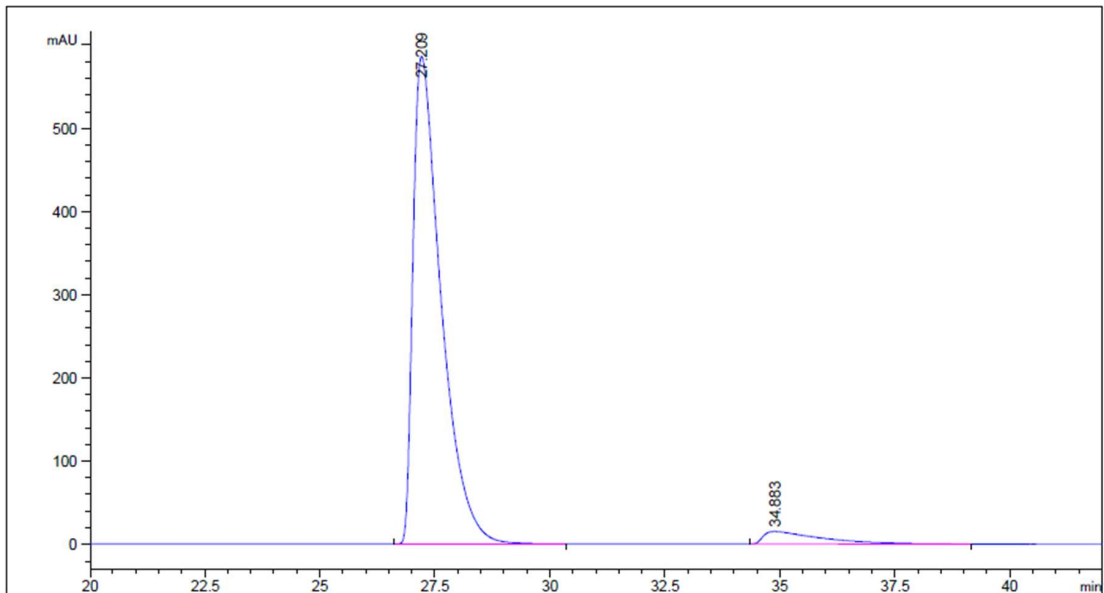

Signal 1: DAD1 D, Sig=230,4 Ref=off

| Peak # | RetTime [min] | Type | Width [min] | Area [mAU*s] | Height [mAU] | Area %  |
|--------|---------------|------|-------------|--------------|--------------|---------|
| 1      | 27.209        | BB   | 0.6343      | 2.49081e4    | 585.56464    | 95.0757 |
| 2      | 34.883        | BB   | 1.1412      | 1290.06580   | 14.91418     | 4.9243  |

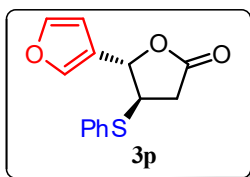

Separation of enantiomers by HPLC, Chiralcel® Column OD-H, 30 °C, n-hexane: *i*-PrOH = 85:15, 1 mL/min.

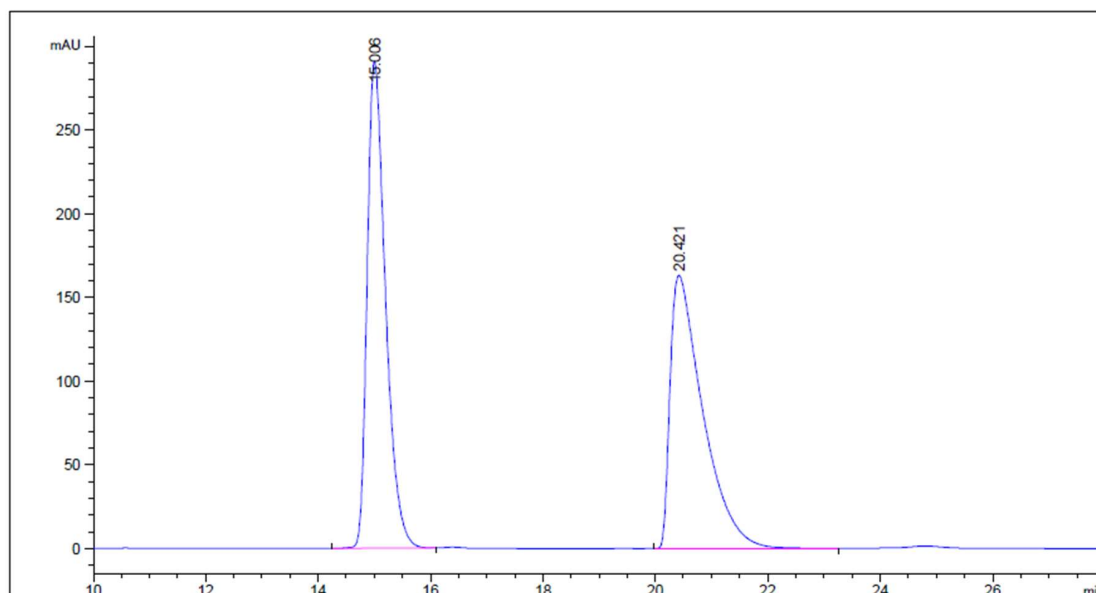

Signal 1: VWD1 A, Wavelength=254 nm

| Peak # | RetTime [min] | Type | Width [min] | Area [mAU*s] | Height [mAU] | Area %  |
|--------|---------------|------|-------------|--------------|--------------|---------|
| 1      | 15.006        | BB   | 0.3462      | 6587.55664   | 290.92068    | 49.9737 |
| 2      | 20.421        | BB   | 0.5956      | 6594.47852   | 163.13556    | 50.0263 |

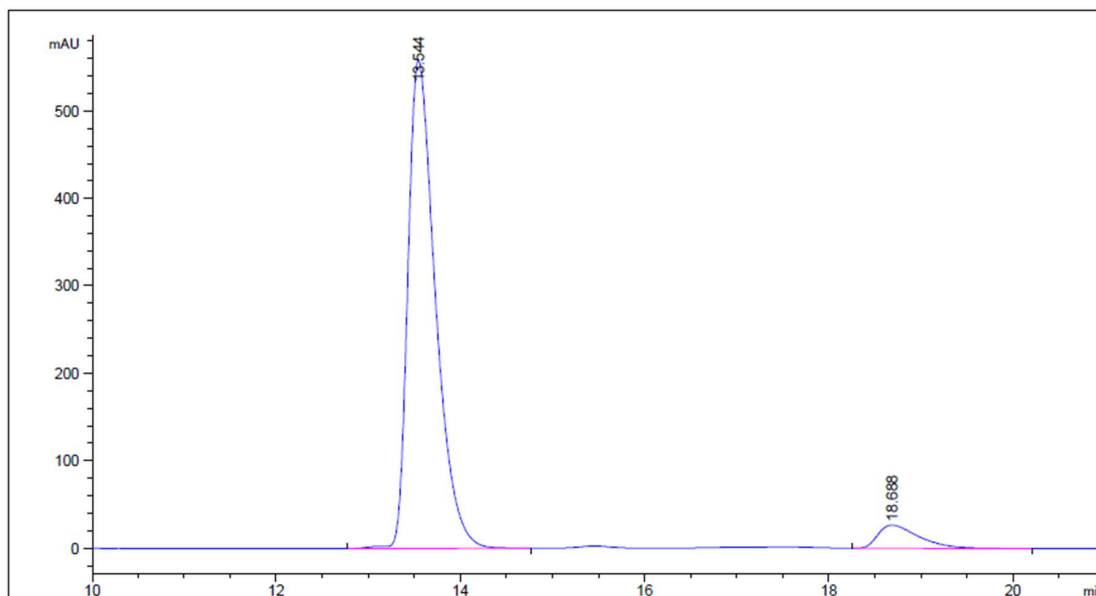

Signal 1: DAD1 B, Sig=254,4 Ref=off

| Peak # | RetTime [min] | Type | Width [min] | Area [mAU*s] | Height [mAU] | Area %  |
|--------|---------------|------|-------------|--------------|--------------|---------|
| 1      | 13.544        | VB R | 0.3174      | 1.15855e4    | 558.35229    | 93.4226 |
| 2      | 18.688        | BB   | 0.4541      | 815.68005    | 26.57772     | 6.5774  |

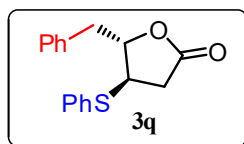

Separation of enantiomers by HPLC, Chiralcel® Column OJ-H, 30 °C, n-hexane: *i*-PrOH = 88:12, 1 mL/min.

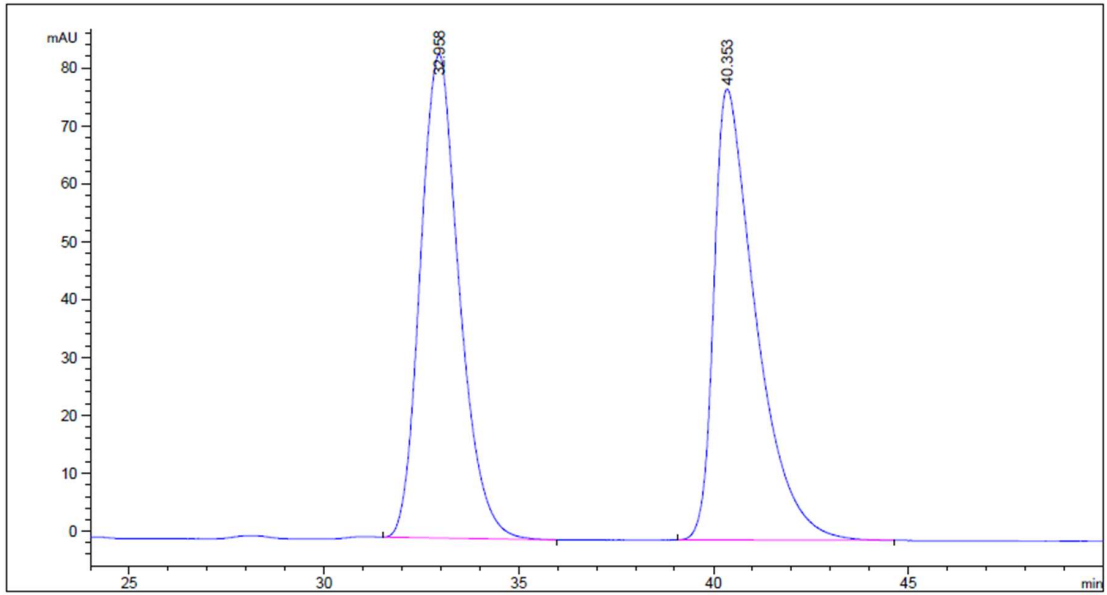

Signal 1: DAD1 B, Sig=254,4 Ref=off

| Peak # | RetTime [min] | Type | Width [min] | Area [mAU*s] | Height [mAU] | Area %  |
|--------|---------------|------|-------------|--------------|--------------|---------|
| 1      | 32.958        | BB   | 1.0461      | 5801.50586   | 83.54620     | 49.8464 |
| 2      | 40.353        | BB   | 1.0742      | 5837.24854   | 77.90540     | 50.1536 |

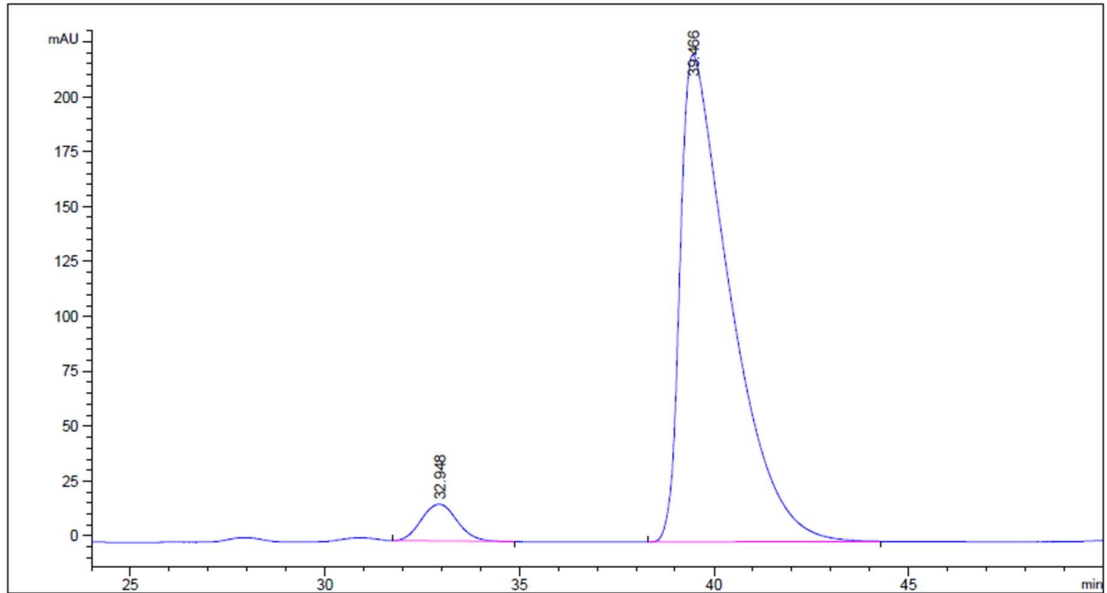



Signal 1: DAD1 B, Sig=254,4 Ref=off

| Peak # | RetTime [min] | Type | Width [min] | Area [mAU*s] | Height [mAU] | Area %  |
|--------|---------------|------|-------------|--------------|--------------|---------|
| 1      | 32.948        | BB   | 0.9516      | 1080.20691   | 16.81145     | 5.1548  |
| 2      | 39.466        | BB   | 1.2718      | 1.98753e4    | 221.72658    | 94.8452 |

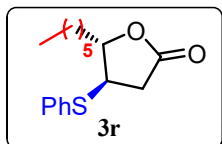

Separation of enantiomers by HPLC, Chiralcel® Column OD-H, 30 °C, n-hexane: *i*-PrOH = 88:12, 1 mL/min.

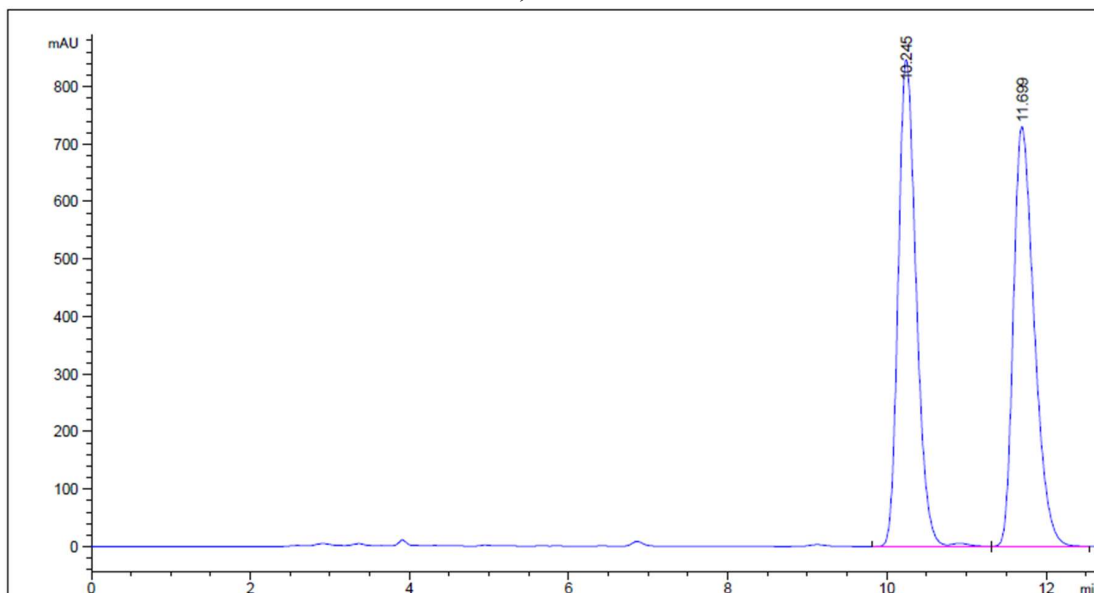

Signal 1: VWD1 A, Wavelength=254 nm

| Peak # | RetTime [min] | Type | Width [min] | Area [mAU*s] | Height [mAU] | Area %  |
|--------|---------------|------|-------------|--------------|--------------|---------|
| 1      | 10.245        | BV R | 0.2419      | 1.32836e4    | 846.80975    | 50.0915 |
| 2      | 11.699        | BB   | 0.2796      | 1.32350e4    | 729.85736    | 49.9085 |

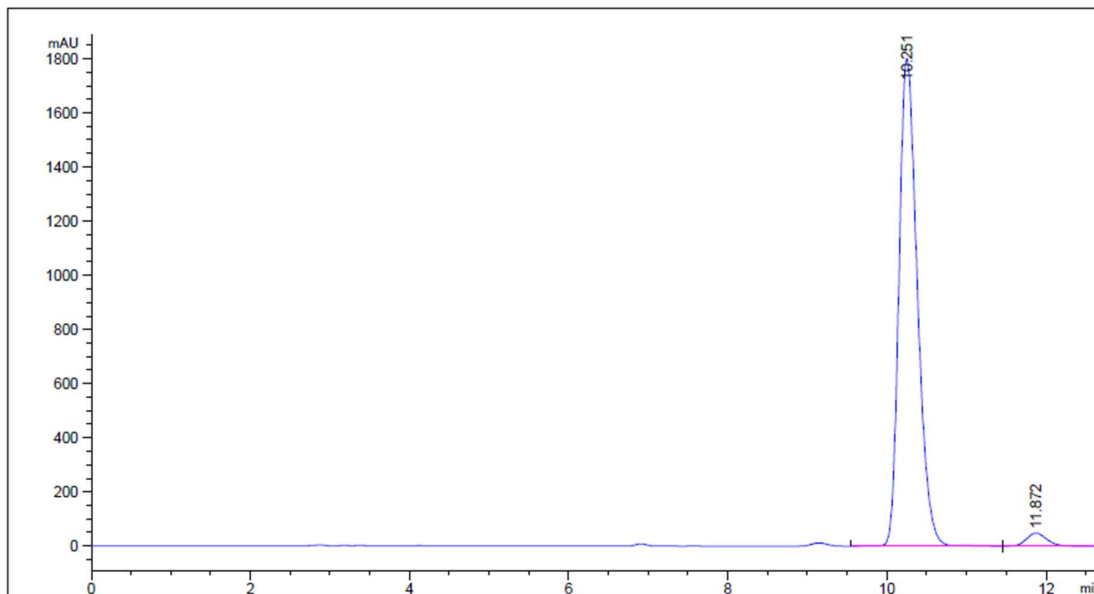

Signal 1: VWD1 A, Wavelength=254 nm

| Peak # | RetTime [min] | Type | Width [min] | Area [mAU*s] | Height [mAU] | Area %  |
|--------|---------------|------|-------------|--------------|--------------|---------|
| 1      | 10.251        | BV R | 0.2478      | 2.87464e4    | 1801.26587   | 97.1136 |
| 2      | 11.872        | VB   | 0.2757      | 854.40991    | 47.99118     | 2.8864  |

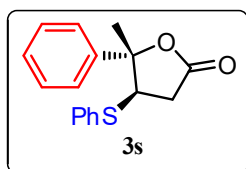

Separation of enantiomers by HPLC, Chiralcel® Column OD-H, 30 °C, n-hexane: *i*-PrOH = 90:10, 1 mL/min.

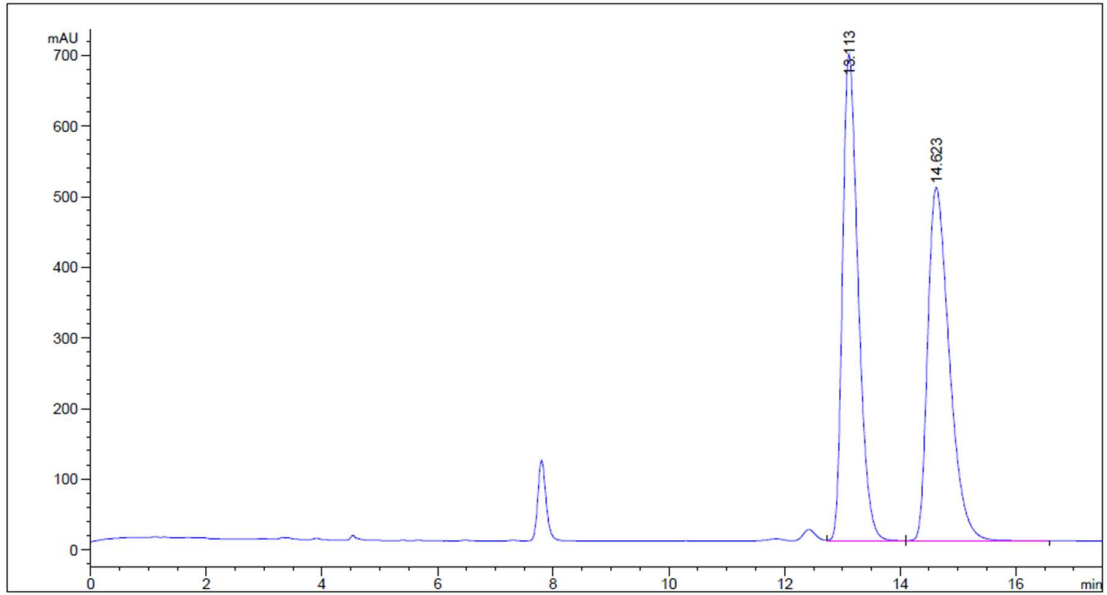

Signal 1: DAD1 B, Sig=254,4 Ref=off

| Peak # | RetTime [min] | Type | Width [min] | Area [mAU*s] | Height [mAU] | Area %  |
|--------|---------------|------|-------------|--------------|--------------|---------|
| 1      | 13.113        | VB   | 0.2890      | 1.29319e4    | 688.93884    | 50.0455 |
| 2      | 14.623        | BB   | 0.3992      | 1.29083e4    | 499.95743    | 49.9545 |

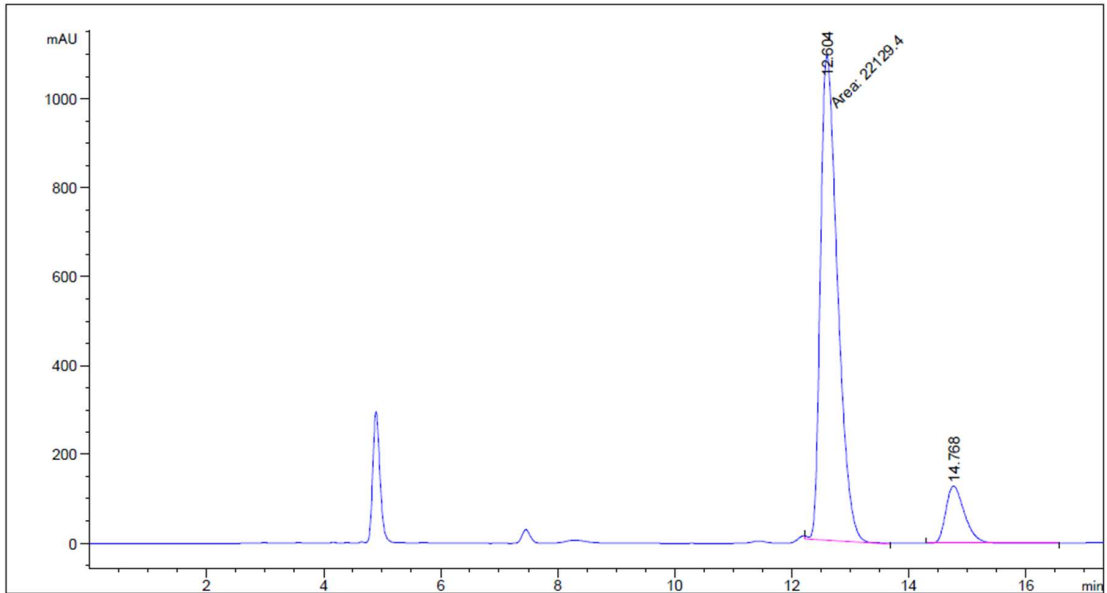

Signal 1: DAD1 B, Sig=254,4 Ref=off

| Peak # | RetTime [min] | Type | Width [min] | Area [mAU*s] | Height [mAU] | Area %  |
|--------|---------------|------|-------------|--------------|--------------|---------|
| 1      | 12.604        | MM   | 0.3379      | 2.21294e4    | 1091.43079   | 88.6130 |
| 2      | 14.768        | BB   | 0.3400      | 2843.69189   | 128.58479    | 11.3870 |

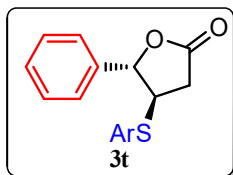

Separation of enantiomers by HPLC, Chiralcel® Column OD-H, 30 °C, n-hexane: *i*-PrOH = 85:15, 1 mL/min.

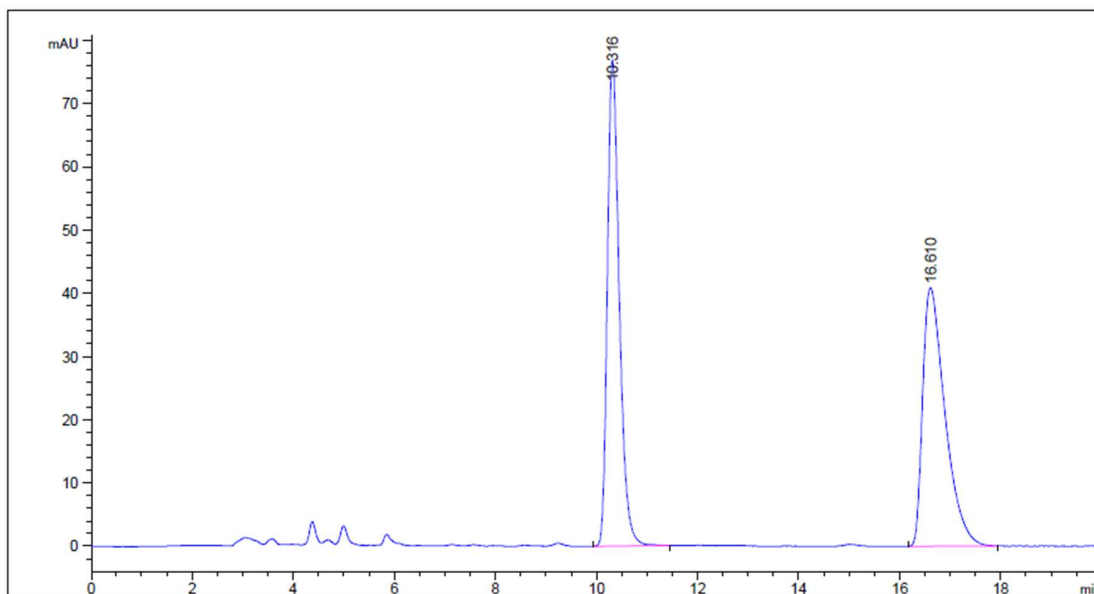

Signal 1: DAD1 B, Sig=254,4 Ref=off

| Peak # | RetTime [min] | Type | Width [min] | Area [mAU*s] | Height [mAU] | Area %  |
|--------|---------------|------|-------------|--------------|--------------|---------|
| 1      | 10.316        | BB   | 0.2515      | 1263.07629   | 76.93445     | 50.1662 |
| 2      | 16.610        | BB   | 0.4596      | 1254.70691   | 40.93485     | 49.8338 |

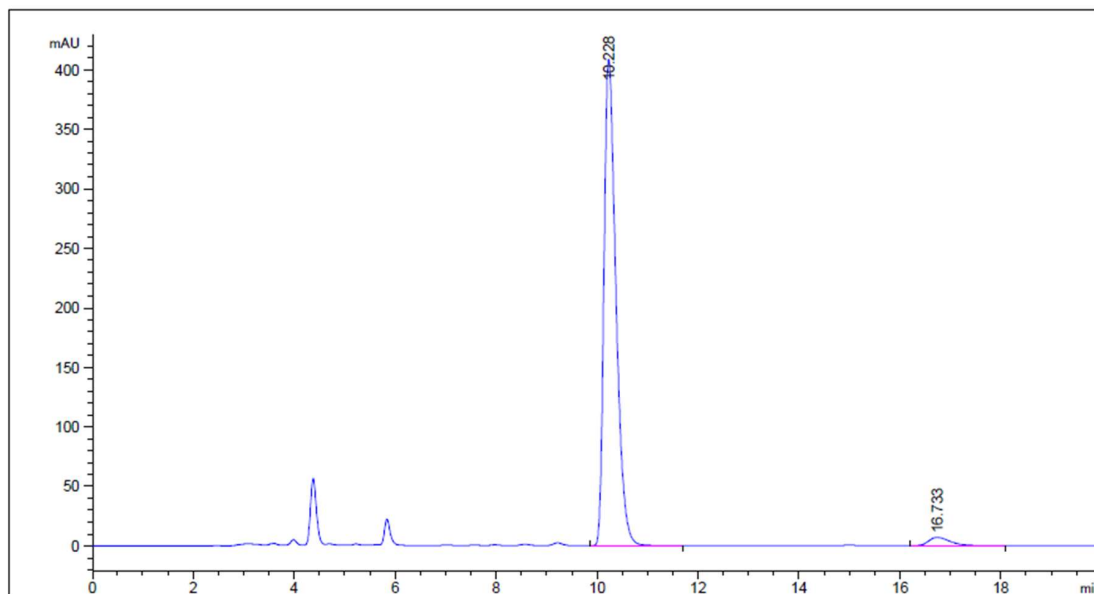

Signal 1: DAD1 B, Sig=254,4 Ref=off

| Peak # | RetTime [min] | Type | Width [min] | Area [mAU*s] | Height [mAU] | Area %  |
|--------|---------------|------|-------------|--------------|--------------|---------|
| 1      | 10.228        | BB   | 0.2520      | 6725.42480   | 408.56396    | 97.0449 |
| 2      | 16.733        | BB   | 0.4206      | 204.79640    | 6.97314      | 2.9551  |

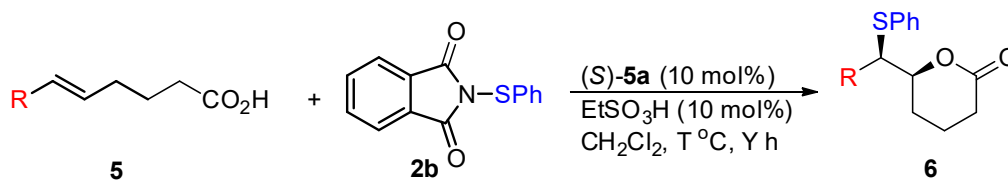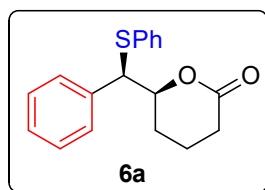

Separation of enantiomers by HPLC, Chiralcel® Column AD-H, 30 °C, n-hexane: *i*-PrOH = 90:10, 1 mL/min.

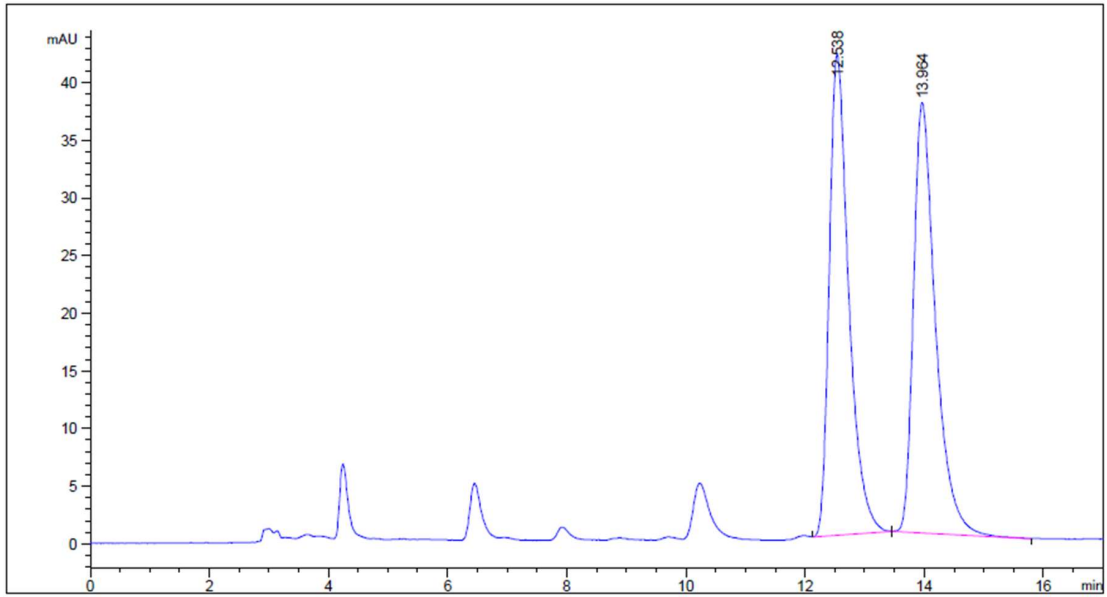

Signal 1: DAD1 B, Sig=254,4 Ref=off

| Peak # | RetTime [min] | Type | Width [min] | Area [mAU*s] | Height [mAU] | Area %  |
|--------|---------------|------|-------------|--------------|--------------|---------|
| 1      | 12.538        | BB   | 0.3410      | 946.40668    | 41.67130     | 49.7658 |
| 2      | 13.964        | BB   | 0.3827      | 955.31482    | 37.31761     | 50.2342 |

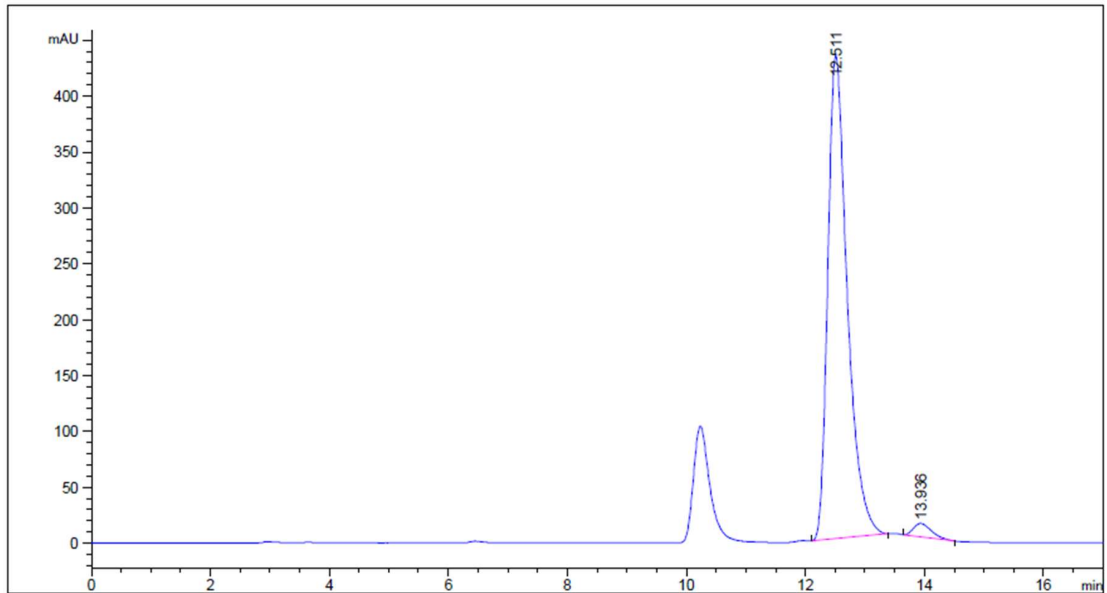

Signal 1: DAD1 B, Sig=254,4 Ref=off

| Peak # | RetTime [min] | Type | Width [min] | Area [mAU*s] | Height [mAU] | Area %  |
|--------|---------------|------|-------------|--------------|--------------|---------|
| 1      | 12.511        | BB   | 0.3431      | 9833.28223   | 432.72348    | 97.5254 |
| 2      | 13.936        | BB   | 0.3228      | 249.50914    | 11.89124     | 2.4746  |

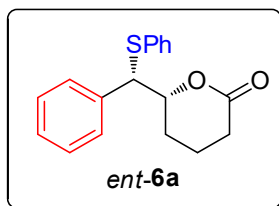

Separation of enantiomers by HPLC, Chiralcel® Column AD-H, 30 °C, n-hexane: *i*-PrOH = 90:10, 1 mL/min.

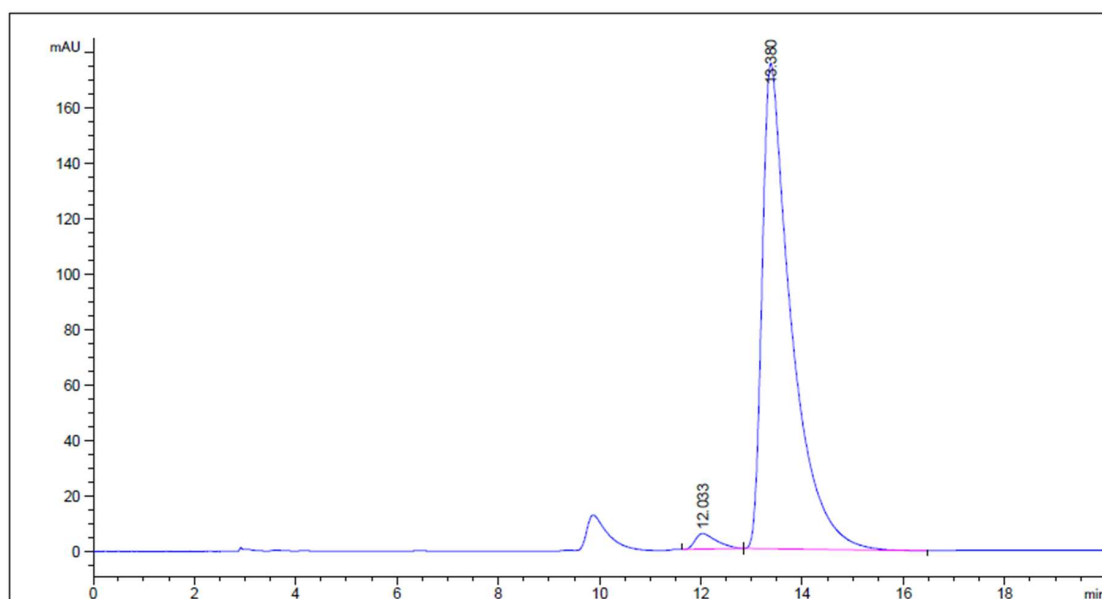

Signal 1: DAD1 B, Sig=254,4 Ref=off

| Peak # | RetTime [min] | Type | Width [min] | Area [mAU*s] | Height [mAU] | Area %  |
|--------|---------------|------|-------------|--------------|--------------|---------|
| 1      | 12.033        | BB   | 0.4106      | 165.28850    | 5.66151      | 2.3057  |
| 2      | 13.380        | BB   | 0.5624      | 7003.54492   | 175.19321    | 97.6943 |

1 gram-scale 6-*exo* lactoniation of **ent-6a**

Separation of enantiomers by HPLC, Chiralcel® Column AD-H, 30 °C, n-hexane: *i*-PrOH = 90:10, 1 mL/min.

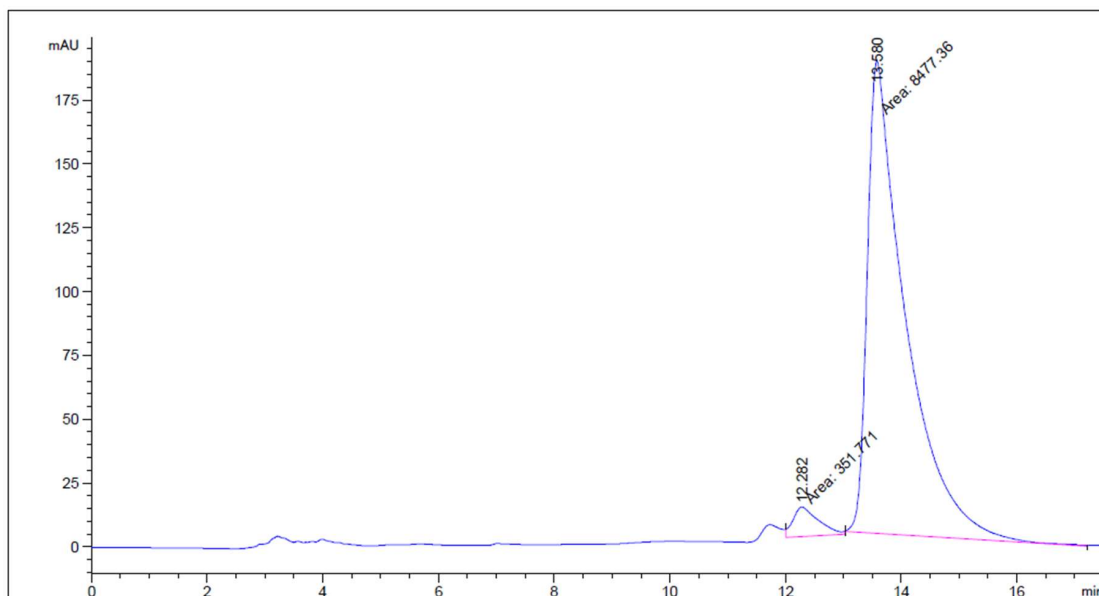

Signal 1: DAD1 B, Sig=254,4 Ref=off

| Peak # | RetTime [min] | Type | Width [min] | Area [mAU*s] | Height [mAU] | Area %  |
|--------|---------------|------|-------------|--------------|--------------|---------|
| 1      | 12.282        | MM   | 0.5096      | 351.77063    | 11.50445     | 3.9842  |
| 2      | 13.580        | MM   | 0.7645      | 8477.36230   | 184.82449    | 96.0158 |

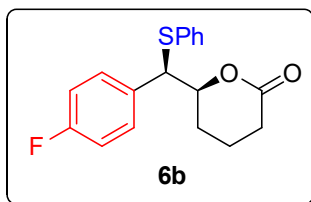

Separation of enantiomers by HPLC, Chiralcel® Column OD-H, 30 °C, n-hexane: *i*-PrOH = 70:30, 1 mL/min.



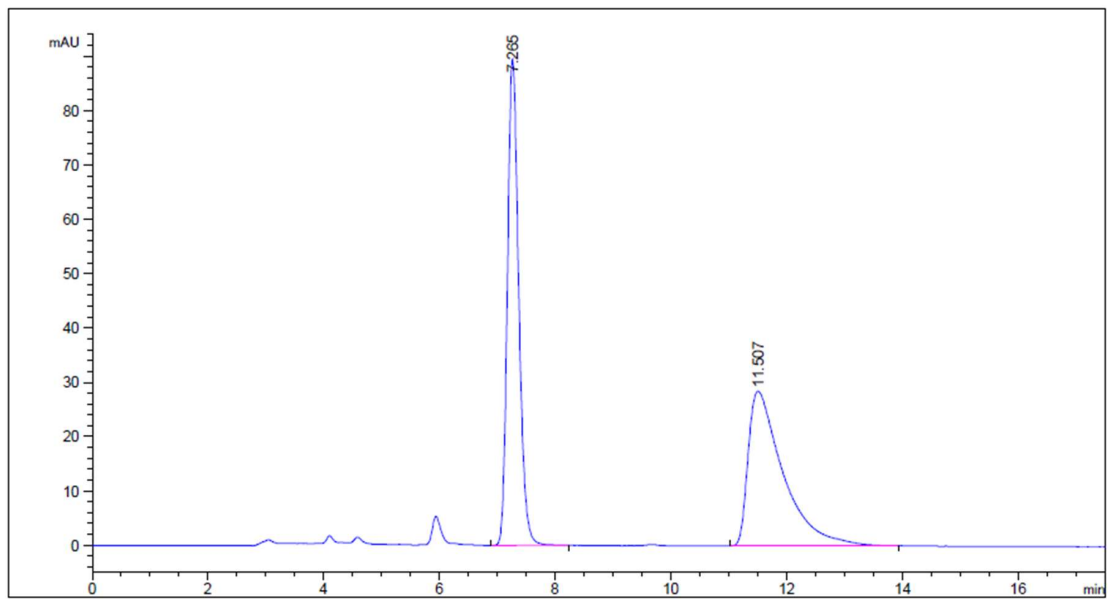

Signal 1: DAD1 B, Sig=254,4 Ref=off

| Peak # | RetTime [min] | Type | Width [min] | Area [mAU*s] | Height [mAU] | Area %  |
|--------|---------------|------|-------------|--------------|--------------|---------|
| 1      | 7.265         | BB   | 0.2095      | 1210.16602   | 89.61892     | 50.3423 |
| 2      | 11.507        | BB   | 0.6053      | 1193.71045   | 28.45974     | 49.6577 |

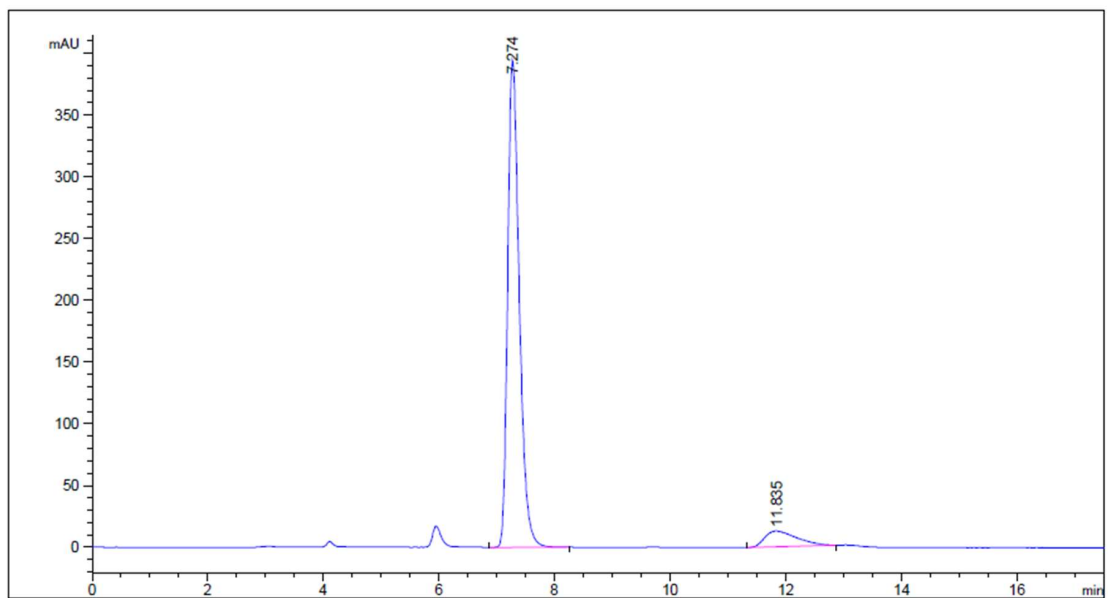

Signal 1: DAD1 B, Sig=254,4 Ref=off

| Peak # | RetTime [min] | Type | Width [min] | Area [mAU*s] | Height [mAU] | Area %  |
|--------|---------------|------|-------------|--------------|--------------|---------|
| 1      | 7.274         | BB   | 0.2145      | 5494.76367   | 394.58136    | 91.8150 |
| 2      | 11.835        | BB   | 0.5474      | 489.84109    | 12.77272     | 8.1850  |

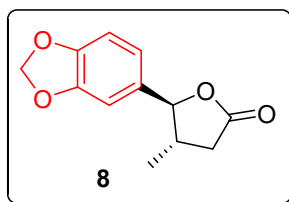

Separation of enantiomers by HPLC, Chiralcel® Column OD-H, 30 °C, n-hexane: *i*-PrOH = 70:30, 1 mL/min.

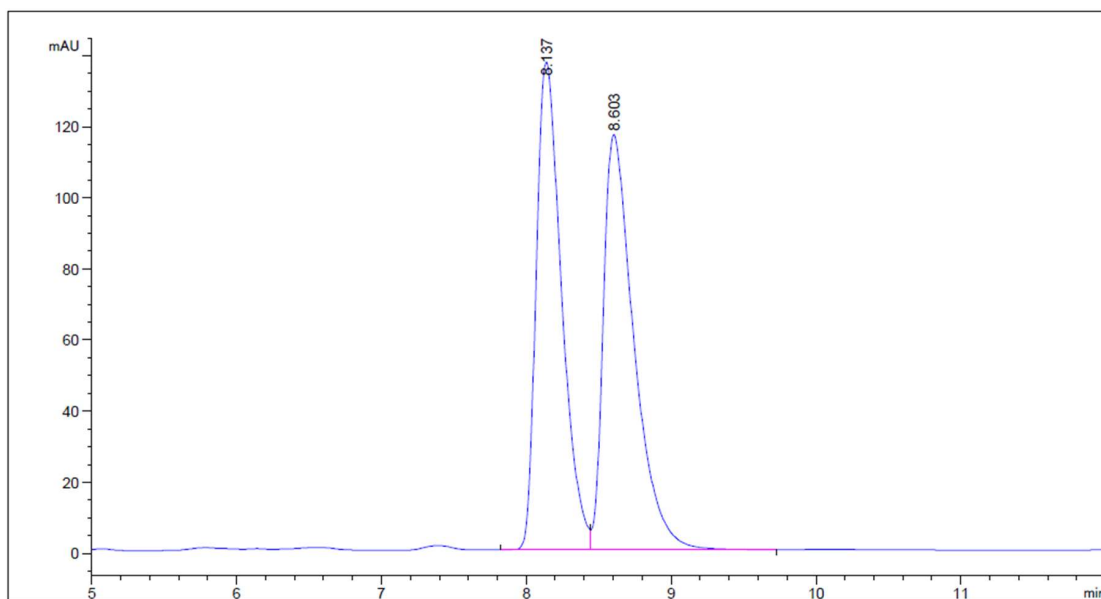

Signal 1: DAD1 B, Sig=254,4 Ref=off

| Peak # | RetTime [min] | Type | Width [min] | Area [mAU*s] | Height [mAU] | Area %  |
|--------|---------------|------|-------------|--------------|--------------|---------|
| 1      | 8.137         | BV   | 0.1880      | 1668.77979   | 137.12631    | 49.3328 |
| 2      | 8.603         | VB   | 0.2212      | 1713.91809   | 116.77088    | 50.6672 |

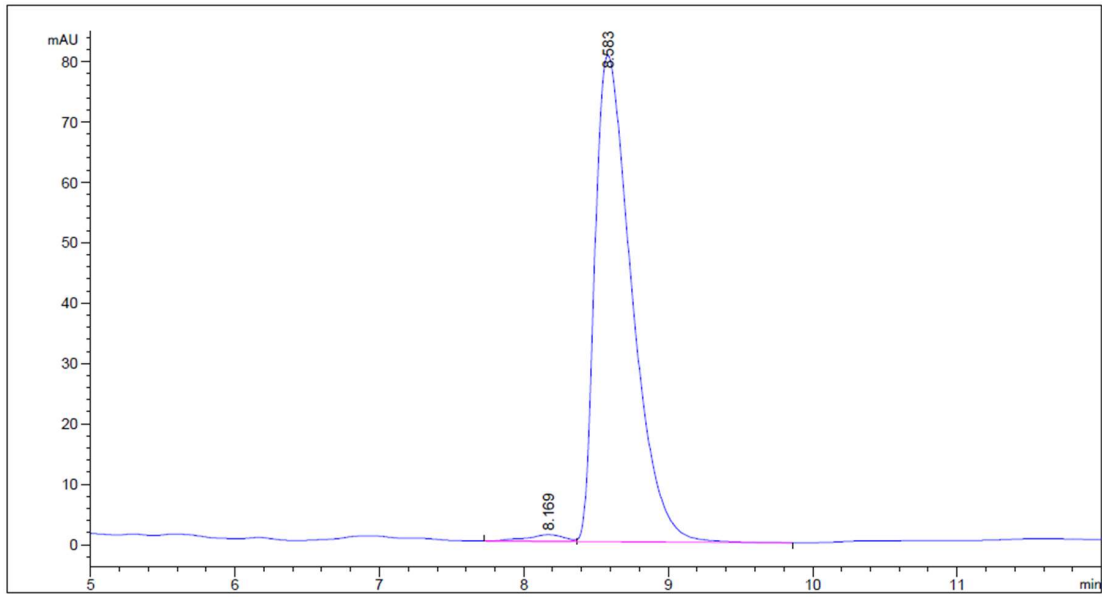

Signal 1: DAD1 B, Sig=254,4 Ref=off

| Peak # | RetTime [min] | Type | Width [min] | Area [mAU*s] | Height [mAU] | Area %  |
|--------|---------------|------|-------------|--------------|--------------|---------|
| 1      | 8.169         | BV E | 0.2588      | 19.85062     | 1.10901      | 1.3746  |
| 2      | 8.583         | VB R | 0.2743      | 1424.21106   | 80.52248     | 98.6254 |

# Copies of $^1\text{H}$ NMR, $^{13}\text{C}$ NMR and $^{19}\text{F}$ NMR spectra

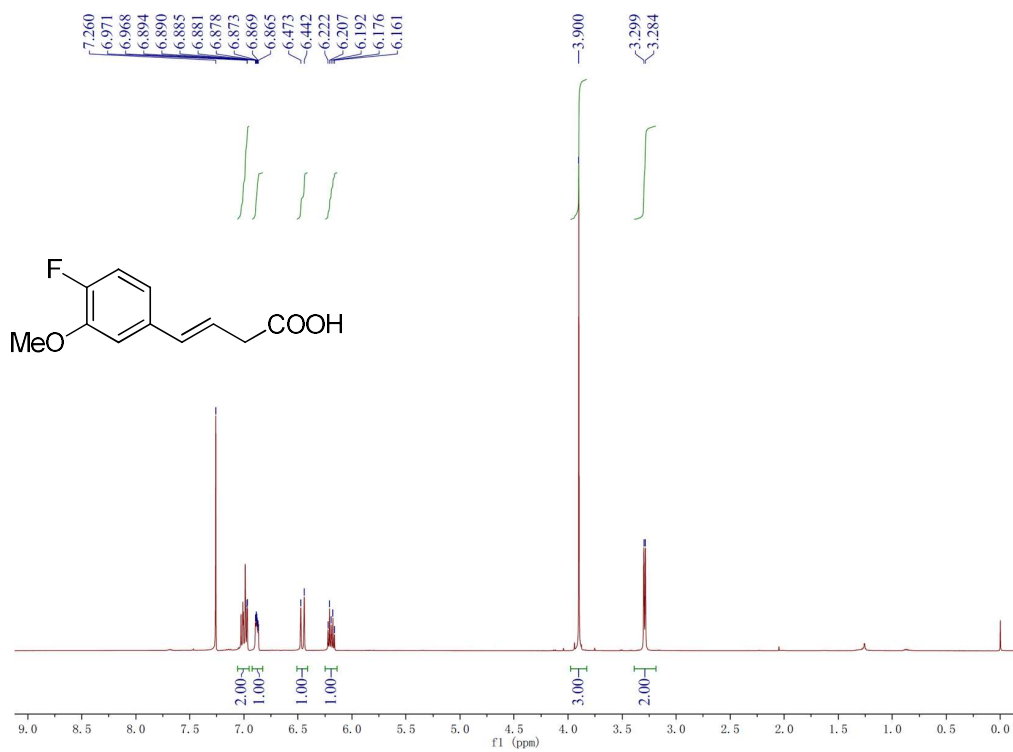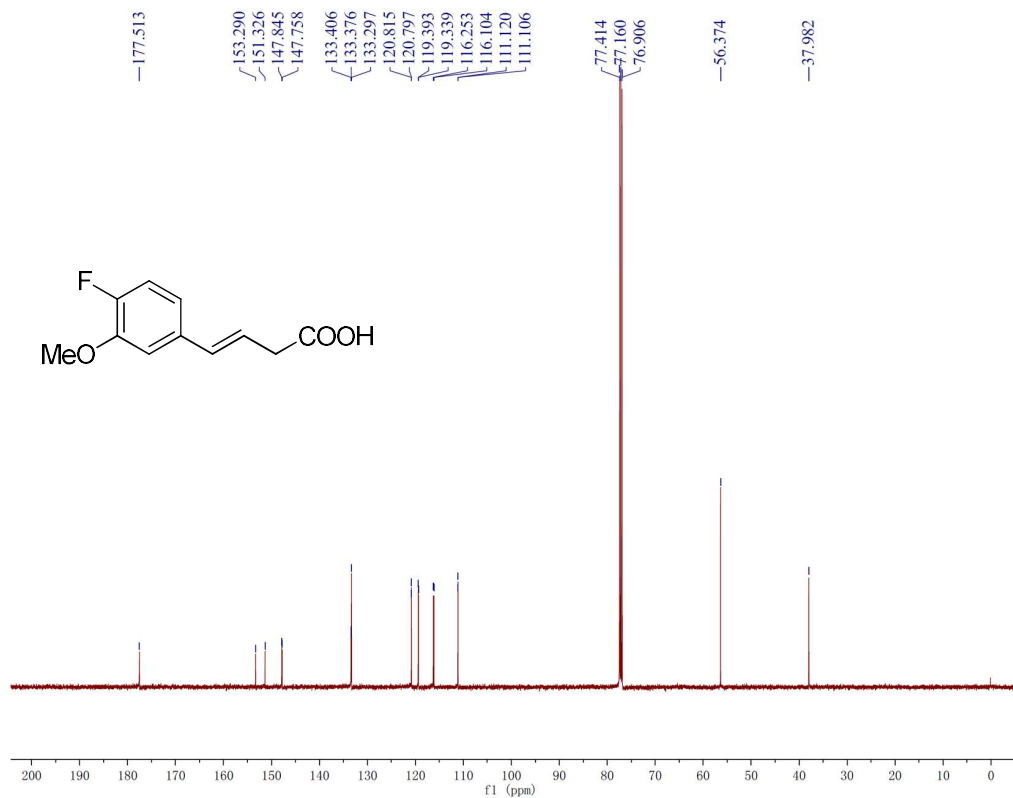

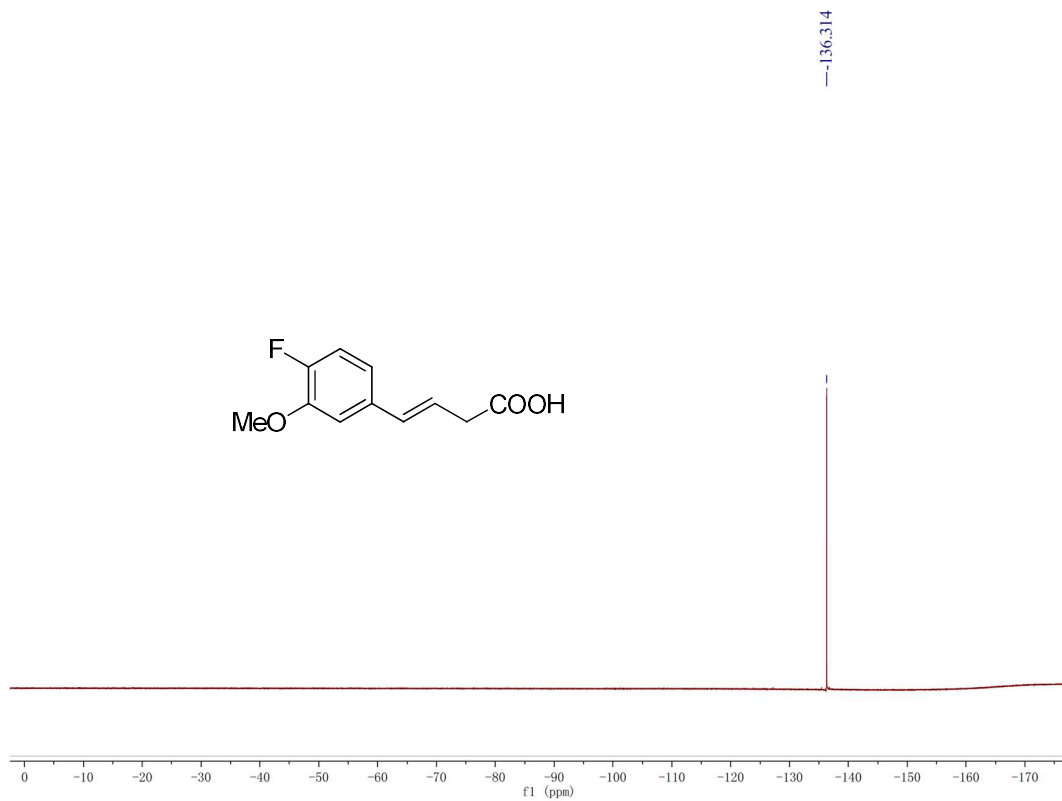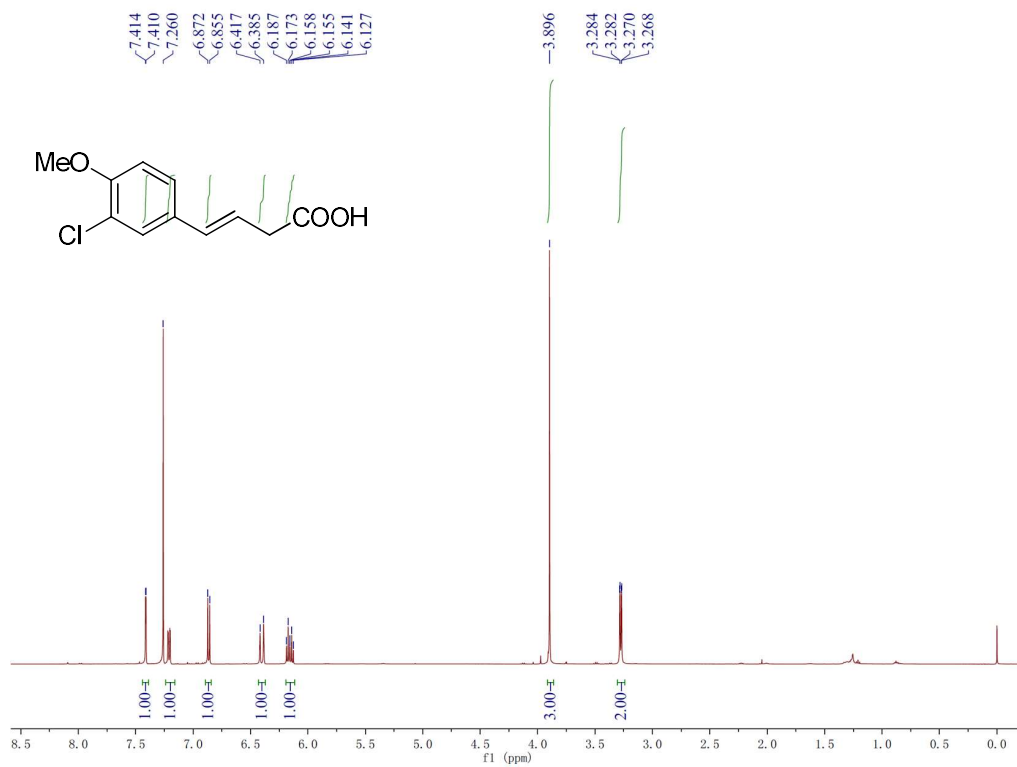

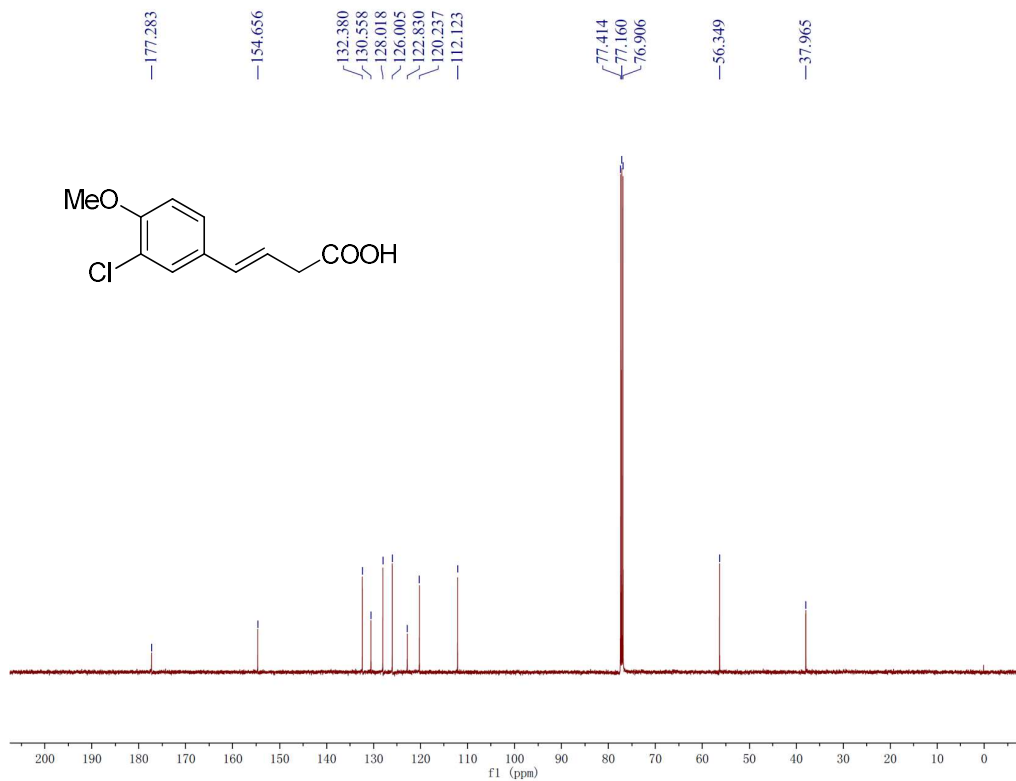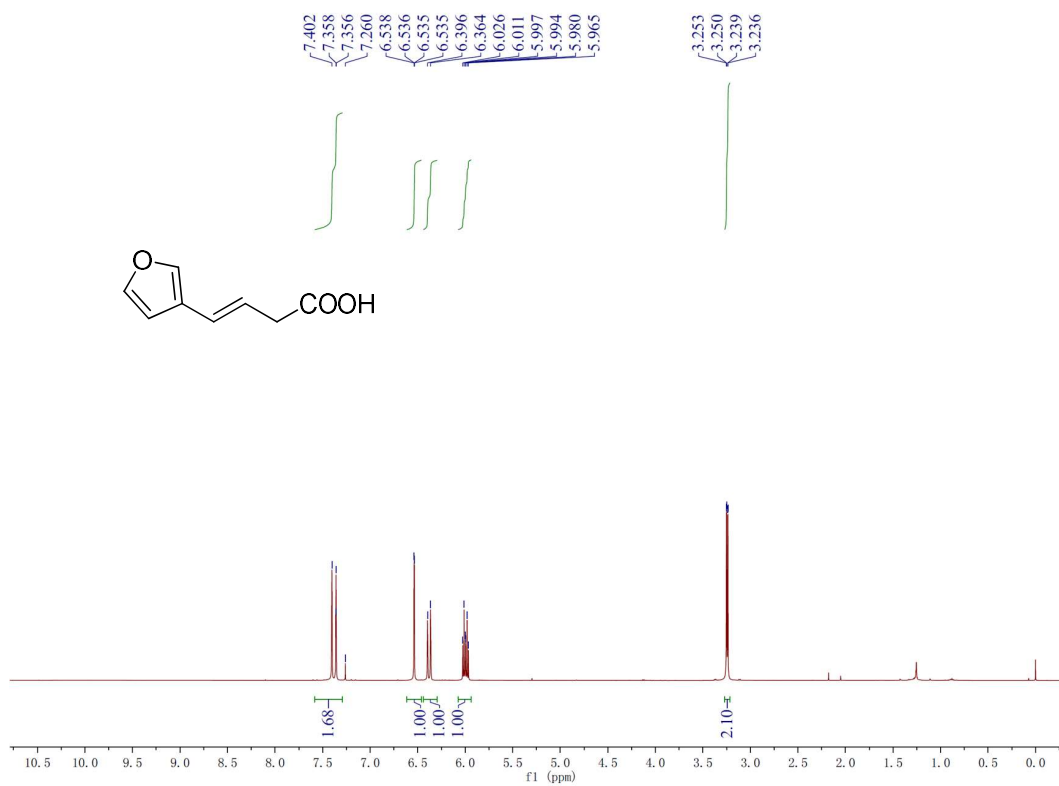

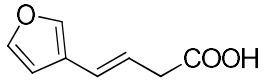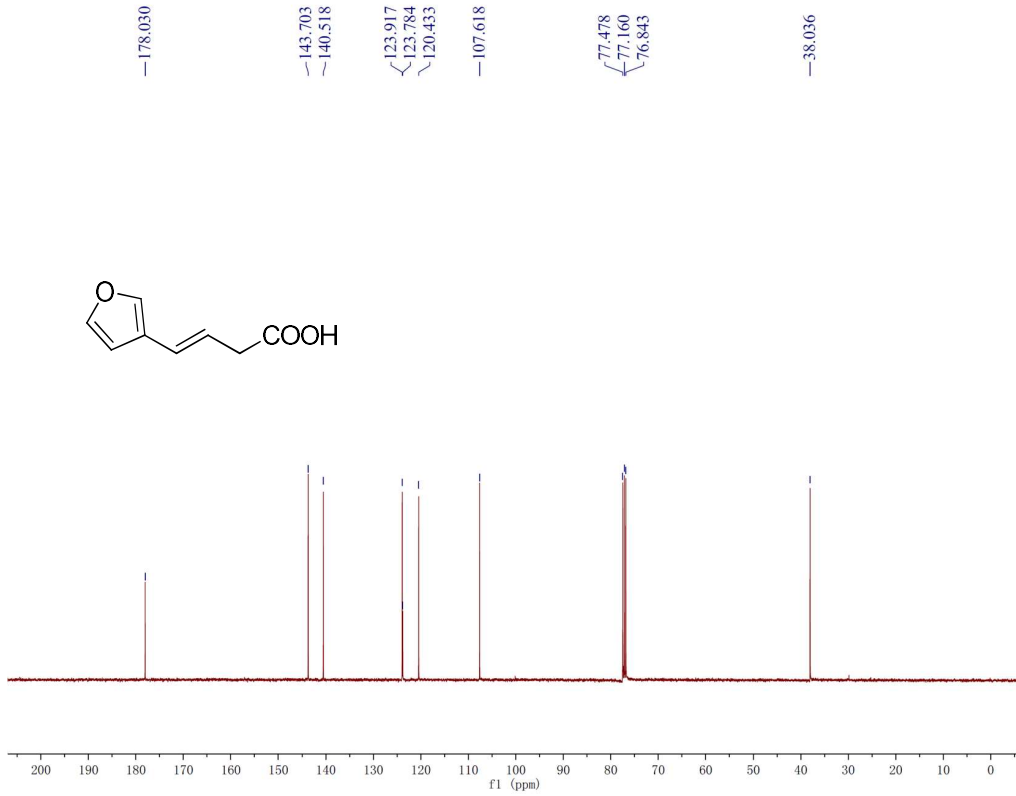

7.440  
7.432  
7.429  
7.426  
7.423  
7.419  
7.416  
7.405  
7.391  
7.381  
7.374  
7.361  
7.358  
7.354  
7.350  
7.341  
7.294  
7.288  
7.284  
7.280  
7.275  
7.271  
5.376  
5.362  
3.847  
3.844  
3.832  
3.830  
3.829  
3.059  
3.034  
3.014  
2.708  
2.690  
2.663  
2.645

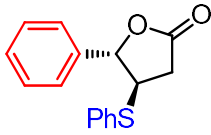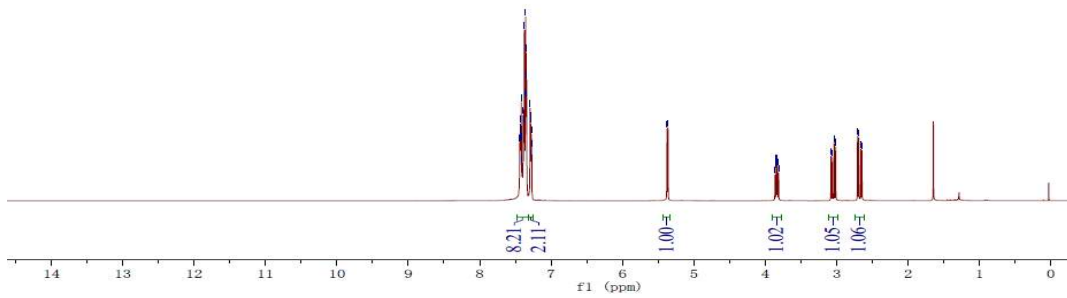

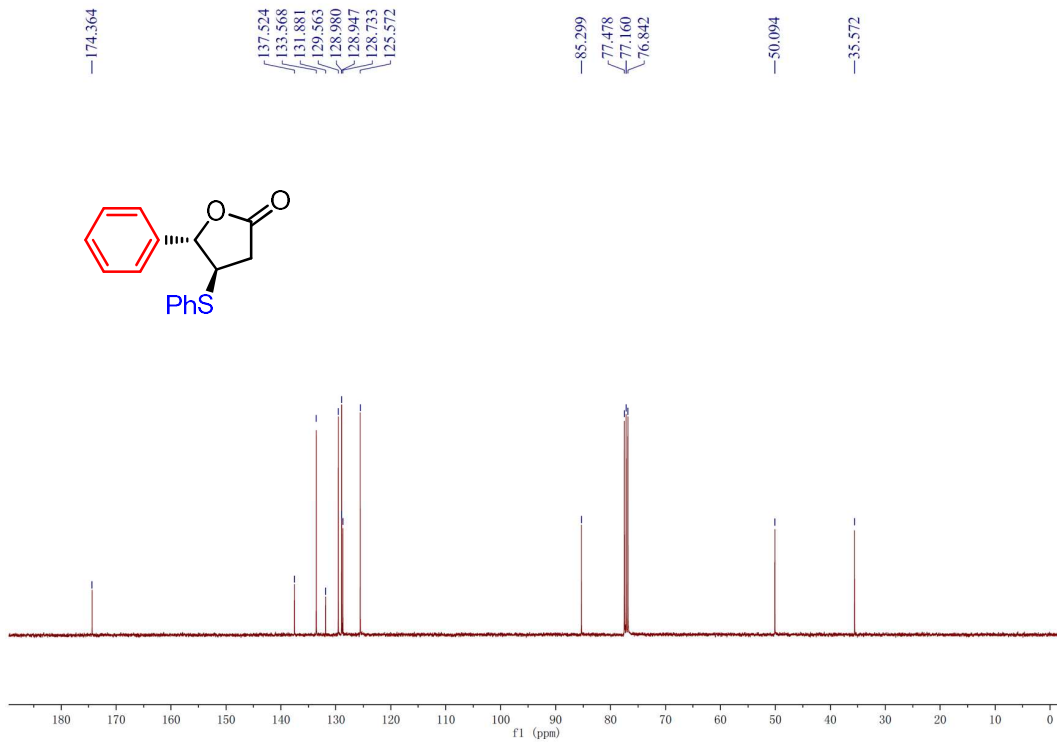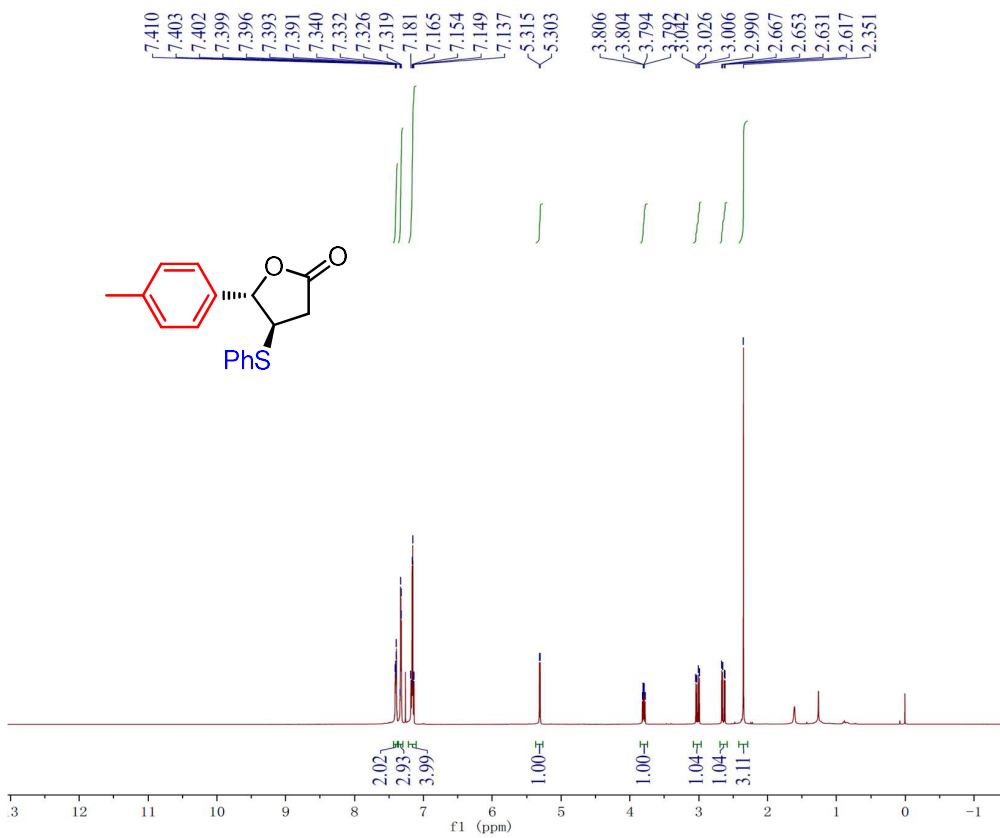



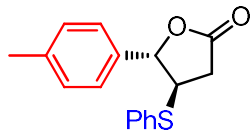

174.460  
 138.939  
 134.494  
 133.558  
 131.943  
 129.613  
 129.548  
 128.677  
 125.598  
 85.337  
 77.414  
 77.160  
 76.906  
 50.060  
 35.686  
 21.300

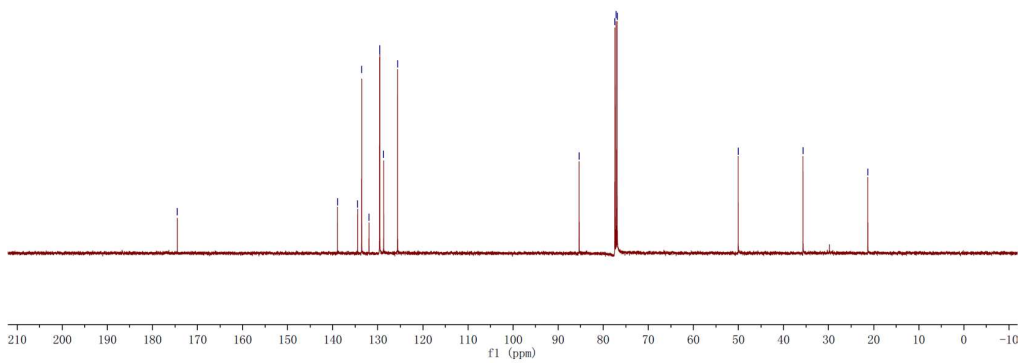

7.454  
 7.447  
 7.444  
 7.440  
 7.435  
 7.430  
 7.427  
 7.370  
 7.365  
 7.358  
 7.352  
 7.344  
 7.311  
 7.295  
 7.284  
 7.279  
 6.899  
 6.894  
 6.882  
 6.878  
 6.867  
 6.851  
 6.775  
 6.771  
 5.350  
 5.339  
 3.843  
 3.829  
 3.827  
 3.809  
 3.807  
 3.050  
 3.030  
 3.014  
 2.685  
 2.671  
 2.648  
 2.635

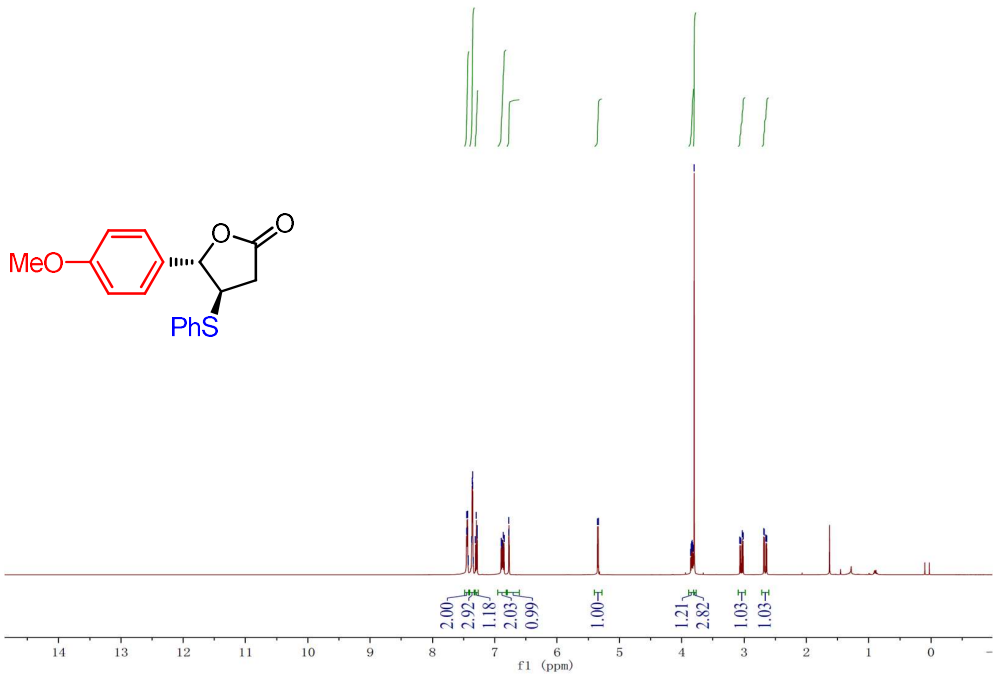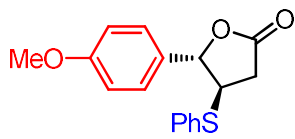

2.00  
 2.92  
 1.18  
 2.03  
 0.99  
 1.00  
 1.21  
 2.82  
 1.03  
 1.03

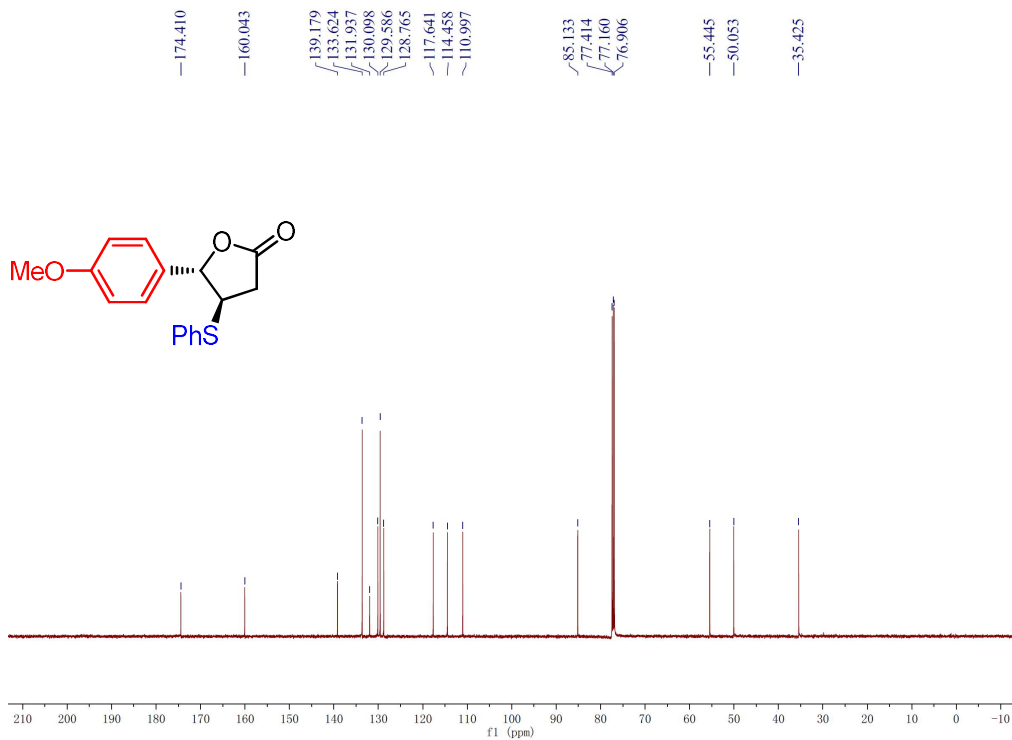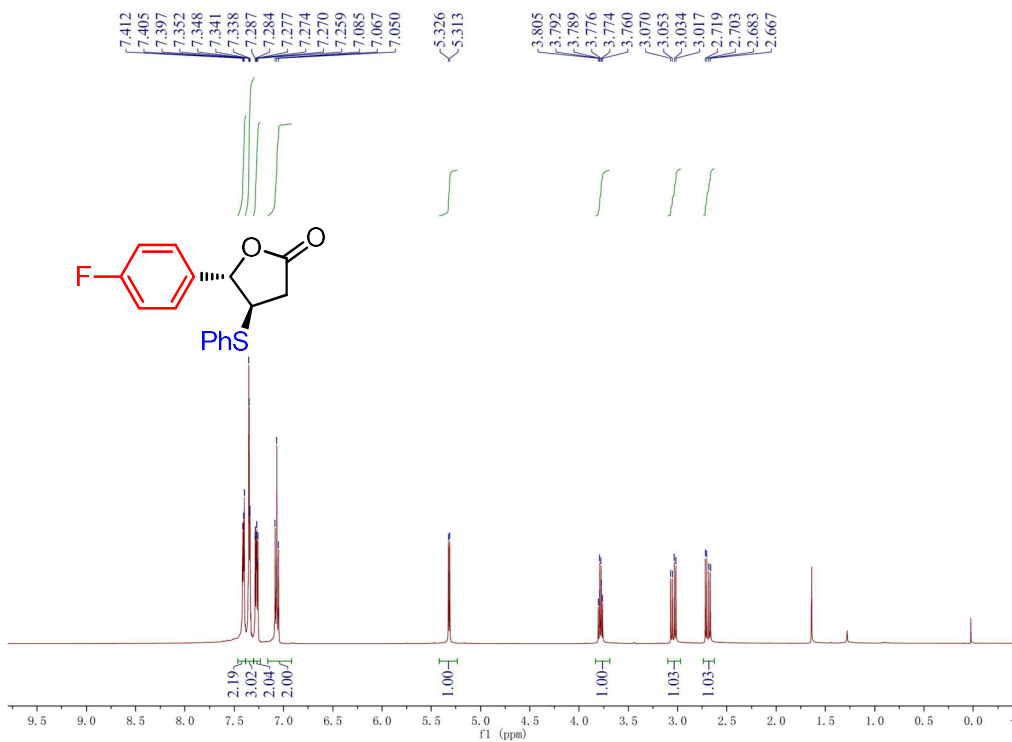

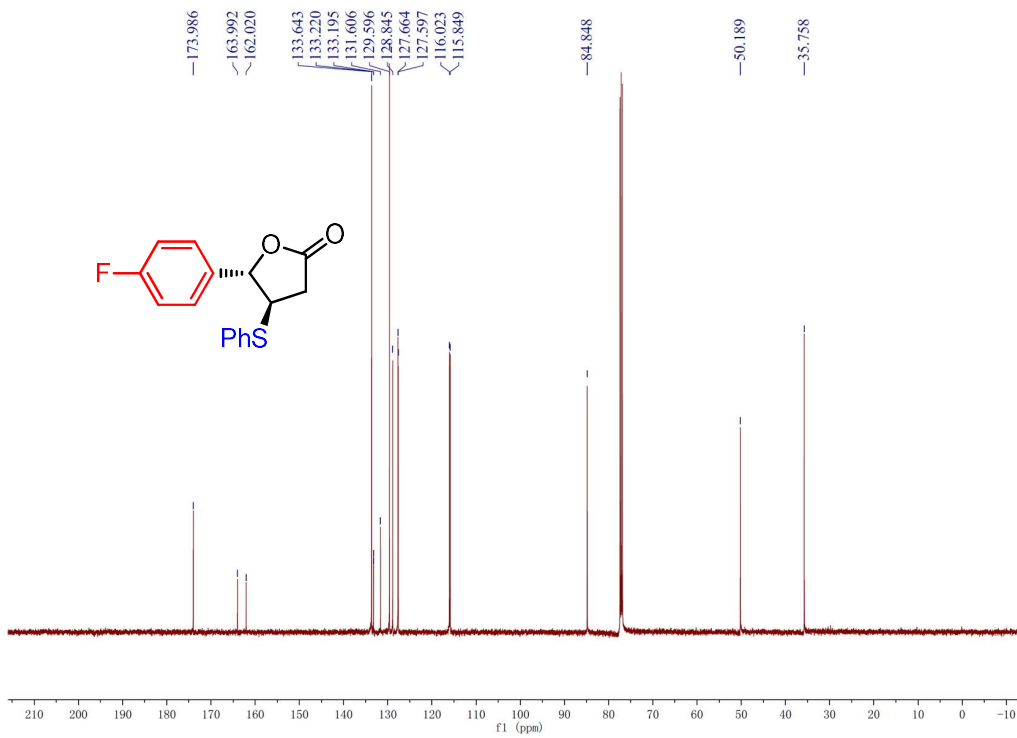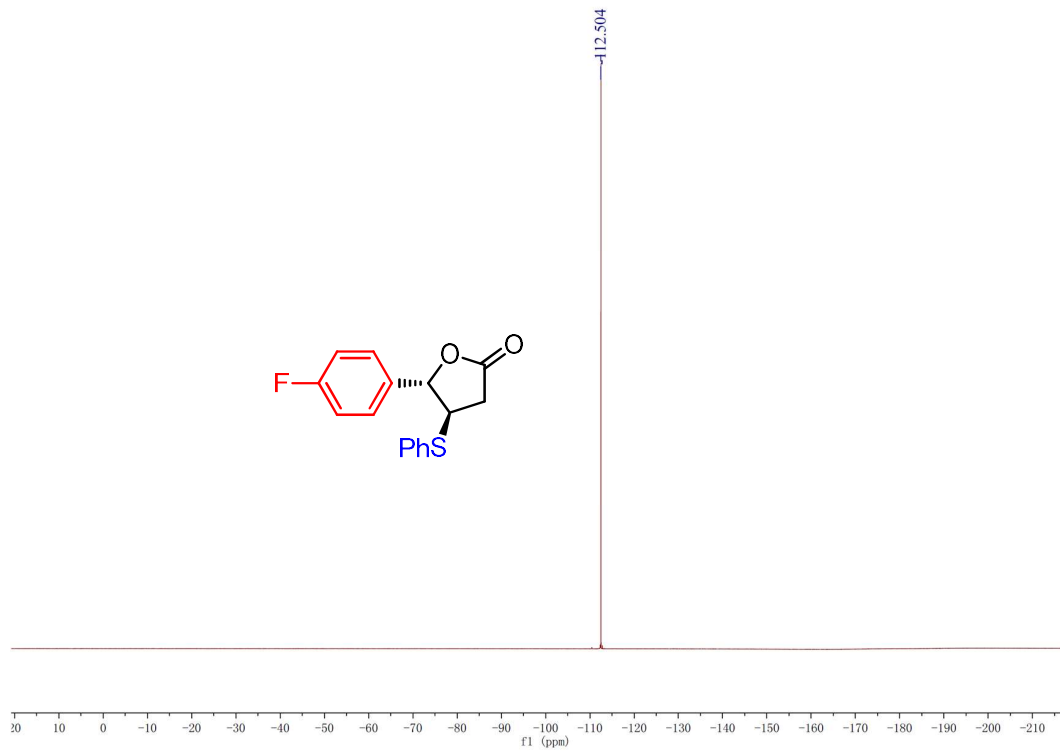

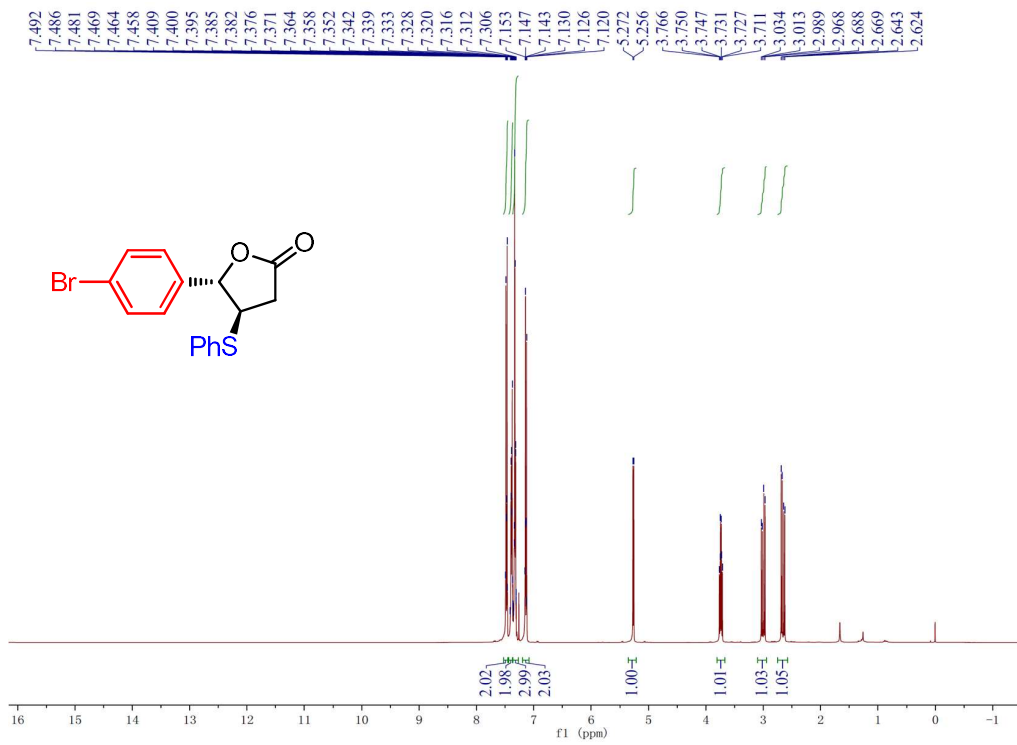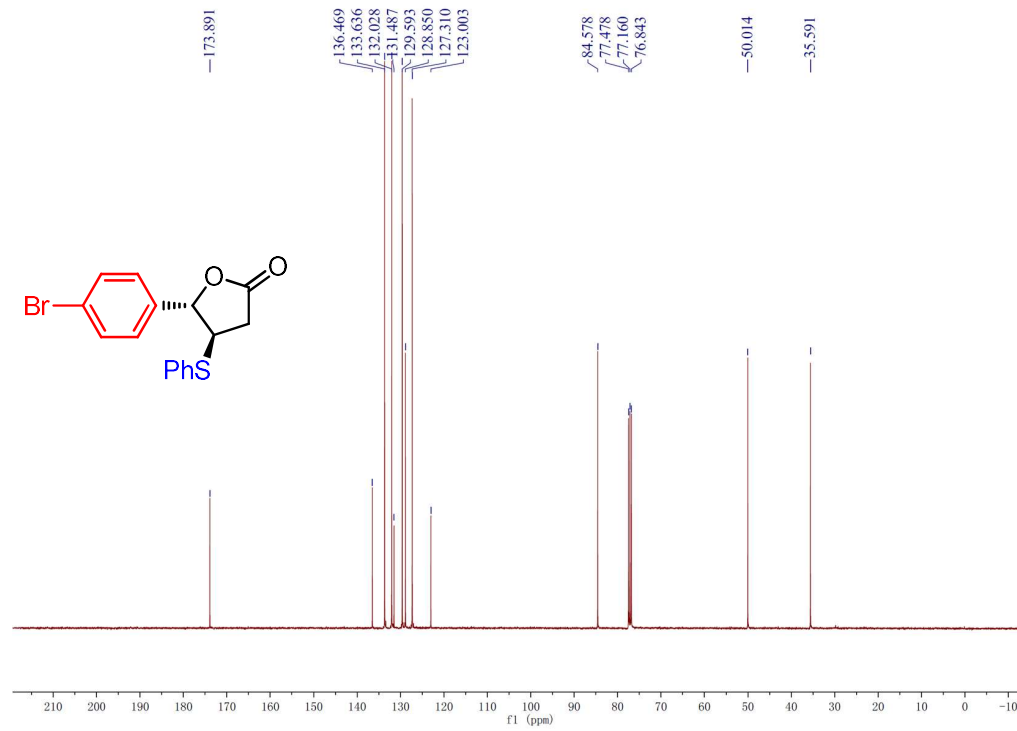

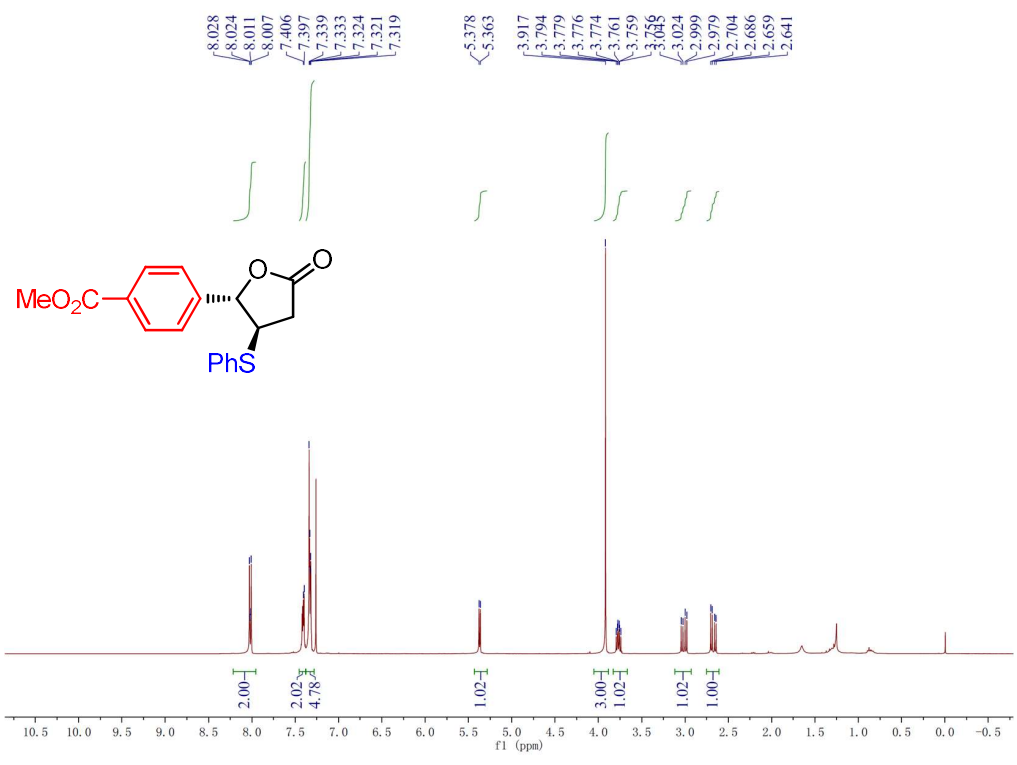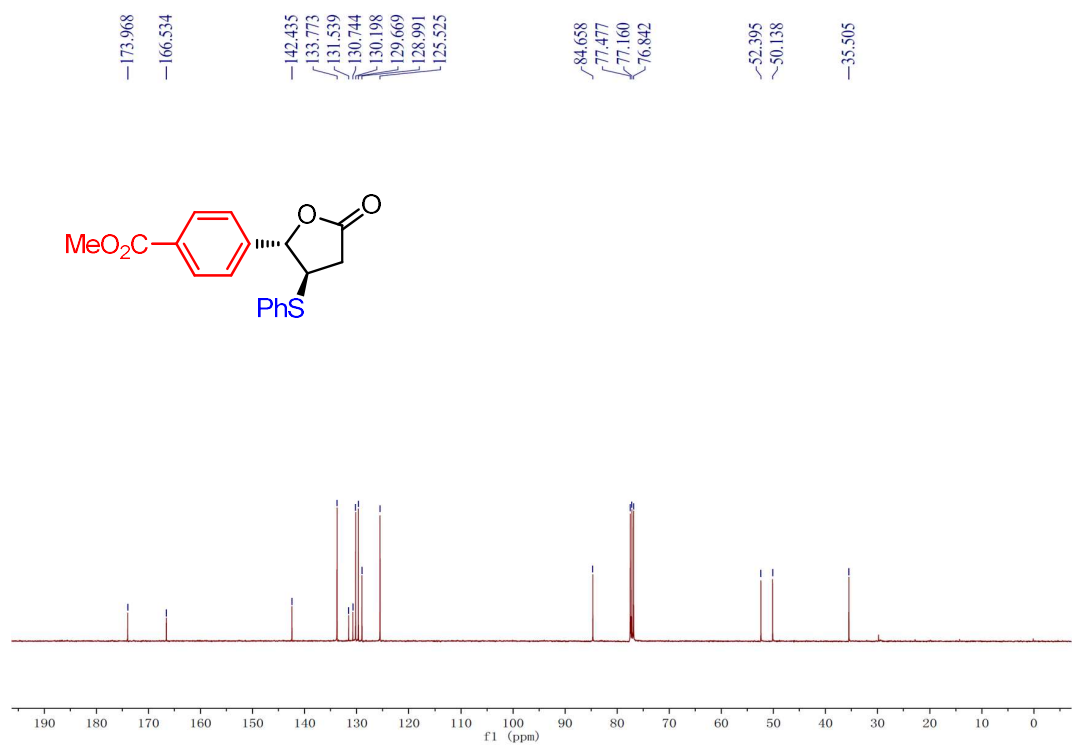

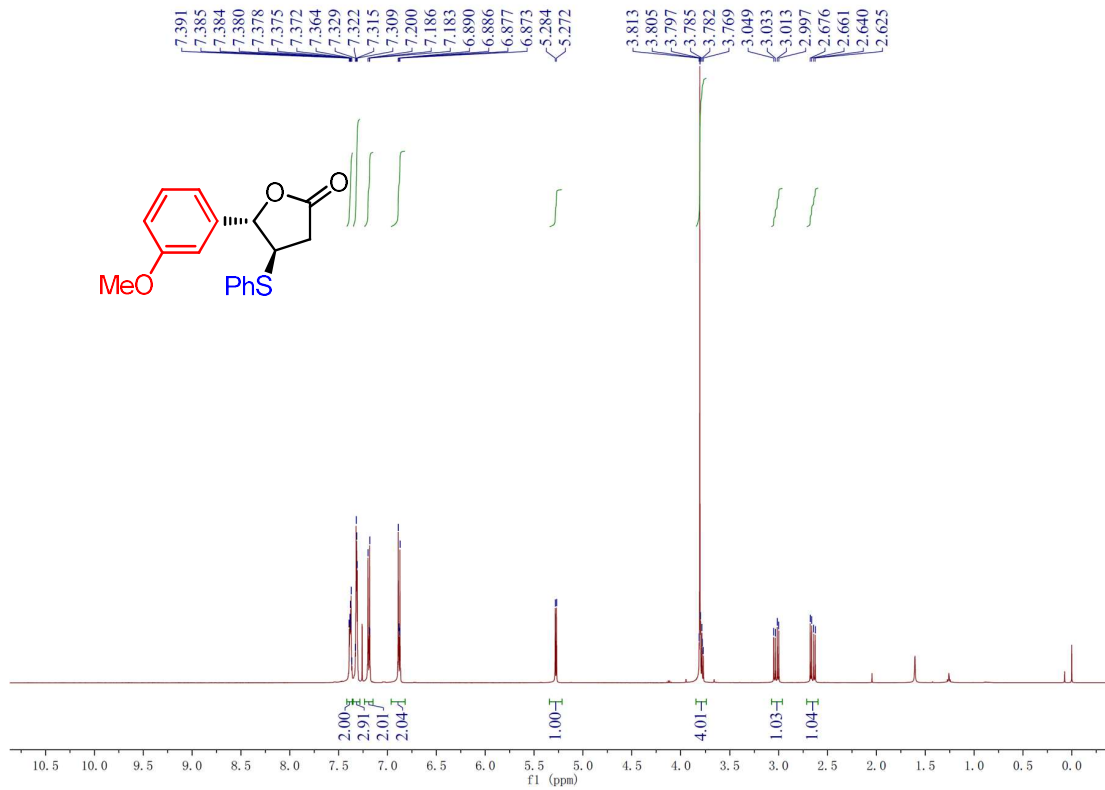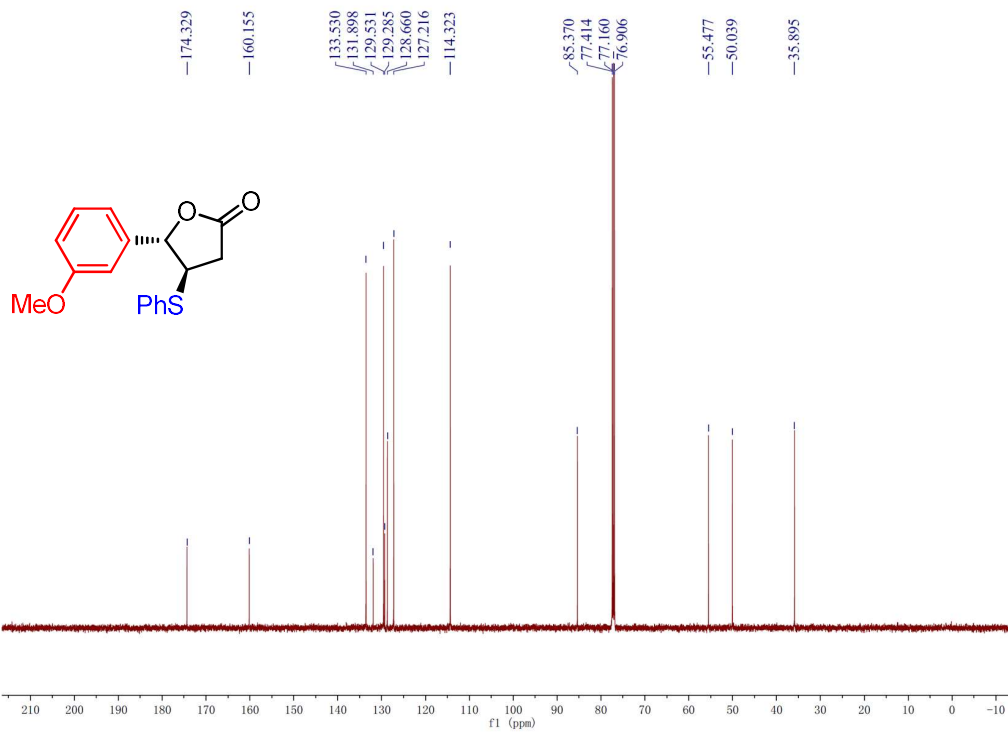

7.471  
7.466  
7.460  
7.458  
7.451  
7.381  
7.377  
7.370  
7.366  
7.363  
7.354  
7.347  
7.342  
7.336  
7.333  
7.325  
7.285  
7.278  
7.266  
7.263  
7.251  
7.247  
7.176  
7.161  
7.146  
7.102  
7.085  
7.083  
7.081  
7.064  
5.586  
5.576  
3.986  
3.975  
3.971  
3.962  
3.959  
3.946  
3.084  
3.068  
3.048  
3.032  
2.684  
2.672  
2.648  
2.636

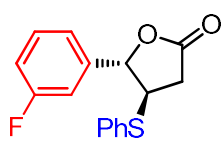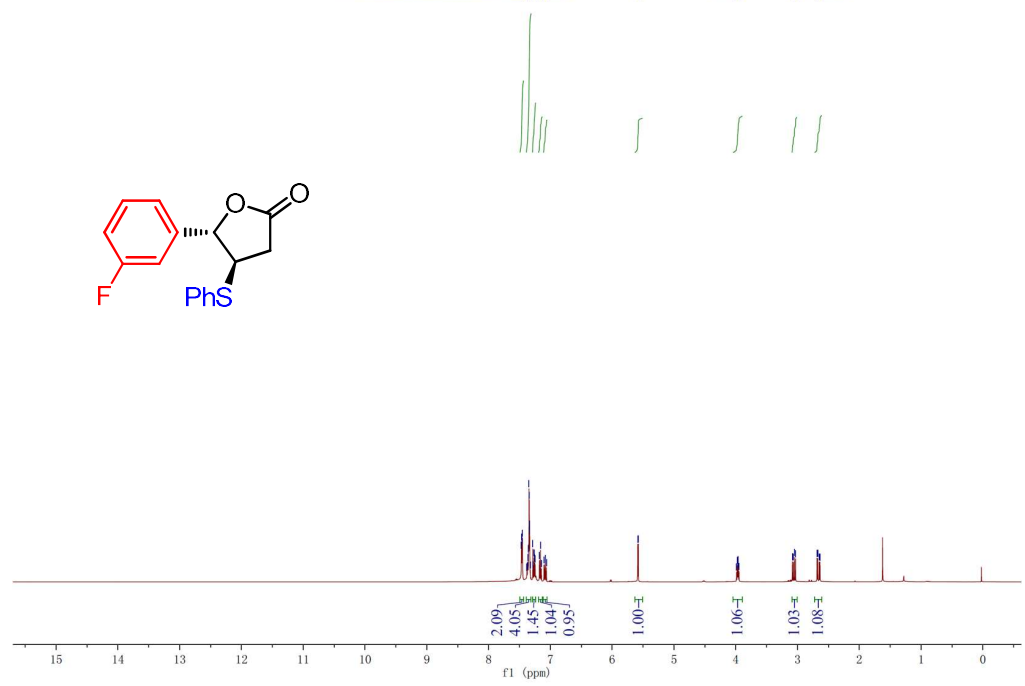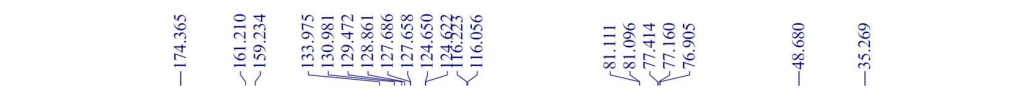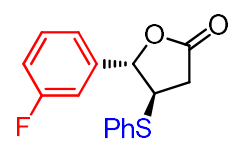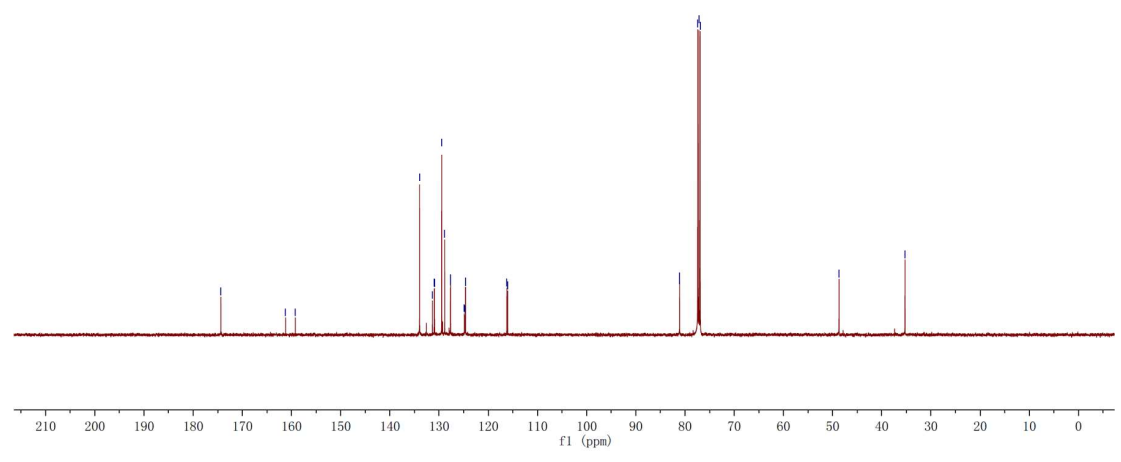

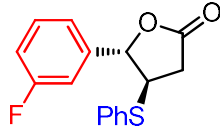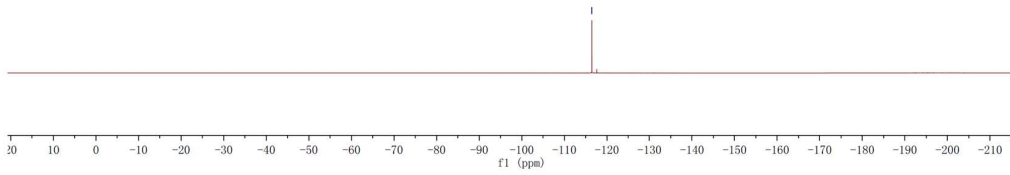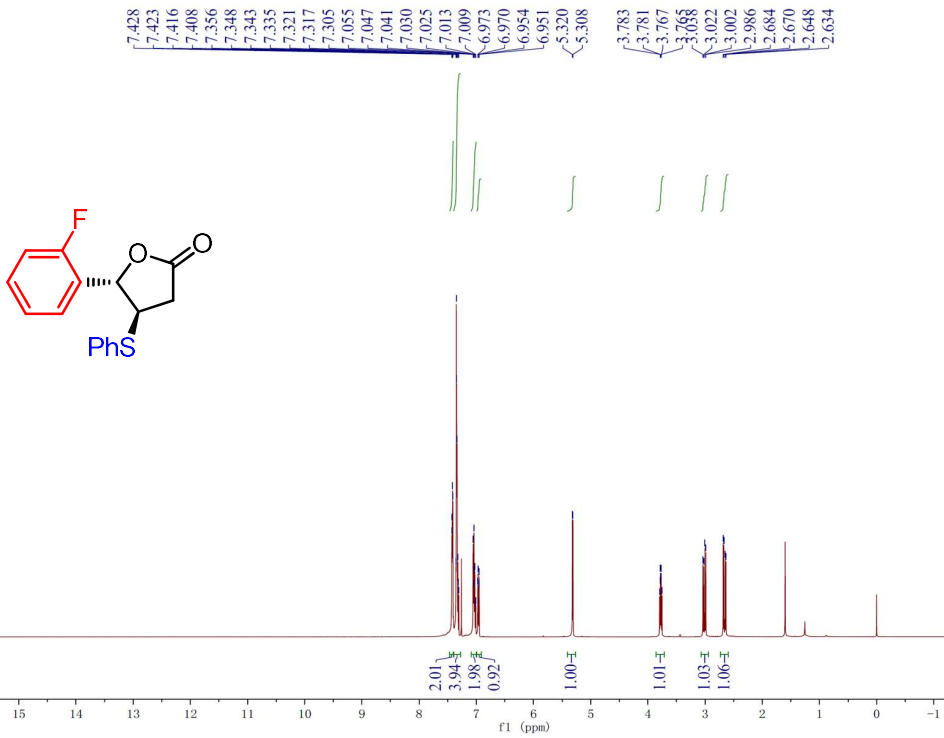



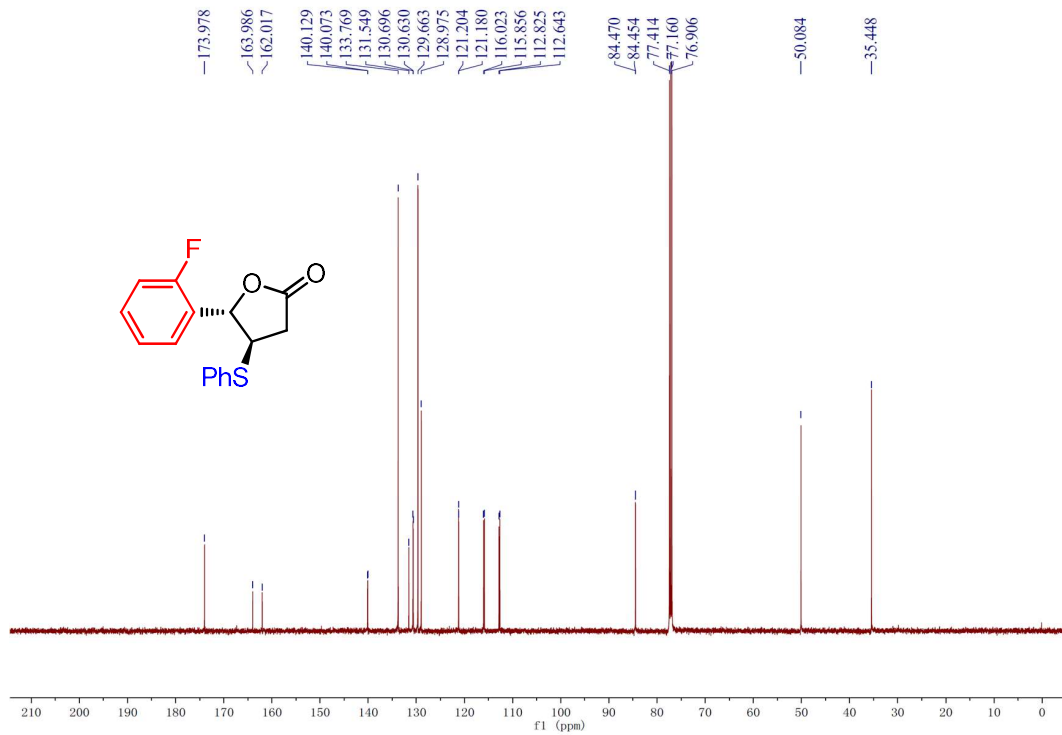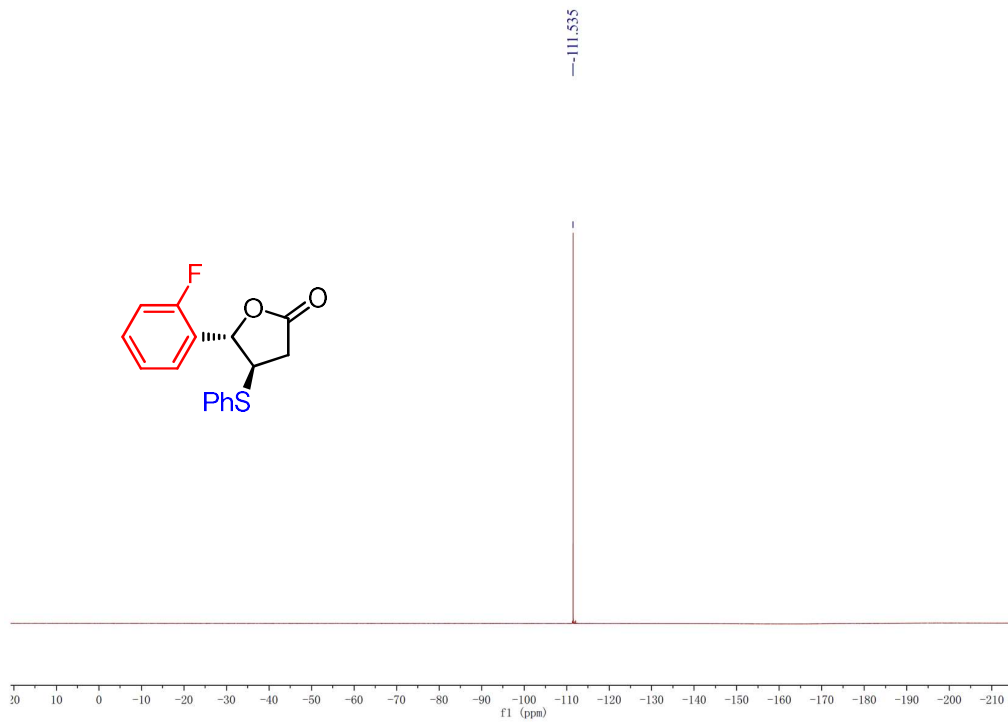

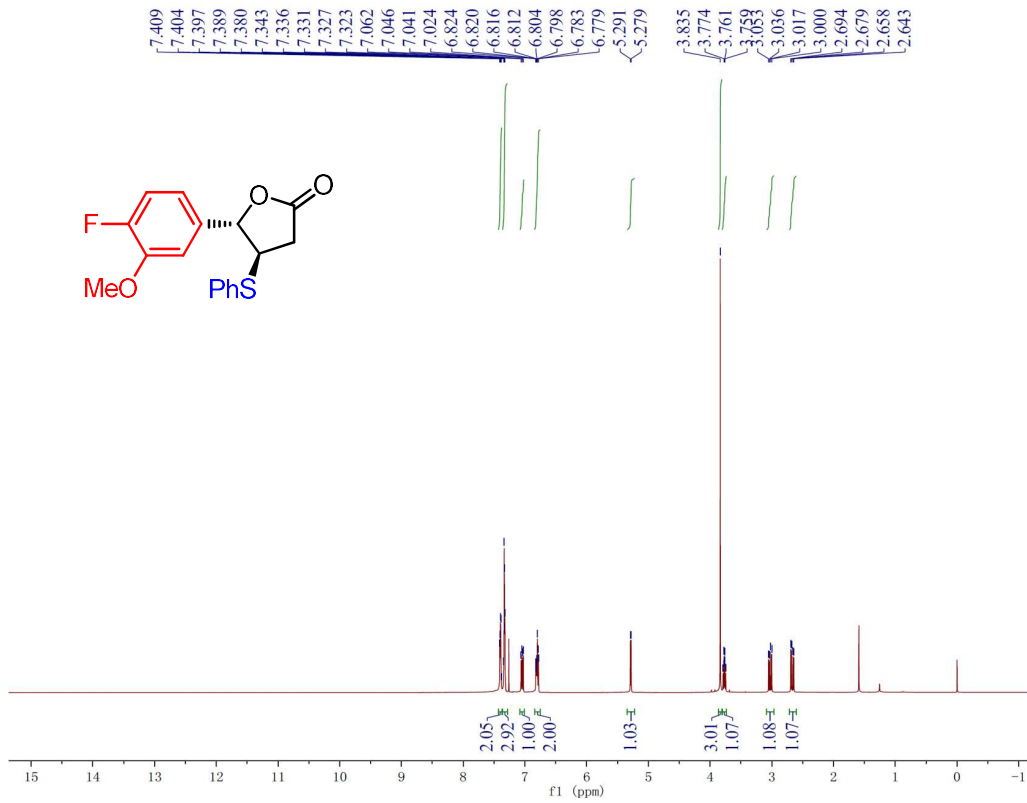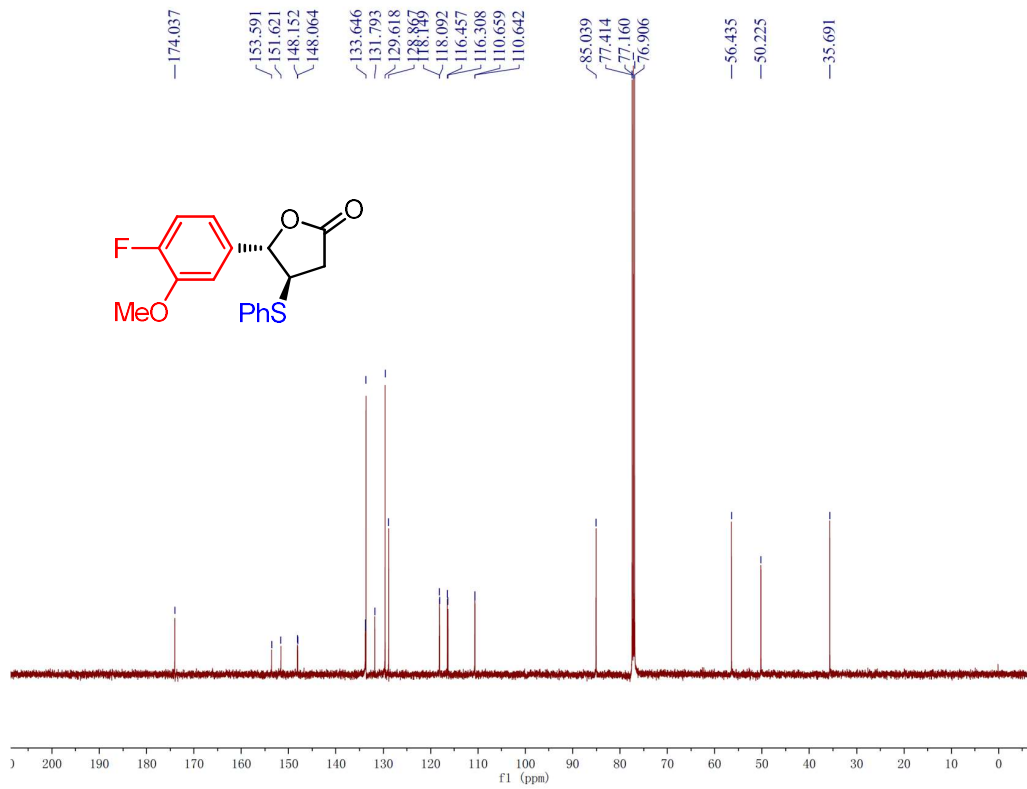

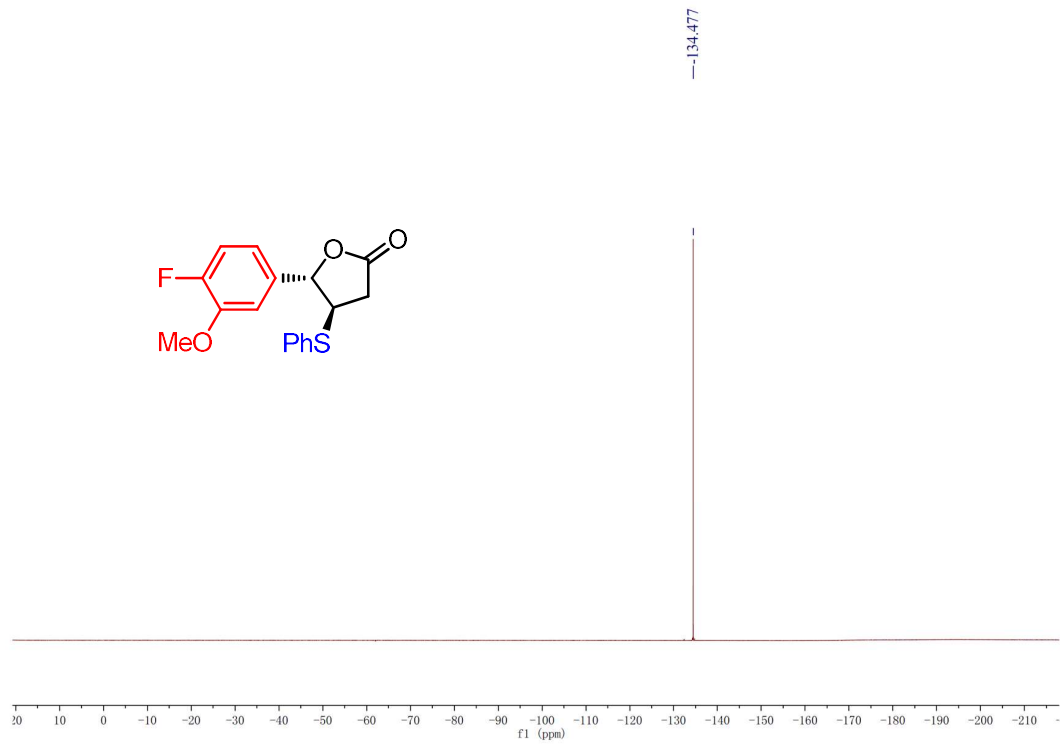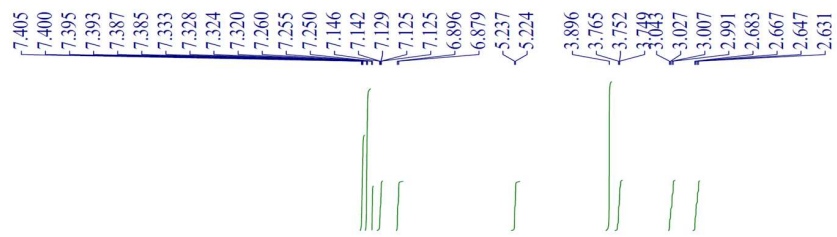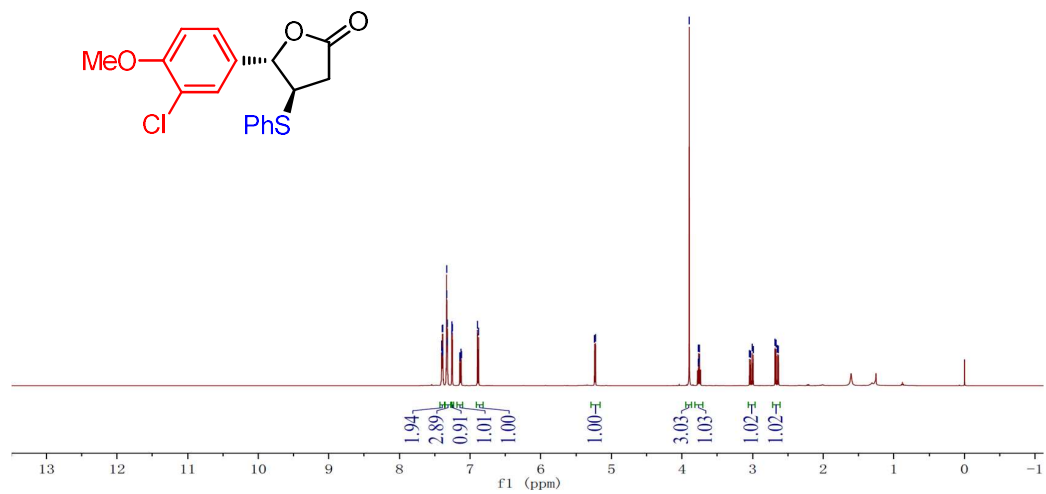

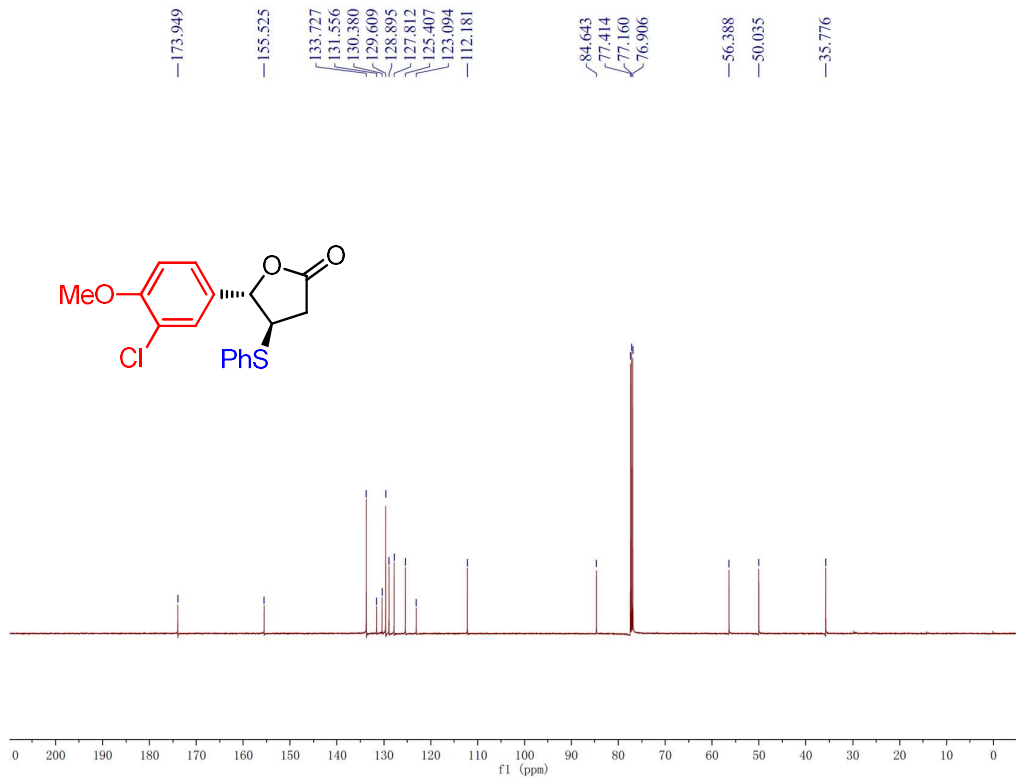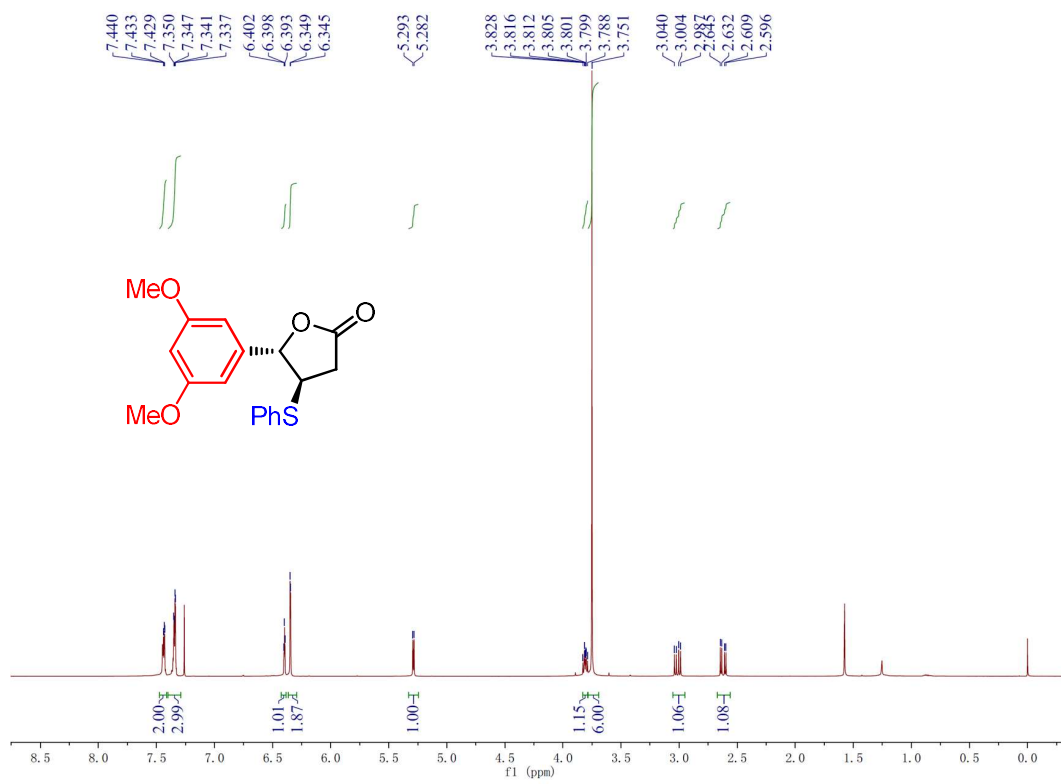

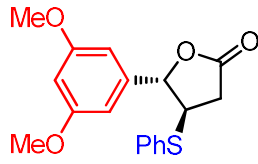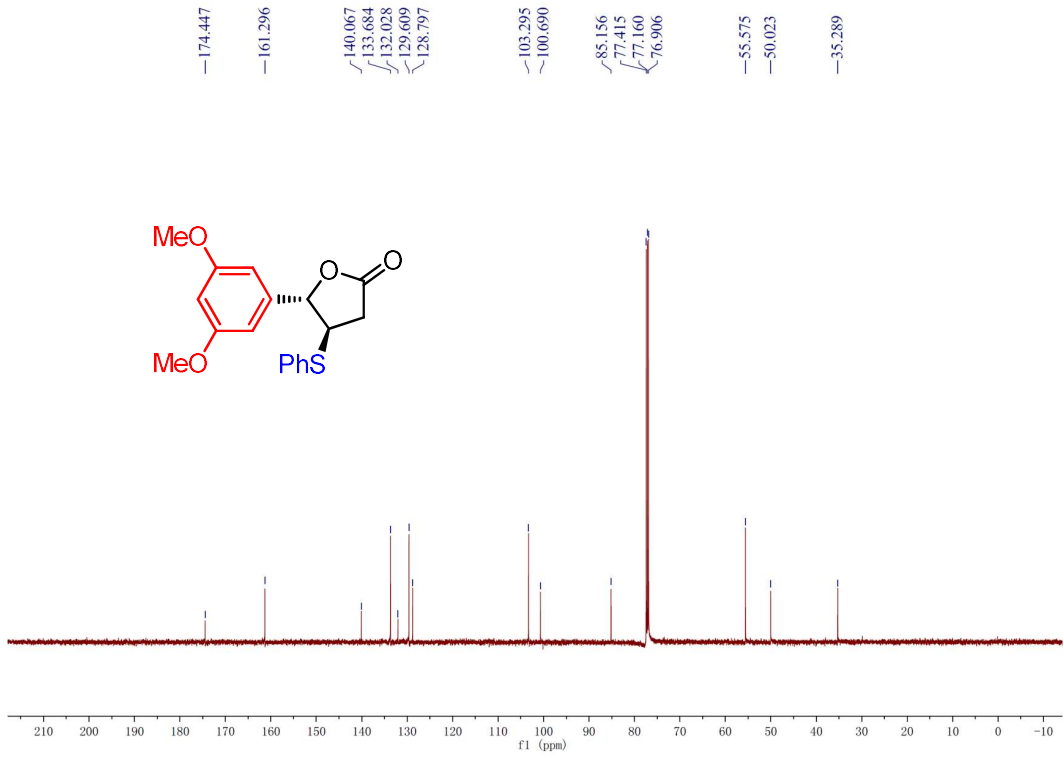

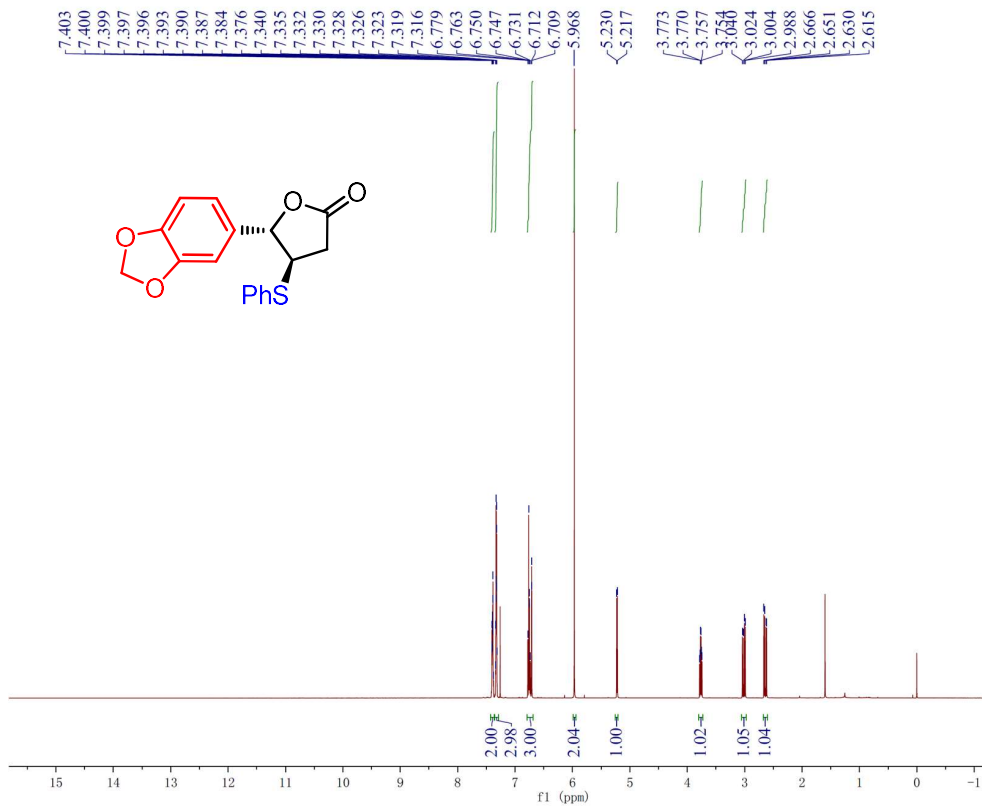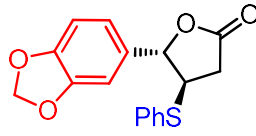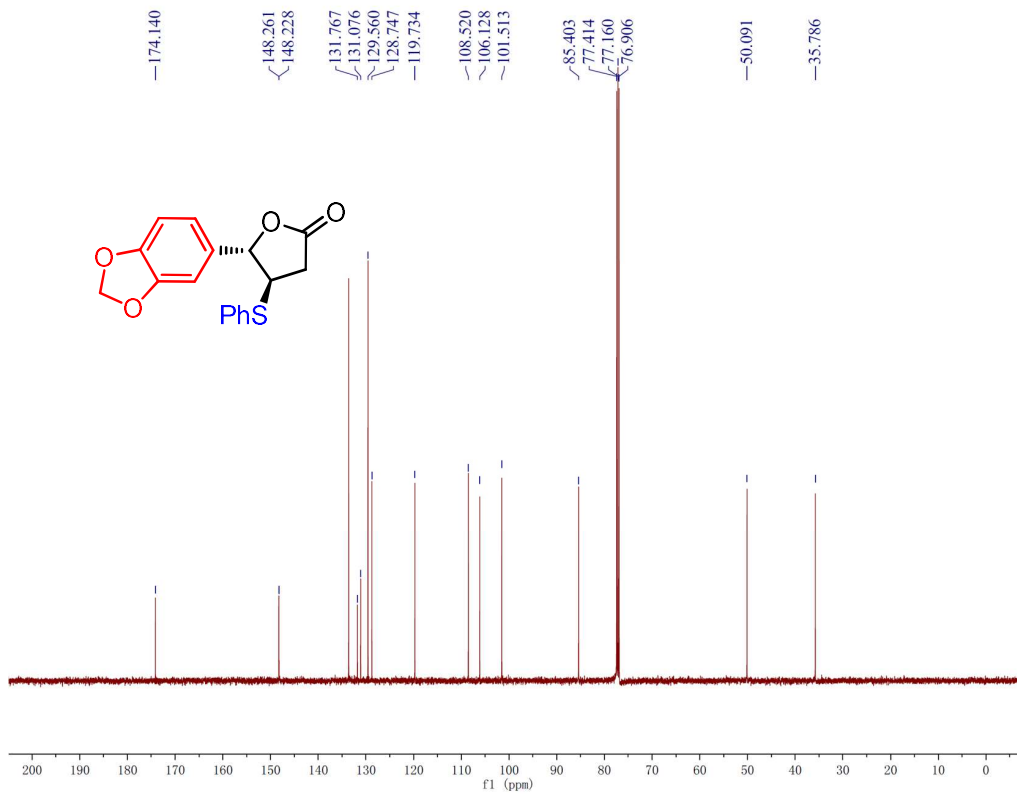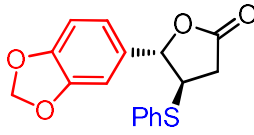

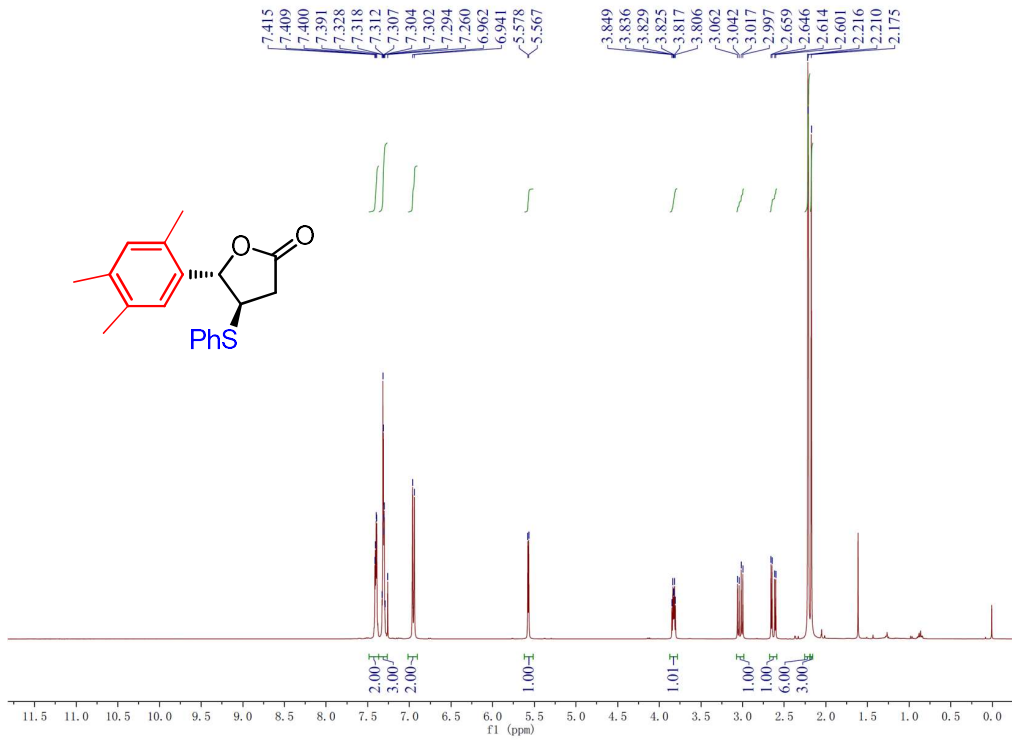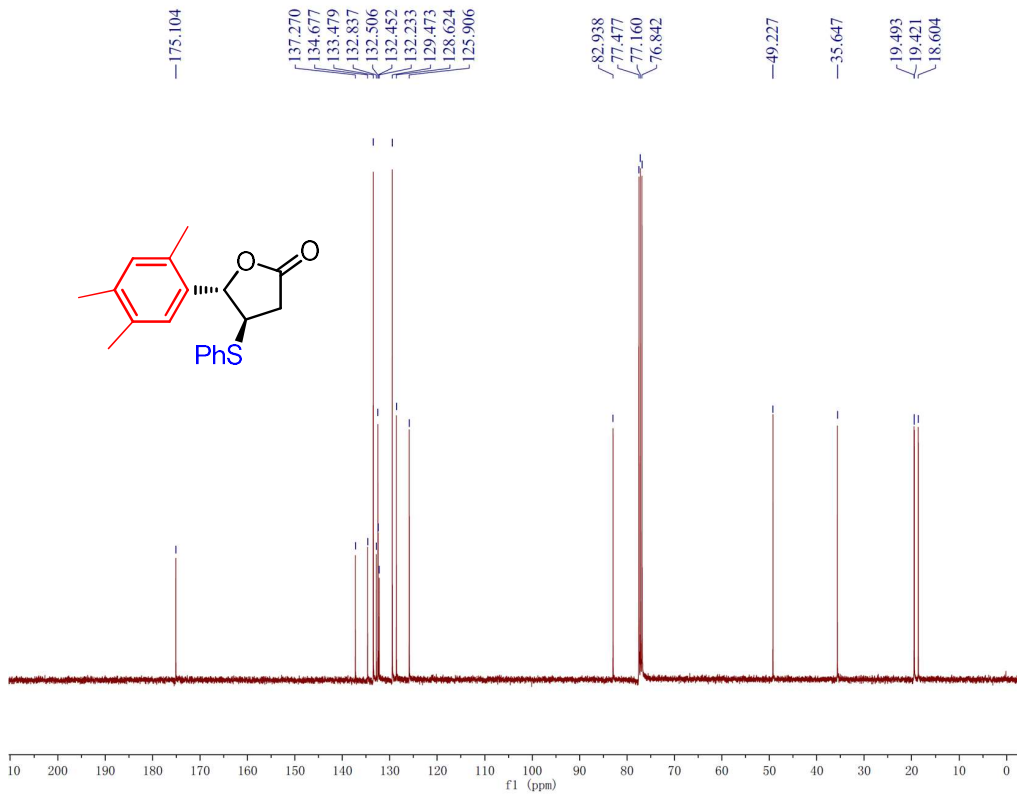

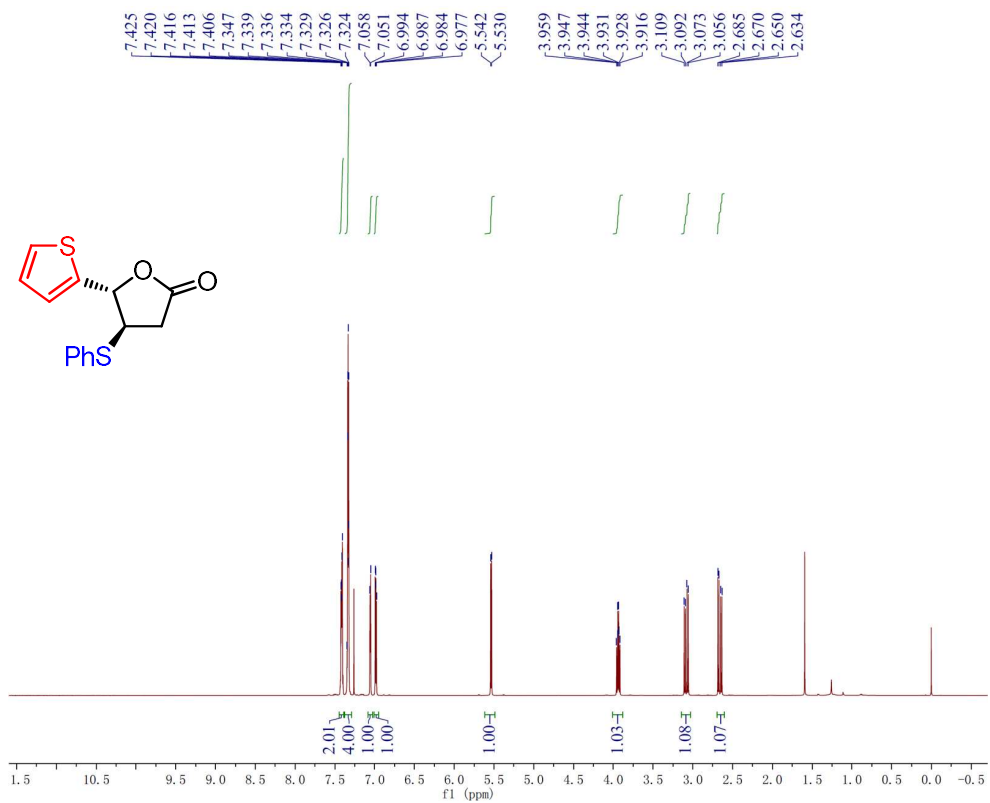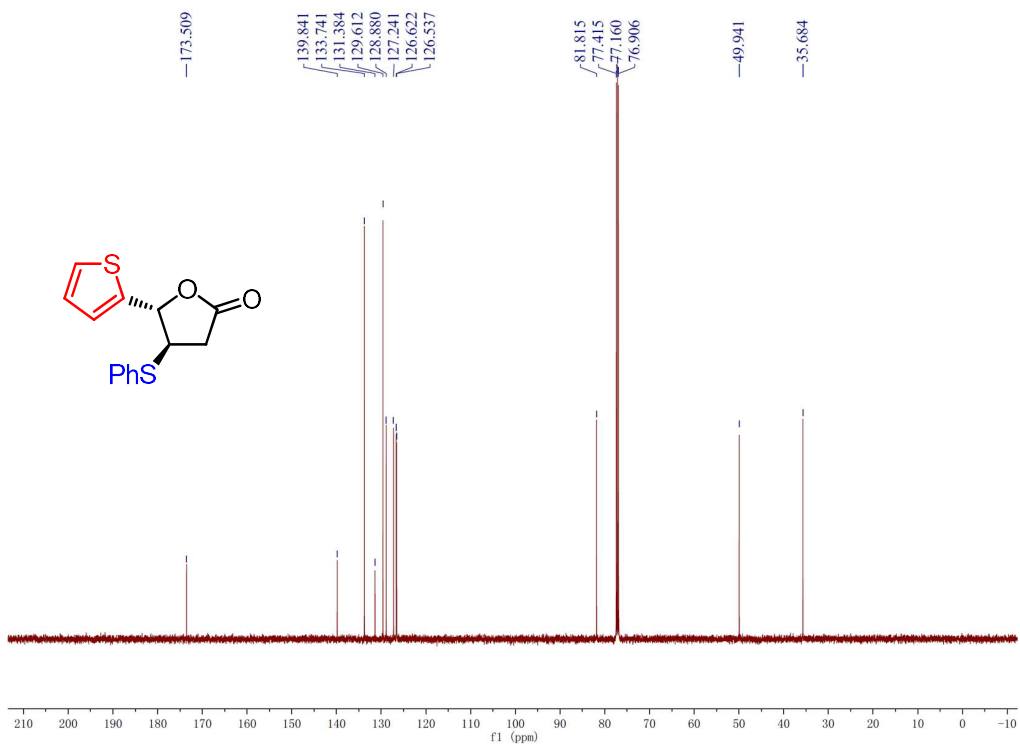



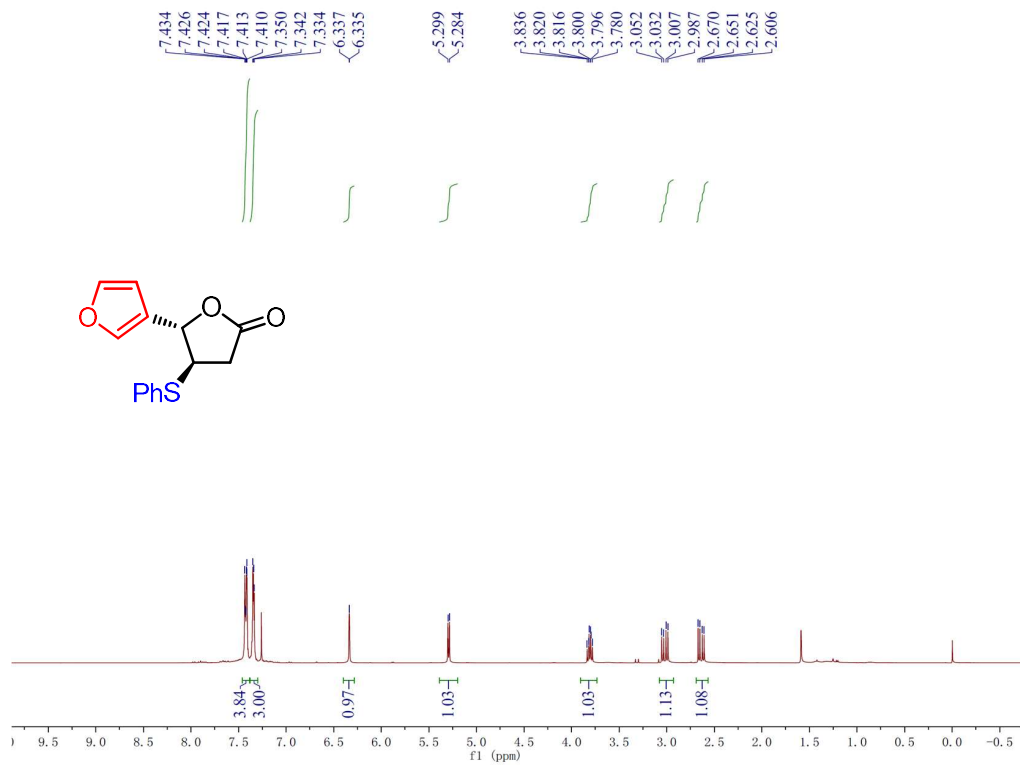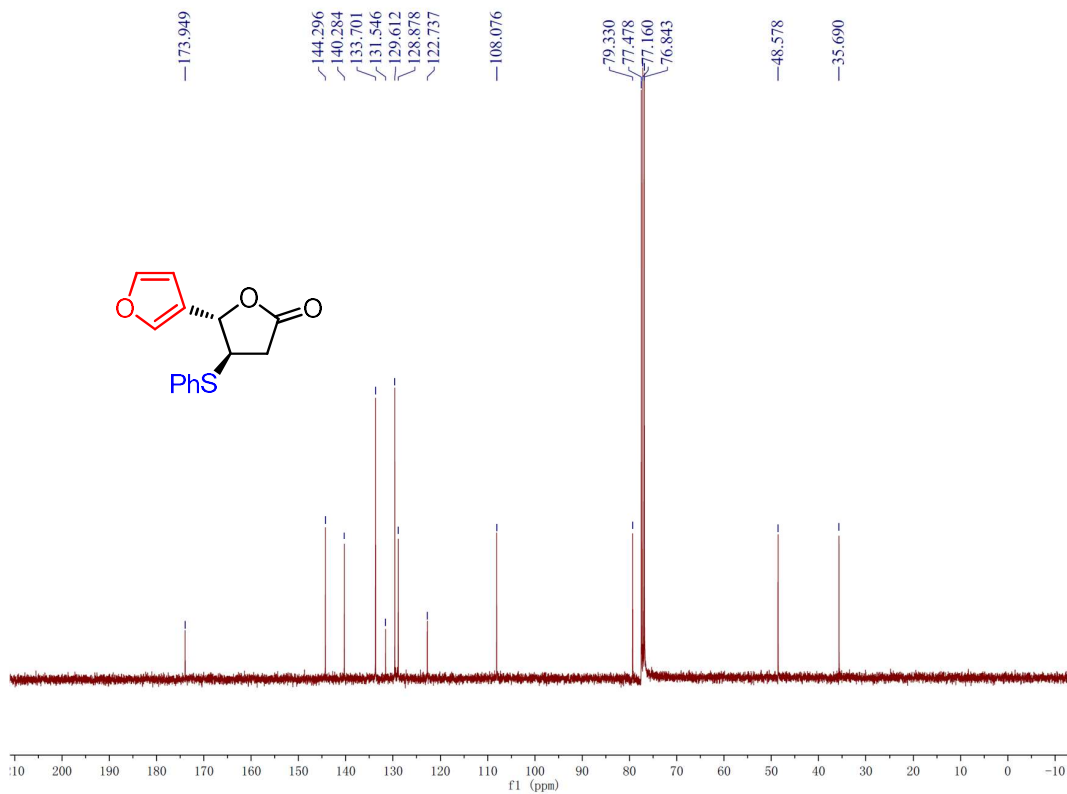

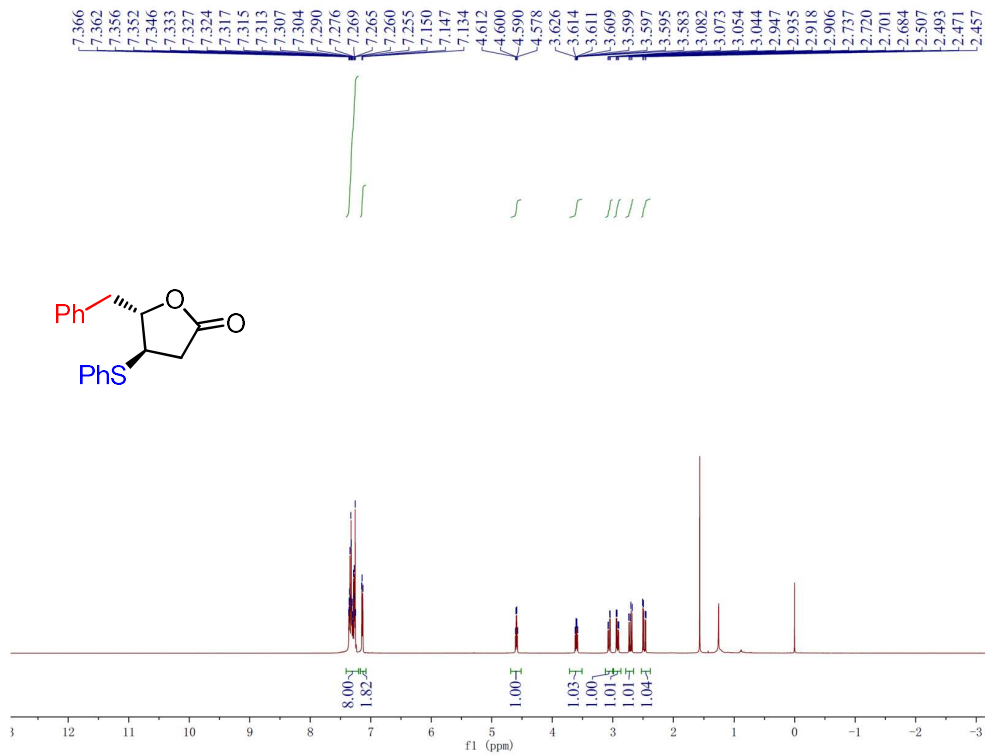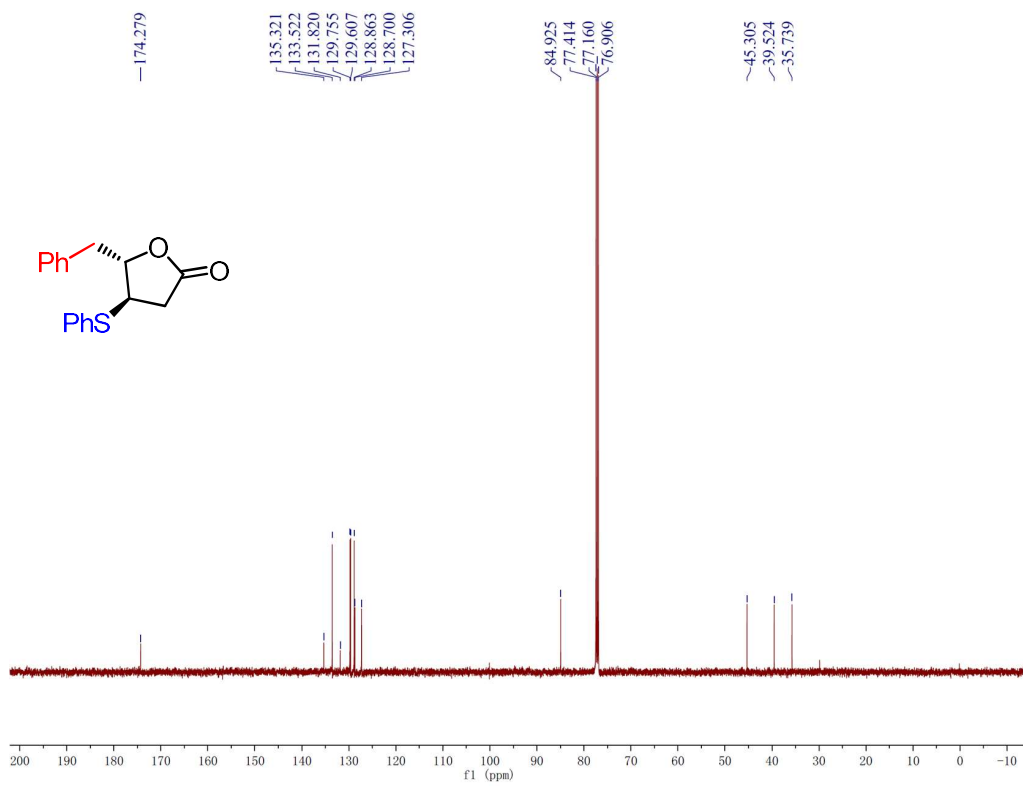

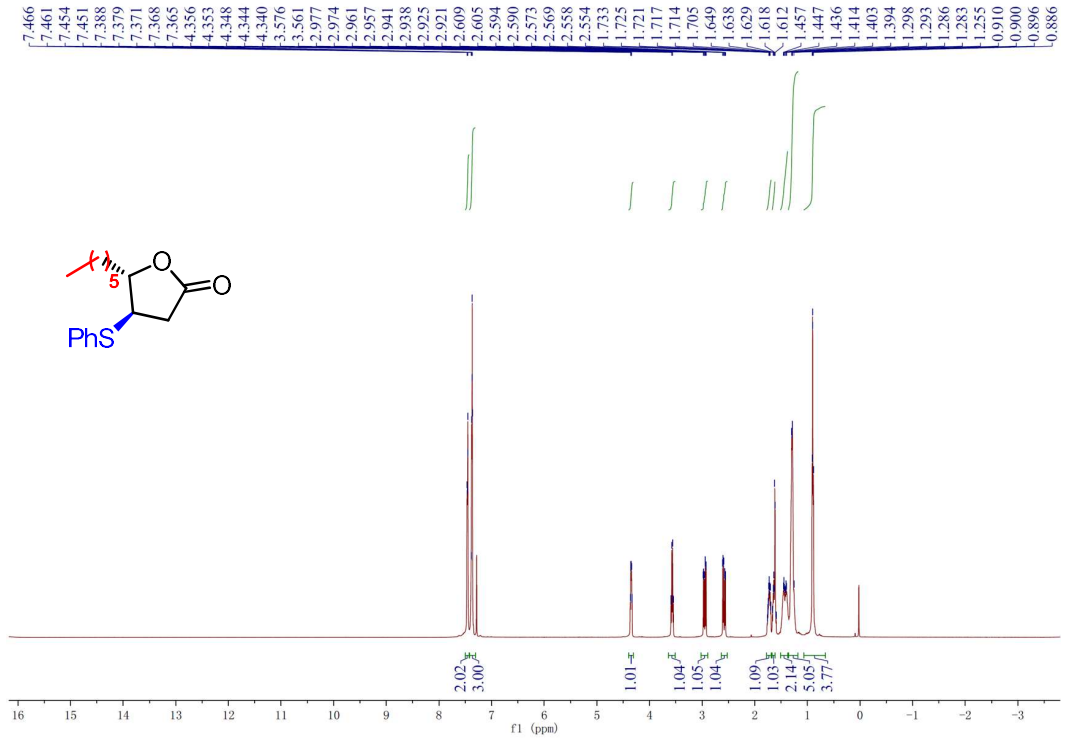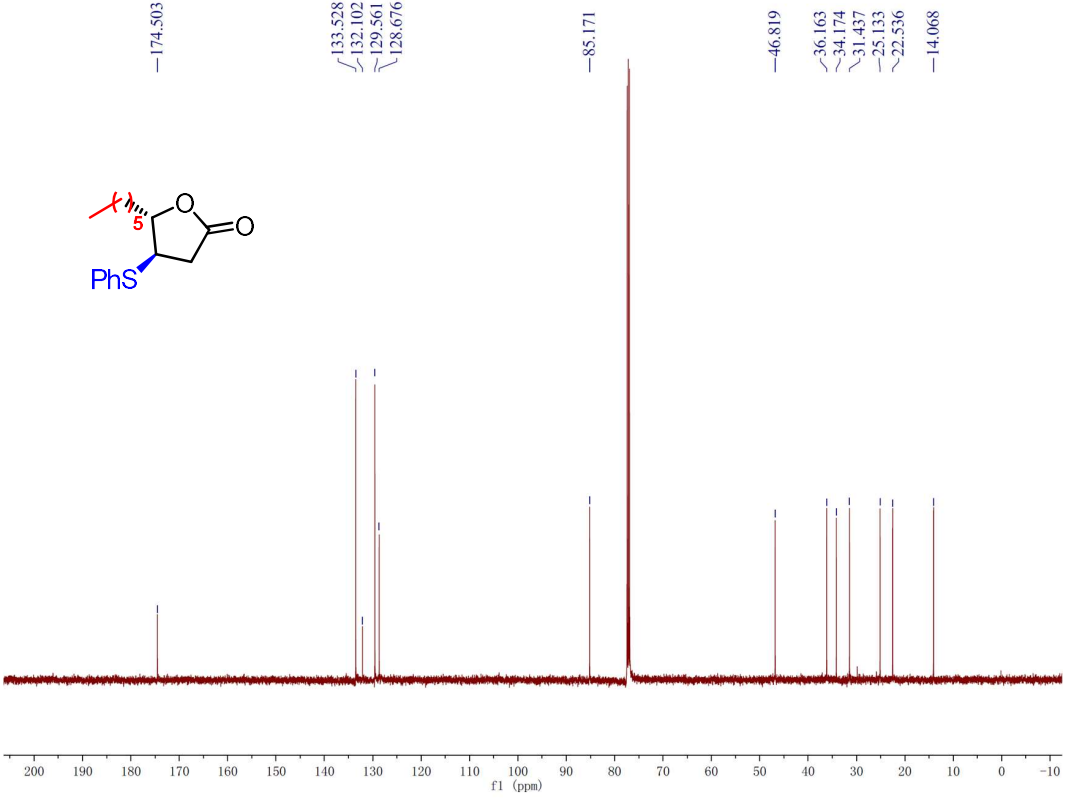

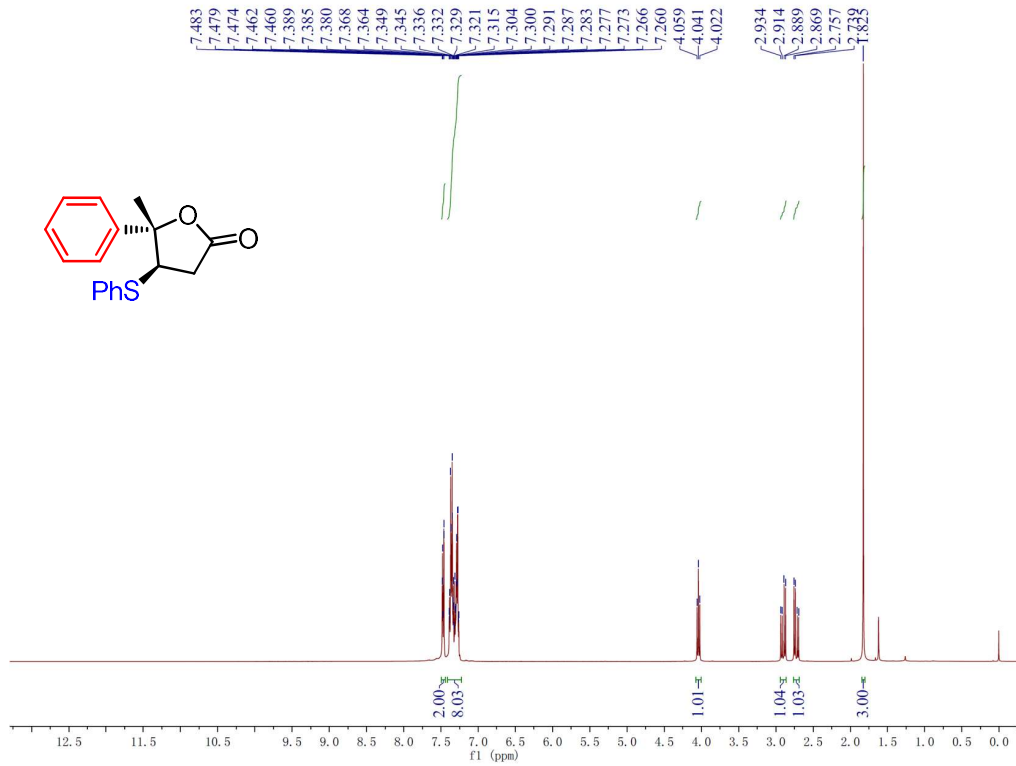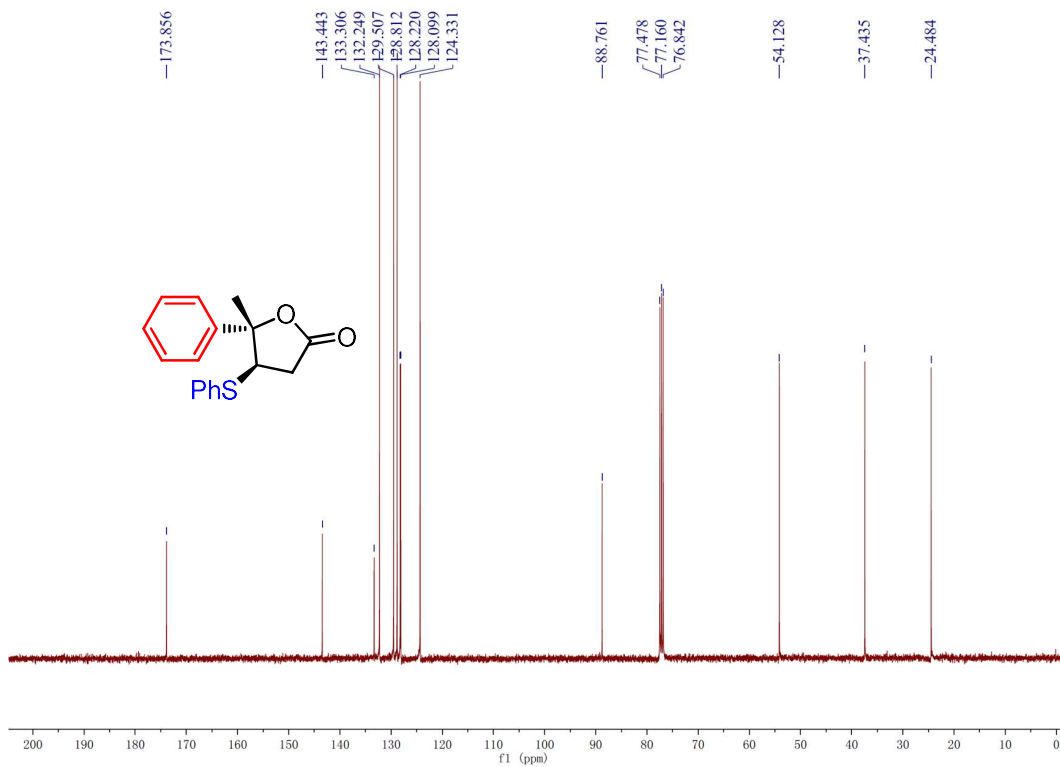

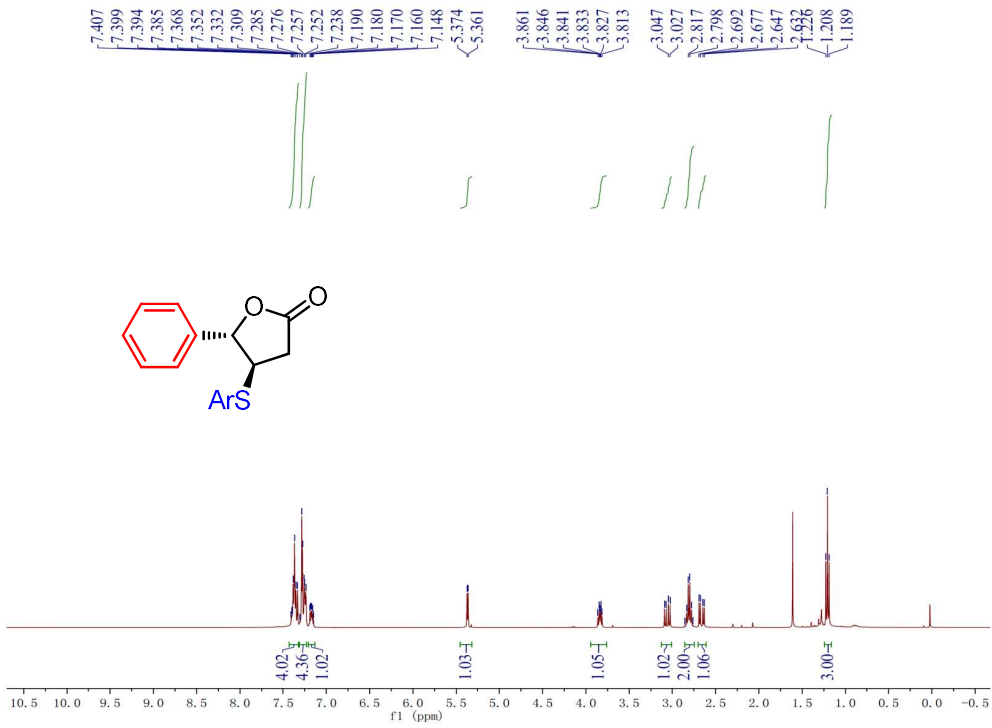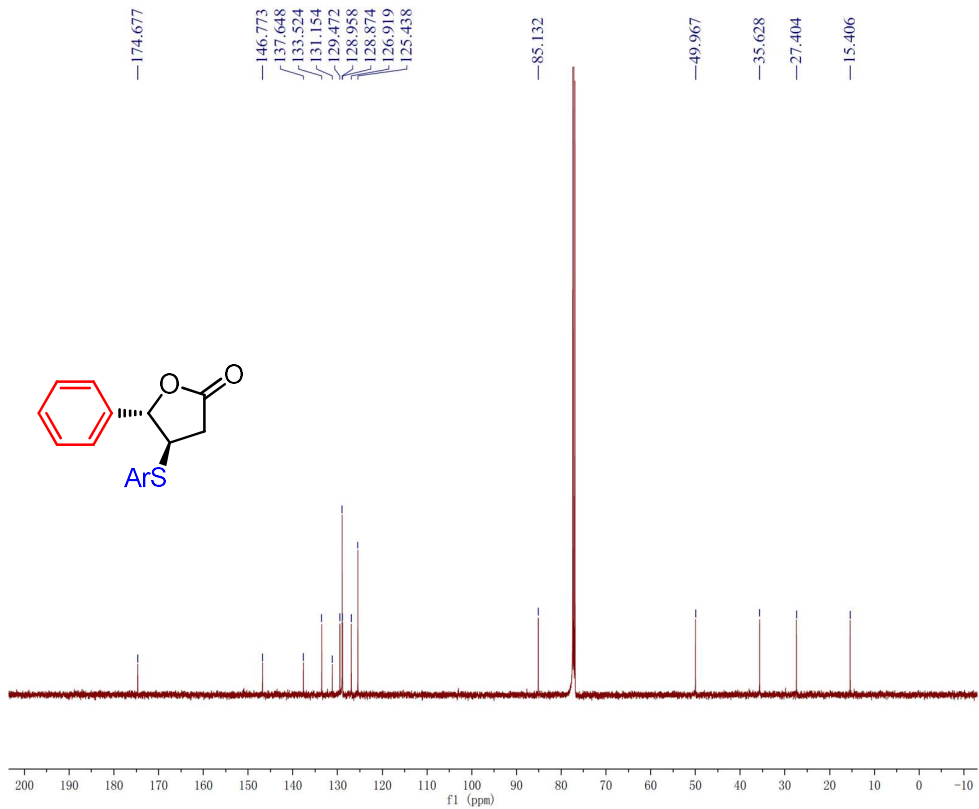

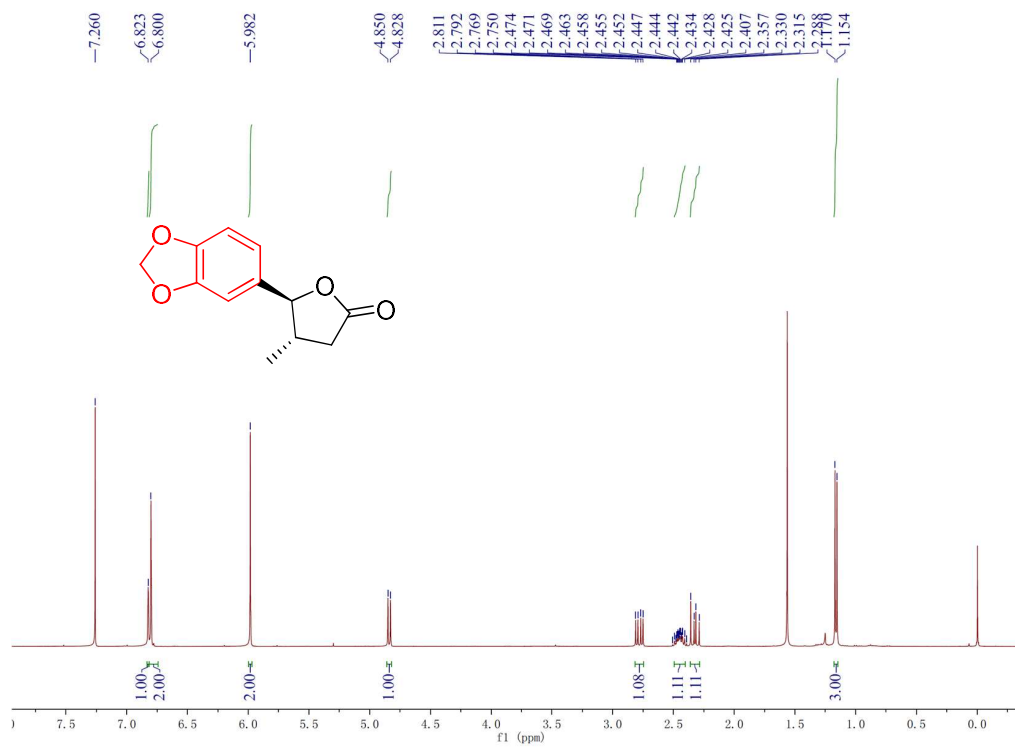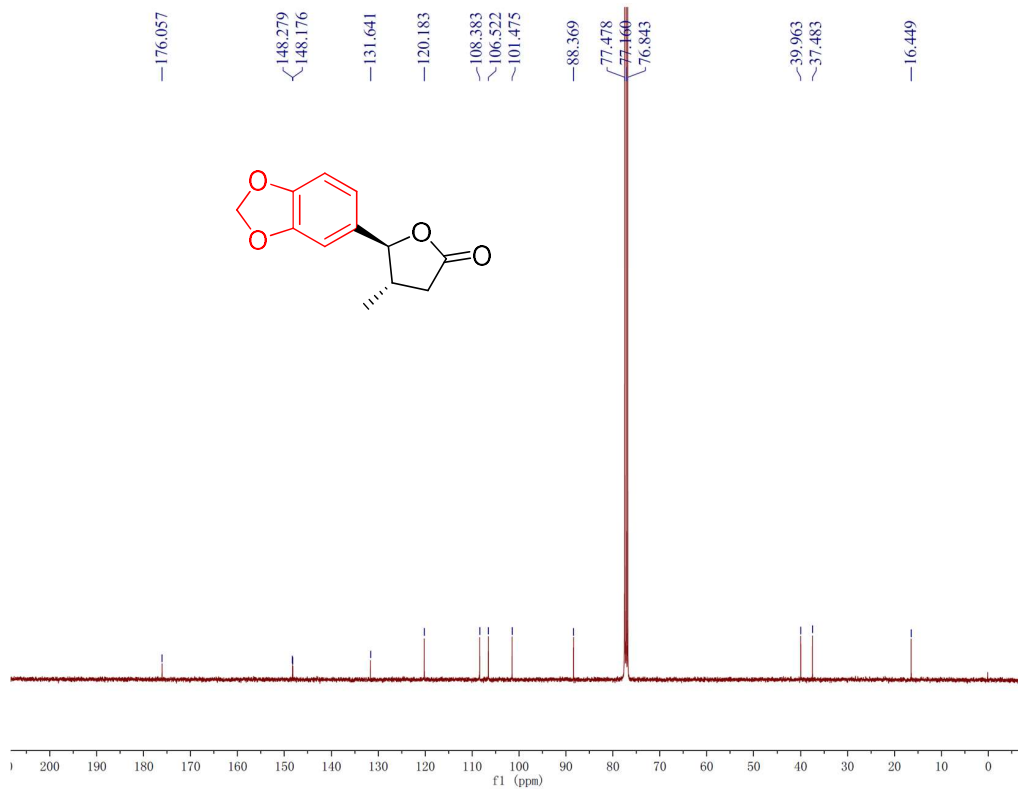

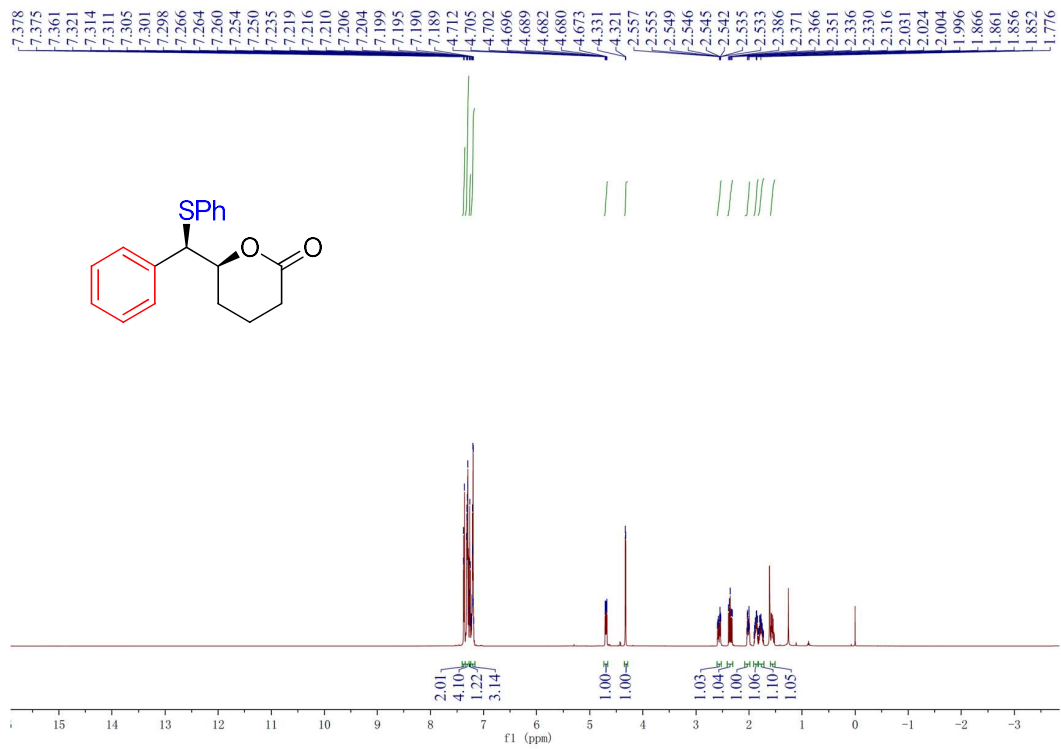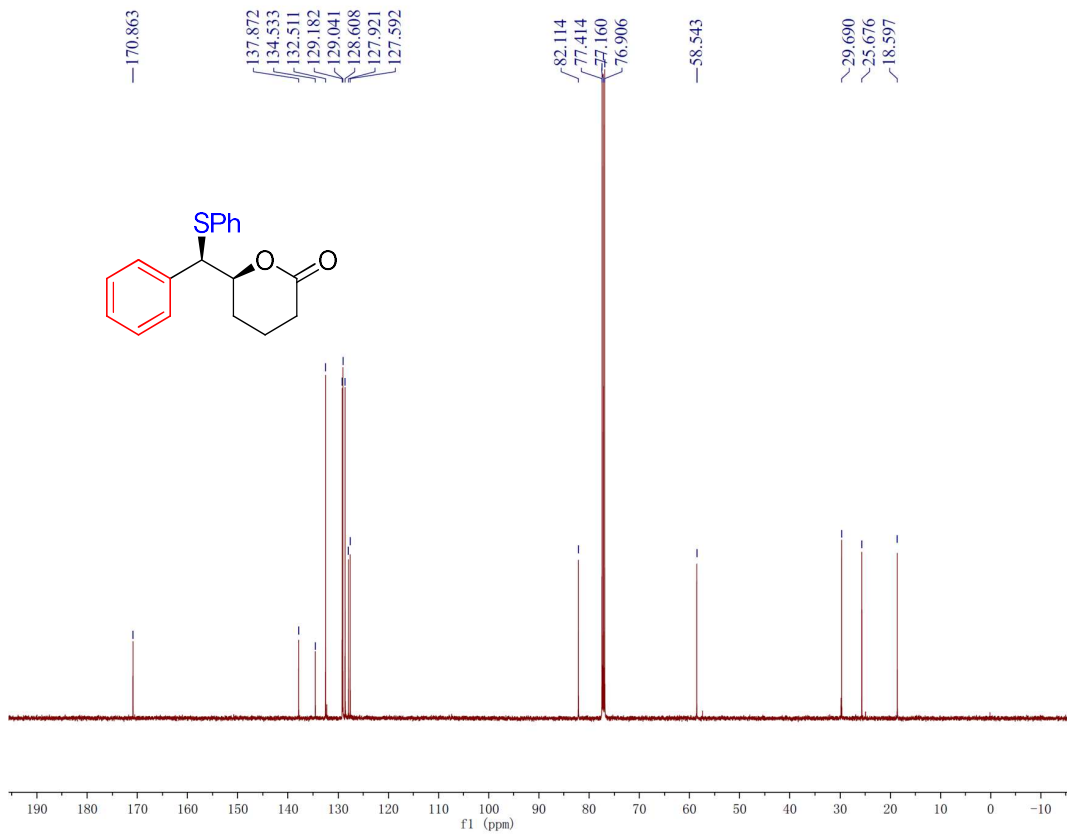

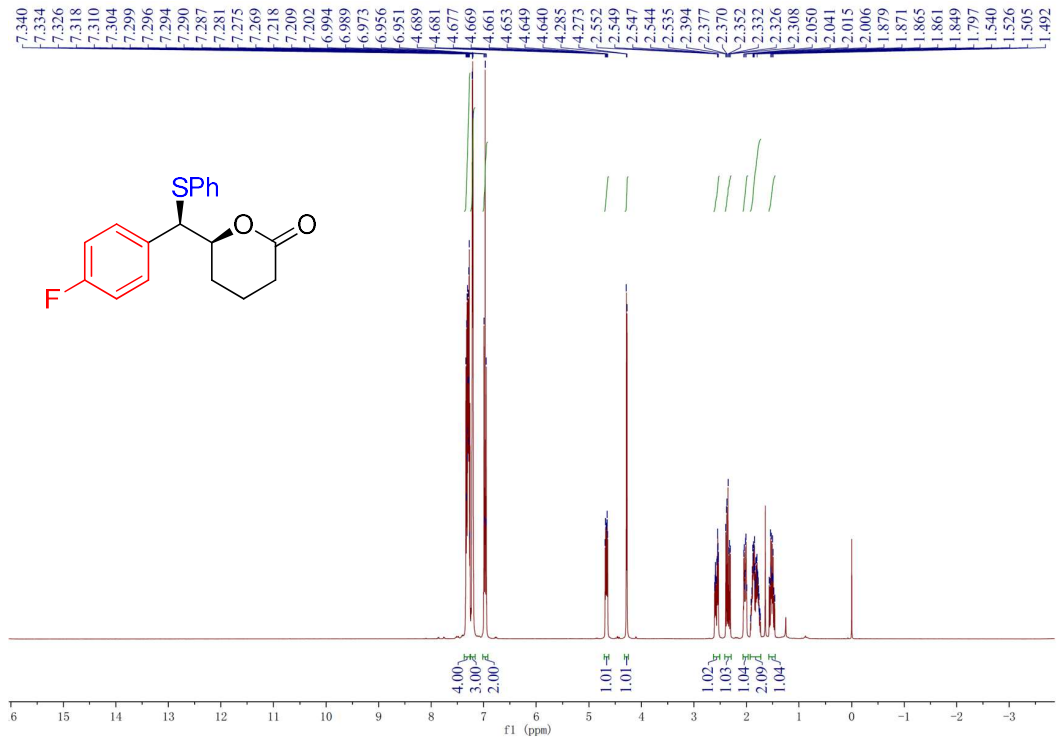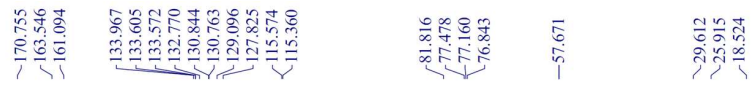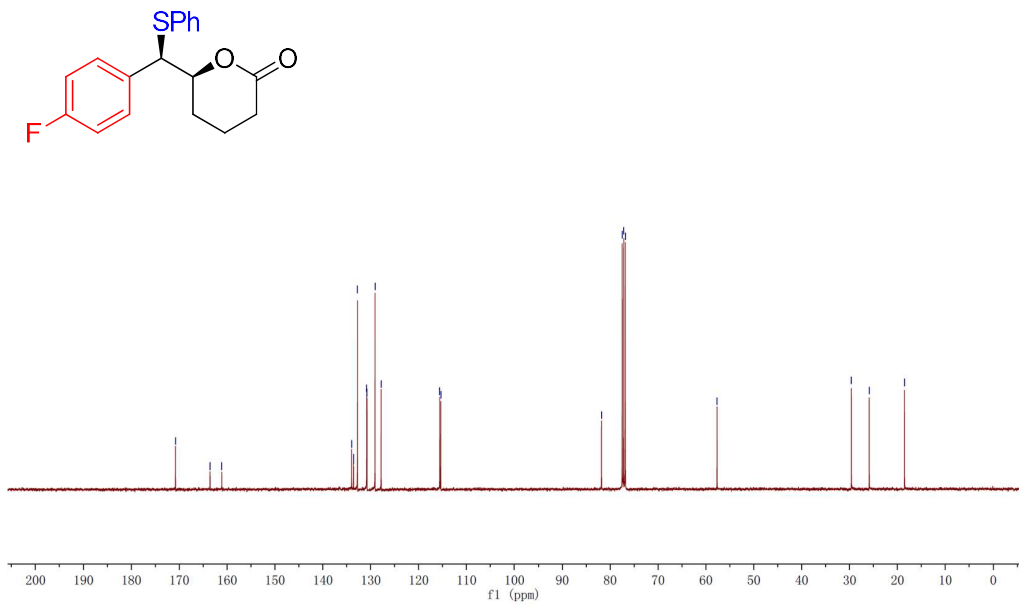



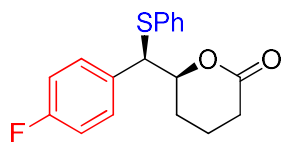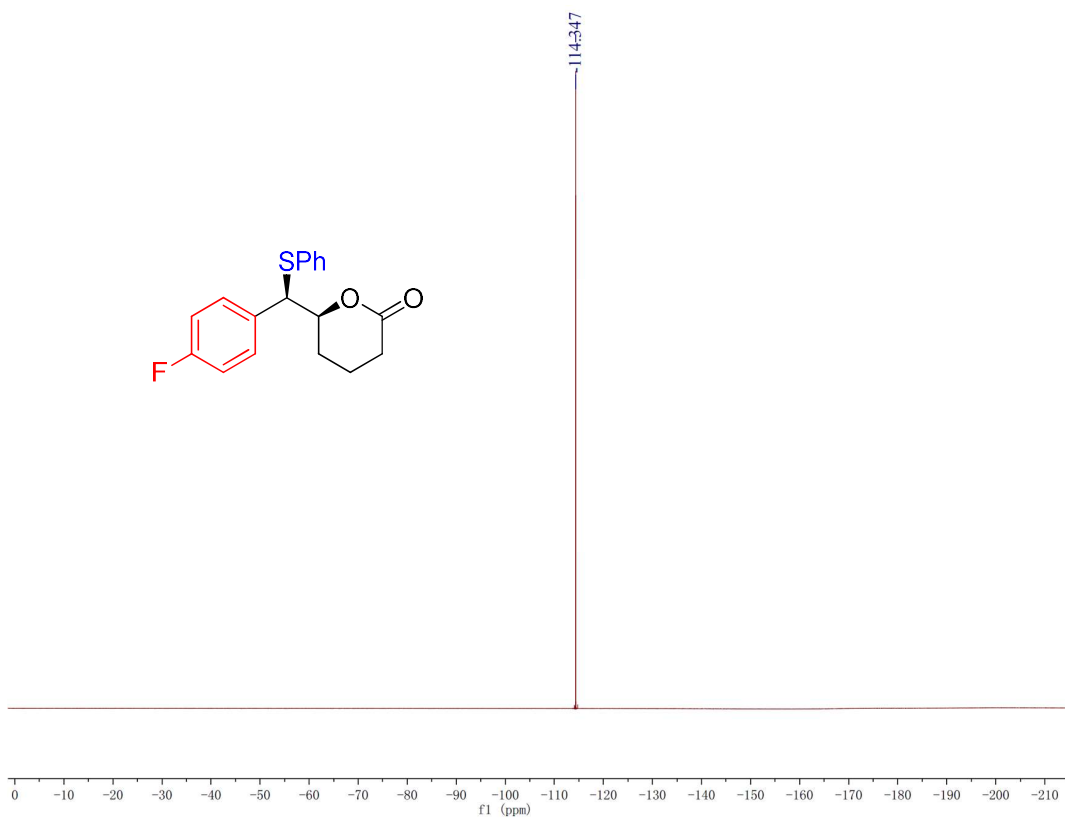

Supplement: c9cc04758a1.pdf [file c9cc04758a1.pdf]
